# Supplementary material
Source: PubMed Central journal article supplement (PMC7112697)
Supplement: mmc2.pdf [file mmc2.pdf]

**TABLE 4. Log<sub>2</sub> fold changes of 1752 significantly expressed genes.** Di, i-day after the primary immunization. Note that, D22 and D24 mean at 1 and 3 days after the secondary immunization.

| Gene ID                          | Gene Name                                                       | D1    | D3    | D5    | D8    | D12   | D21   | D22   | D24   |
|----------------------------------|-----------------------------------------------------------------|-------|-------|-------|-------|-------|-------|-------|-------|
| <b>Metabolism</b>                |                                                                 |       |       |       |       |       |       |       |       |
| <b>Carbohydrate Metabolism</b>   |                                                                 |       |       |       |       |       |       |       |       |
| BU202272                         | F-box protein Fbl7                                              | -0.92 | -1.38 | -1.47 | -1.52 | -0.57 | -0.79 | -0.53 | -0.75 |
| AI981161                         | CBPch04                                                         | 0.07  | -0.96 | -4.21 | -1.32 | -2.80 | -0.62 | -0.72 | -1.35 |
| AJ456897                         | transaldolase                                                   | 1.47  | 1.25  | 2.18  | 1.29  | 1.88  | 0.42  | 0.34  | 0.93  |
| BE140038                         | L-lactate dehydrogenase                                         | 2.12  | 1.14  | 1.01  | -0.12 | -0.77 | 0.01  | 0.32  | 0.11  |
| BU119965                         | F-box only protein 7                                            | -1.29 | -1.75 | -2.88 | -0.99 | 0.07  | 0.62  | 0.06  | 0.33  |
| AJ397515                         | F-box DNA helicase 1                                            | 1.69  | -0.12 | 0.49  | 0.27  | -0.84 | 1.09  | 0.61  | 0.41  |
| BE139913                         | aldehyde reductase                                              | -0.80 | -1.41 | -2.05 | -0.81 | -0.08 | 0.26  | 0.33  | -0.02 |
| BF723987                         | L-lactate dehydrogenase                                         | 2.05  | 1.15  | 1.06  | -0.21 | -0.53 | -0.17 | 0.09  | -0.10 |
| BU445302                         | sugar transport protein                                         | -1.64 | -2.52 | -4.35 | -1.17 | 0.22  | 0.15  | 0.34  | -0.11 |
| BU223624                         | Pyruvate dehydrogenase                                          | 0.33  | -0.14 | 0.84  | -0.15 | -1.05 | 1.04  | 0.04  | 0.20  |
| BU450297                         | N-chimerin                                                      | -1.17 | -0.86 | -2.17 | -0.76 | 0.99  | -0.27 | 0.03  | -0.07 |
| BU404766                         | integrin beta 1 binding protein 3 (ITGB1BP3)                    | 0.08  | 1.59  | 1.56  | 1.01  | -0.62 | 0.18  | 0.05  | 0.52  |
| AI979975                         | Glycine acetyltransferase                                       | 0.32  | -0.71 | -0.75 | -1.06 | -1.13 | -0.90 | -0.69 | -0.05 |
| BU215962                         | glucose transporter 10                                          | -1.09 | -0.37 | -1.59 | -0.51 | 0.19  | -0.77 | -0.36 | -0.45 |
| AW773175                         | glucose regulated protein GRP170                                | -0.17 | 0.07  | 1.45  | -0.12 | -1.03 | 1.29  | 0.10  | 0.33  |
| BE139958                         | glucose regulated protein GRP170                                | 0.44  | 0.70  | 1.38  | 0.41  | -0.05 | 1.05  | 0.35  | 0.64  |
| BU322649                         | aldo-keto reductase                                             | -0.51 | -1.02 | -1.35 | -0.54 | -3.69 | 0.48  | 0.55  | 0.63  |
| BU363653                         | UDP-glucuronate decarboxylase                                   | 0.85  | 0.77  | 0.95  | 0.14  | -1.03 | 1.47  | 0.98  | 0.95  |
| BU256837                         | starch phosphorylase                                            | -1.05 | -1.03 | -1.86 | -0.26 | -0.03 | 0.03  | 0.39  | 0.37  |
| BU363190                         | ribose-phosphate pyrophosphokinase                              | 0.27  | 1.16  | 1.51  | 0.19  | -1.08 | 1.06  | 0.14  | 0.56  |
| BU252846                         | pyruvate kinase                                                 | 0.51  | 1.29  | 1.34  | 0.80  | -1.82 | 0.97  | -0.63 | 1.37  |
| BU380541                         | phosphoacetylglucosamine mutase                                 | 0.22  | 0.05  | 1.80  | 0.70  | -0.54 | 2.09  | 0.17  | 0.63  |
| BU387900                         | malate dehydrogenase (oxaloacetate-decarboxylating)             | -0.81 | -0.20 | -1.04 | -0.38 | -1.00 | -0.44 | -0.40 | -0.17 |
| BM293892                         | glyceraldehyde 3-phosphate dehydrogenase                        | 0.22  | 0.67  | 1.14  | 0.84  | -0.78 | 1.92  | 0.21  | 0.99  |
| BU142331                         | enolase                                                         | -2.05 | -1.91 | -3.56 | -2.58 | -1.74 | -1.70 | -1.33 | -1.87 |
| BU255542                         | alpha-amylase inhibitor-1                                       | -1.20 | -0.60 | -1.02 | -0.63 | -0.05 | -1.02 | -0.50 | -0.63 |
| BU305103                         | alpha-amylase                                                   | -1.04 | -0.78 | -1.73 | -0.38 | 0.43  | -0.87 | -0.24 | -0.53 |
| BU284654                         | aconitate hydratase                                             | 0.87  | 1.59  | 2.18  | 1.44  | -1.59 | 2.00  | -0.04 | 1.98  |
| BU120048                         | 6-phosphofructokinase                                           | -0.13 | -0.71 | -1.28 | -1.39 | -1.29 | -0.59 | -0.61 | -0.86 |
| BU354429                         | 3-hydroxybutyrate dehydrogenase                                 | 0.06  | 0.72  | 1.29  | 0.47  | -0.52 | 1.38  | 0.18  | 0.96  |
| BU476499                         | carbonate dehydrataseII                                         | 0.52  | -0.50 | -0.48 | -1.31 | 0.04  | -1.09 | -0.95 | -0.29 |
| BU321708                         | butyrylcholinesterase                                           | -0.85 | -2.05 | -0.82 | -0.50 | -1.06 | 1.84  | 0.54  | 0.84  |
| BU205131                         | butyrate-induced transcript 1                                   | 1.30  | 0.78  | 1.38  | 0.18  | -1.95 | 1.48  | 0.41  | 0.66  |
| BU237661                         | branched-chain amino acid aminotransferase                      | 0.84  | 1.20  | 1.20  | 0.20  | 0.61  | -0.26 | -0.37 | -0.24 |
| BU291458                         | beta-hydroxysteroid dehydrogenase                               | -1.15 | -1.90 | -1.76 | -0.99 | -0.63 | 0.11  | -0.33 | -1.10 |
| BF723708                         | aldose reductase                                                | -0.92 | -1.54 | -2.32 | -0.95 | 0.23  | 0.27  | 0.31  | 0.05  |
| BU129617                         | N-chimaerin (N-chimerin)                                        | -1.18 | -1.27 | -1.76 | -0.68 | 0.54  | -0.17 | 0.09  | 0.03  |
| <b>Energy Metabolism</b>         |                                                                 |       |       |       |       |       |       |       |       |
| <i>Oxidative phosphorylation</i> |                                                                 |       |       |       |       |       |       |       |       |
| BU298803                         | succinate dehydrogenase (ubiquinone) flavoprotein subunit       | 0.71  | 1.60  | 1.40  | 0.42  | -2.24 | 1.29  | 0.89  | 1.07  |
| BU237840                         | cytochrome c oxidase subunit III                                | -0.61 | -1.00 | -1.12 | -0.32 | 0.04  | -0.74 | -0.17 | -0.12 |
| BF845754                         | cytochrome c                                                    | 0.53  | -4.85 | -2.89 | -6.15 | -0.50 | -0.96 | -1.01 | -0.07 |
| AW773165                         | NADH dehydrogenase (ubiquinone) 1 alpha subcomplex 4            | -0.85 | -0.95 | -1.25 | -0.91 | -1.64 | -1.03 | -0.63 | -0.57 |
| BF723830                         | NADH dehydrogenase (ubiquinone) 1 alpha subcomplex 4            | -0.62 | -0.75 | -1.08 | -0.76 | -1.46 | -0.89 | -0.51 | -0.31 |
| BU481784                         | V-type H <sup>+</sup> -transporting ATPase subunit AC39         | -0.68 | -1.06 | -1.34 | -1.37 | 0.44  | -0.86 | -0.83 | -0.46 |
| BU434056                         | V-type H <sup>+</sup> -transporting ATPase subunit A            | 0.31  | 0.52  | 1.53  | 0.09  | -0.22 | 1.59  | -0.08 | 0.29  |
| AJ446979                         | NADH dehydrogenase (ubiquinone) 1 beta subcomplex 8             | 1.18  | 1.45  | 1.58  | 1.05  | -0.40 | -0.06 | -0.14 | 0.23  |
| BU441306                         | NADH dehydrogenase (ubiquinone) 1 beta subcomplex 2             | -0.30 | -1.05 | -1.92 | -1.90 | -1.51 | -1.06 | -1.03 | -1.13 |
| <i>ATPases</i>                   |                                                                 |       |       |       |       |       |       |       |       |
| BU287703                         | Ca <sup>2+</sup> -transporting ATPase                           | 0.10  | 0.14  | 0.86  | -0.39 | -1.24 | 2.01  | 0.07  | 0.27  |
| BU232876                         | Ca <sup>2+</sup> -dependent activator for secretion protein 2   | -1.56 | -1.53 | -2.32 | -1.12 | 0.97  | -0.62 | -0.44 | -0.55 |
| BU205364                         | Ca <sup>2+</sup> -transporting ATPase                           | -1.38 | -1.24 | -1.53 | -1.11 | 0.37  | -0.14 | -0.29 | -0.54 |
| BU369370                         | Na <sup>+</sup> /K <sup>+</sup> -exchanging ATPase beta subunit | -0.41 | -0.62 | -0.64 | -1.72 | -1.15 | -0.24 | -0.34 | -0.15 |

## Lipid Metabolism

|          |                                                          |       |       |       |       |       |       |       |       |
|----------|----------------------------------------------------------|-------|-------|-------|-------|-------|-------|-------|-------|
| BU132245 | gonadotropin-regulated long chain acyl-CoA synthetase    | 0.76  | 0.47  | 1.13  | 0.08  | -1.37 | 1.93  | 0.38  | 1.14  |
| BU412866 | short/branched chain acyl-CoA dehydrogenase              | 0.23  | 0.04  | 1.14  | 0.50  | 1.34  | 0.51  | 0.28  | 0.00  |
| BU220450 | long-chain fatty-acid-CoA ligase                         | 1.08  | 0.18  | 1.45  | -0.17 | -0.87 | 1.44  | 0.33  | 0.12  |
| BU125255 | Fatty acyl-CoA hydrolase, medium chain(Thioesterase B)   | -0.95 | -1.12 | -2.37 | -0.23 | 1.10  | -0.29 | 0.01  | 0.10  |
| BU466150 | carnitine O-palmitoyltransferase 1                       | 0.10  | -0.55 | 1.04  | -0.61 | -0.89 | 1.11  | -0.60 | -0.34 |
| BU456908 | aldehyde dehydrogenase (NAD+)                            | -0.10 | 0.09  | 0.79  | 0.05  | -0.78 | 1.92  | 0.74  | 1.05  |
| BU447743 | acyl-CoA thioester hydrolase(p48)                        | 1.00  | 1.11  | 0.86  | -0.13 | -0.21 | 0.01  | -0.82 | -0.72 |
| BU447516 | acyl-CoA thioester hydrolase(p48)                        | 1.13  | 1.53  | 0.62  | 0.08  | -0.53 | -0.04 | -0.05 | -0.15 |
| BU290263 | acyl-CoA oxidase                                         | -1.53 | -3.21 | -2.39 | -3.17 | -2.96 | -1.85 | -2.07 | -1.10 |
| BU242367 | Sterol regulatory element binding protein-2 (SREBP-2)    | 0.00  | 1.07  | 1.03  | 0.52  | -1.36 | 1.72  | -0.24 | 1.58  |
| BU119527 | steroid receptor coactivator-1                           | -0.45 | -1.00 | -2.20 | -0.88 | 0.67  | -0.56 | -0.21 | 0.19  |
| BU410005 | Oxysterol binding protein-related protein 6              | 0.09  | -1.21 | -1.72 | -1.24 | -0.59 | -0.32 | 0.19  | 0.51  |
| BU372950 | Cotl1 protein                                            | 1.35  | 1.53  | 1.73  | 0.64  | -0.87 | 0.02  | -0.08 | 0.70  |
| BU215252 | trans-2-enoyl-CoA reductase                              | 1.42  | 1.02  | 0.19  | -0.08 | -0.97 | -0.75 | -0.63 | -0.48 |
| BM293876 | squalene monooxygenase                                   | -0.44 | -0.38 | -1.37 | -1.04 | -0.20 | -0.28 | -0.03 | -0.28 |
| BG624994 | serine palmitoyltransferase                              | 1.96  | 1.23  | 1.33  | 0.26  | -0.26 | 0.06  | 0.09  | -0.24 |
| AA495705 | prostaglandin-H2 D-isomerase                             | -0.77 | -1.81 | -2.42 | -1.71 | 0.38  | 0.18  | -0.25 | -0.34 |
| BU317918 | oleoyl-[acyl-carrier-protein] hydrolase                  | 0.89  | -0.18 | 0.55  | -0.28 | -0.44 | -1.09 | -1.26 | -0.37 |
| BU132151 | NAD(P)H dehydrogenase (quinone)                          | -1.16 | -0.97 | -2.42 | -0.39 | -1.69 | 0.34  | 0.58  | 0.59  |
| BU360542 | glyceronephosphate O-acyltransferase                     | -0.03 | -0.05 | 0.71  | -0.19 | -1.07 | 1.41  | 0.00  | -0.03 |
| BU438678 | glycerol-3-phosphate dehydrogenase (NAD+)                | -1.20 | -0.58 | -1.59 | -0.66 | 0.19  | -1.12 | -0.95 | -0.56 |
| BU388194 | flavin-containing monooxygenase 3                        | -1.03 | -0.65 | -1.00 | 0.67  | -0.03 | 0.08  | 0.29  | 0.36  |
| BU219738 | fatty acid desaturase                                    | 0.99  | 1.03  | 1.59  | 0.77  | -0.74 | 1.24  | 1.08  | 0.73  |
| BU243371 | farnesyl-diphosphate farnesyltransferase                 | 0.12  | 0.58  | 0.56  | 0.25  | -1.06 | 0.88  | -0.49 | 1.20  |
| BU246297 | cytochrome P450, family 2, subfamily C                   | -1.27 | -1.12 | -2.06 | -0.13 | -0.59 | -0.13 | 0.05  | 0.39  |
| BU125797 | cytochrome P450, family 2, subfamily C                   | -0.56 | -1.35 | -1.09 | -0.72 | -1.50 | -0.49 | -0.28 | -0.46 |
| BU321681 | Cytochrome P450 26(Retinoic acid degrading enzyme CYP26) | -1.31 | -1.70 | -0.98 | -0.62 | 0.59  | -0.53 | -0.32 | -0.80 |
| BU378286 | choline kinase                                           | -0.11 | -0.41 | 0.52  | 0.41  | 1.07  | 1.32  | -0.41 | -0.03 |
| BU222729 | choline kinase                                           | 1.12  | 0.52  | 0.28  | -0.76 | -1.33 | 1.56  | 0.03  | 0.13  |
| BU232535 | ceramide kinase                                          | 0.08  | -0.90 | 2.11  | -0.16 | -0.82 | 1.02  | -0.22 | -0.27 |
| BU316147 | acetyl-CoA acyltransferase                               | 0.29  | 0.96  | 0.26  | 0.16  | -1.07 | 0.45  | 0.14  | 1.05  |
| AI981579 | 3-oxoacyl-[acyl-carrier-protein] synthase                | 0.27  | 0.81  | 1.61  | 0.80  | 1.99  | 1.92  | 0.34  | 0.95  |
| BU467947 | 3-hydroxy-3-methylglutaryl-CoA reductase                 | 0.58  | -0.33 | 1.11  | 0.00  | -1.40 | 1.69  | 0.15  | 0.38  |

## Nucleotide Metabolism

|          |                                                                |       |       |       |       |       |       |       |       |
|----------|----------------------------------------------------------------|-------|-------|-------|-------|-------|-------|-------|-------|
| BU382581 | Cytosolic purine 5'-nucleotidase(5'-nucleotidase cytosolic II) | 0.65  | 1.00  | 1.88  | 0.61  | -1.20 | 2.03  | 0.67  | 0.62  |
| BU470575 | thioredoxin reductase (NADPH)                                  | 3.12  | 1.55  | 2.31  | 0.61  | -1.63 | 2.26  | 0.48  | 1.29  |
| BF724026 | ribonucleoside-diphosphate reductase M2 chain                  | -0.10 | 1.75  | 1.90  | 0.56  | 0.53  | 0.10  | -0.16 | -0.04 |
| BE139888 | ribonucleoside-diphosphate reductase beta chain                | 0.51  | 2.03  | 1.99  | 0.67  | 0.50  | 0.31  | -0.04 | 0.06  |
| AW773120 | ribonucleoside-diphosphate reductase beta chain                | 0.14  | 1.91  | 1.90  | 0.54  | 0.56  | 0.26  | 0.06  | -0.07 |
| BF723689 | phosphoribosylaminoimidazole carboxylase                       | 0.55  | 1.18  | 1.47  | 0.57  | -0.63 | 0.81  | 0.75  | 0.66  |
| BU450858 | nucleotide pyrophosphatase                                     | -0.03 | 1.21  | 1.13  | -0.15 | -0.25 | -0.04 | -0.19 | -0.23 |
| BU491491 | beta-N-acetylhexosaminidase                                    | -0.26 | -0.21 | -1.01 | 0.21  | -1.14 | 0.10  | 0.29  | 0.56  |
| AJ447954 | apyrase                                                        | 1.33  | 0.94  | 1.39  | 0.34  | 0.39  | 1.32  | 0.60  | 0.83  |
| BU221375 | thioredoxin reductase (NADPH)                                  | 2.65  | 1.14  | 0.81  | 0.62  | -1.02 | 0.81  | 0.45  | 0.87  |
| BU412152 | thioredoxin                                                    | -1.96 | -2.07 | -2.73 | -1.70 | 0.69  | -0.94 | -0.31 | -0.38 |
| BU112992 | sulfate adenylyltransferase                                    | -0.16 | 0.39  | -1.11 | -1.11 | 0.03  | -0.76 | -0.51 | -0.46 |
| BU113015 | phosphoribosylaminoimidazolecarboxamide formyltransferase      | -1.64 | -0.81 | -1.31 | -0.42 | -1.37 | -0.53 | -0.53 | -0.53 |
| BU241219 | nucleotide pyrophosphatase                                     | 0.77  | 1.01  | 0.92  | 0.93  | 1.75  | 2.28  | 0.92  | 0.17  |
| BU298085 | IMP dehydrogenase                                              | -0.03 | 1.33  | 0.48  | 0.32  | -1.85 | 0.28  | 0.41  | 0.84  |
| BU132572 | guanylate cyclase                                              | -1.12 | -1.12 | -0.34 | -0.45 | 1.09  | -0.21 | 0.09  | -0.31 |
| BU251576 | apyrase                                                        | 0.23  | 1.20  | -0.33 | -0.22 | -1.56 | 0.36  | 0.03  | 0.35  |
| BU248207 | adenosine deaminase                                            | -1.77 | -1.70 | -2.30 | -1.25 | -0.19 | -0.74 | -0.56 | -0.48 |
| BU273487 | 5'-nucleotidase                                                | 1.99  | 1.21  | 0.29  | -0.03 | -1.14 | -0.62 | -0.17 | -0.18 |

## Amino Acid Metabolism

|          |                                                            |       |       |       |       |       |       |       |       |
|----------|------------------------------------------------------------|-------|-------|-------|-------|-------|-------|-------|-------|
| BU213406 | protein arginine methyltransferase 7 (PRMT7)               | 0.16  | -0.20 | 1.17  | 0.11  | -1.23 | 0.76  | 0.21  | -0.06 |
| BG625497 | nuclear zinc finger protein Np95                           | 1.01  | 1.96  | 2.51  | 1.31  | 0.71  | 0.01  | 0.07  | 0.07  |
| BU352910 | myosin regulatory light chain interacting protein (MyIip), | -0.33 | 0.08  | 1.04  | -0.33 | -2.83 | 1.52  | -0.11 | 0.01  |
| BU368938 | tyrosyl-tRNA synthetase                                    | 0.79  | 1.36  | 0.80  | 0.28  | -1.97 | 0.46  | -0.27 | 1.08  |
| BU314133 | saccharopine dehydrogenase (NADP+, L-lysine forming)       | 0.01  | -0.55 | 1.52  | -0.17 | -0.25 | 1.97  | 0.22  | 0.04  |
| BU108511 | phenylalanyl-tRNA synthetase alpha chain                   | -1.20 | -0.81 | -1.12 | -0.33 | -0.90 | -0.41 | -0.12 | -0.37 |
| AJ447359 | phenylalanyl-tRNA synthetase alpha chain                   | -1.26 | -1.70 | -1.37 | -0.89 | 0.01  | -0.63 | -0.62 | -0.08 |

|                                             |                                                           |       |       |       |       |       |       |       |       |
|---------------------------------------------|-----------------------------------------------------------|-------|-------|-------|-------|-------|-------|-------|-------|
| BU125423                                    | nitric-oxide synthase                                     | 1.64  | 0.02  | 0.28  | -1.44 | -1.62 | 1.36  | 0.34  | 0.97  |
| BU395494                                    | lysyl-tRNA synthetase, class II                           | 1.04  | 0.40  | 1.78  | 0.04  | -1.73 | 1.39  | 0.45  | 0.94  |
| BE140055                                    | lysyl-tRNA synthetase, class II                           | 0.31  | 0.86  | 1.08  | 0.26  | -1.60 | 0.77  | 0.44  | 0.59  |
| BU405554                                    | leucyl-tRNA synthetase                                    | 0.16  | 1.08  | 0.91  | 0.36  | -1.00 | 0.95  | 0.08  | 0.21  |
| BU376038                                    | Histamine N-methyltransferase(HMT)                        | -0.33 | -1.03 | -2.39 | -2.37 | -0.76 | -1.12 | -0.41 | -1.17 |
| BU258538                                    | glycyl-tRNA synthetase, class II                          | 1.01  | 0.37  | 1.14  | 1.13  | 0.72  | 0.68  | 0.70  | 0.25  |
| BU420746                                    | glutathione S-transferase                                 | -1.08 | -1.20 | -2.50 | -0.36 | -0.05 | 0.51  | 0.43  | 0.62  |
| BU308626                                    | glutathione S-transferase                                 | -1.00 | -1.28 | -1.38 | -0.17 | -0.22 | -0.08 | 0.28  | -0.01 |
| BG625608                                    | glutathione S-transferase                                 | -1.23 | -1.43 | -2.40 | -0.40 | 0.46  | 0.53  | 0.59  | 0.59  |
| BU271909                                    | glutamyl-tRNA synthetase                                  | 0.14  | 0.71  | 1.34  | -0.14 | -1.24 | 1.63  | -0.11 | -0.13 |
| BE139753                                    | glutamate--cysteine ligase                                | 1.04  | 1.22  | 1.25  | 0.29  | -2.82 | 0.67  | 0.76  | 1.08  |
| BU326413                                    | enoyl-CoA hydratase                                       | -1.10 | -0.78 | -1.24 | 0.32  | -0.48 | -0.39 | 0.17  | 0.51  |
| BU104218                                    | cystathionine gamma-lyase                                 | -1.50 | -1.11 | -2.07 | -0.61 | 1.07  | -0.22 | -0.21 | -0.29 |
| BU130682                                    | creatine kinase                                           | -0.69 | -1.08 | -1.70 | -0.08 | -1.12 | 0.05  | 0.23  | -0.21 |
| BU386525                                    | catalase                                                  | -1.01 | -1.62 | -0.52 | -1.25 | -2.16 | 0.91  | 0.08  | 0.25  |
| AJ449055                                    | catalase                                                  | -0.79 | 0.52  | -0.50 | 1.18  | -1.06 | 0.04  | 0.06  | 0.85  |
| BU366487                                    | asparagine synthase (glutamine-hydrolysing)               | 1.35  | 1.58  | 1.97  | 1.16  | -1.19 | 1.28  | 0.46  | 0.83  |
| AI981789                                    | arginine kinase                                           | -0.66 | -1.12 | -1.85 | -0.26 | -0.01 | -0.16 | 0.11  | -0.44 |
| BU421866                                    | alanyl-tRNA synthetase                                    | 0.29  | 0.47  | 1.14  | -0.15 | -0.24 | 1.14  | 0.03  | 0.73  |
| <b>Glycan Biosynthesis and Metabolism</b>   |                                                           |       |       |       |       |       |       |       |       |
| AI979983                                    | Platelet proteoglycan core protein                        | 1.63  | 1.14  | 1.51  | 1.51  | 0.71  | 0.28  | 0.43  | 0.69  |
| BU270022                                    | Polypeptide N-acetylgalactosaminyltransferase(UDP-GalNAc) | 0.14  | 0.17  | 0.04  | 0.32  | -2.02 | -0.90 | -1.27 | -0.51 |
| BU417913                                    | polypeptide N-acetylgalactosaminyltransferase             | 0.31  | 1.03  | 1.02  | 0.14  | -0.87 | 1.16  | -0.30 | -0.07 |
| BU387437                                    | phosphatidylinositol glycan, class Q                      | -1.39 | -0.67 | -1.12 | -0.34 | -0.40 | -0.16 | -0.35 | -0.06 |
| BU265765                                    | beta-mannosidase                                          | -0.25 | -0.11 | 0.35  | -0.44 | -1.55 | 1.16  | -0.34 | 0.16  |
| BF723774                                    | beta-galactosidase                                        | 0.13  | 0.87  | 1.27  | -0.11 | -0.47 | 1.55  | -0.23 | 0.19  |
| BU343129                                    | beta-1,4-N-acetylglucosaminyltransferase                  | -0.79 | 0.07  | -1.03 | -0.20 | 1.46  | -0.65 | -0.51 | -0.33 |
| BU451692                                    | beta-1,4-galactosyltransferase 4                          | 2.41  | 1.82  | 1.25  | 0.94  | 0.38  | 0.42  | 0.89  | 0.18  |
| BU296594                                    | beta-1,4-galactosyltransferase 1                          | 1.05  | 0.57  | 0.43  | -0.29 | -1.78 | 0.28  | -0.10 | 0.47  |
| BU427254                                    | beta-1,3-N-acetylglucosaminyltransferase 4                | 1.25  | 0.78  | -0.03 | 0.08  | -1.43 | -0.19 | 0.11  | 0.18  |
| BU213166                                    | alpha-mannosidase                                         | -0.24 | 0.68  | 1.16  | 0.33  | -0.99 | 2.17  | -0.45 | 0.54  |
| BU301370                                    | alpha-1,6-mannosyltransferase                             | 0.50  | 0.77  | 1.80  | 0.16  | -2.10 | 1.01  | 0.49  | 0.62  |
| BU450693                                    | alpha-1,3-mannosylglycoprotein                            | -2.12 | -0.85 | -2.11 | -0.83 | -0.48 | -1.01 | -0.46 | -0.74 |
|                                             | beta-1,4-N-acetylglucosaminyltransferase                  |       |       |       |       |       |       |       |       |
| BU386821                                    | alpha-1,3-glucosyltransferase                             | 0.45  | 0.43  | 1.52  | 0.37  | -1.60 | 0.98  | 0.79  | 0.79  |
| BU463252                                    | alpha-1,3(6)-mannosylglycoprotein                         | 0.26  | 1.74  | 0.92  | 1.07  | -0.08 | 0.51  | 0.52  | 0.62  |
|                                             | beta-1,6-N-acetyl-glucosaminyltransferase                 |       |       |       |       |       |       |       |       |
| BU246825                                    | 16 kDa beta-galactoside-binding lectin                    | -0.77 | -1.38 | -0.97 | -1.08 | -0.37 | -0.27 | -0.67 | -0.74 |
| <b>Metabolism of Cofactors and Vitamins</b> |                                                           |       |       |       |       |       |       |       |       |
| BU233601                                    | type II pantothenate kinase                               | -1.03 | -0.81 | -1.31 | 0.14  | -0.33 | 0.02  | 0.57  | 0.62  |
| BU133770                                    | methylenetetrahydrofolate reductase (NADPH)               | 0.24  | 1.23  | 1.67  | 1.04  | 0.74  | 0.97  | 0.68  | 0.82  |
| BU212995                                    | biliverdin reductase                                      | -0.28 | 0.13  | 1.64  | 1.21  | 1.62  | 0.62  | 0.11  | 0.08  |
| BU239943                                    | beta-carotene 15,15'-monooxygenase                        | 2.01  | 1.36  | 0.84  | -0.27 | 1.39  | 0.16  | -0.20 | 0.51  |
| BU467836                                    | heme oxygenase                                            | 0.75  | 1.27  | 0.93  | 0.61  | -1.68 | -0.30 | -0.27 | 0.18  |
| BU439953                                    | biliverdin reductase                                      | -0.34 | 0.13  | 1.34  | 1.03  | 1.76  | 0.30  | -0.04 | 0.25  |
| <b>Genetic Information Processing</b>       |                                                           |       |       |       |       |       |       |       |       |
| <b>Transcription</b>                        |                                                           |       |       |       |       |       |       |       |       |
| BU230546                                    | zinc finger protein KF-1                                  | 0.29  | -0.77 | -1.30 | -1.12 | -0.24 | -0.64 | -0.67 | -0.70 |
| BU404443                                    | Zinc finger protein 313                                   | 1.32  | 1.09  | 1.58  | 0.74  | -0.39 | 1.13  | 0.36  | 0.32  |
| BU329860                                    | Zinc finger protein 216                                   | 1.57  | 0.26  | 1.48  | -0.13 | -2.14 | 0.97  | 0.60  | 0.78  |
| BU459541                                    | Zinc finger DHHC domain containing protein 9              | -0.48 | -0.10 | -0.61 | 0.42  | -1.44 | 0.27  | 0.33  | 1.05  |
| BU217107                                    | U1 snRNP A protein                                        | -1.04 | -0.98 | -1.74 | -1.28 | -0.05 | -0.98 | -0.73 | -0.65 |
| BU293484                                    | Transcriptional regulator ATRX (X-linked helicase II)     | 0.54  | 1.21  | 1.76  | 0.85  | -0.74 | 1.14  | 0.75  | 0.95  |
| AJ456664                                    | Transcription factor SOX-4                                | 0.94  | 1.15  | 1.64  | 0.87  | -0.74 | -0.31 | -0.42 | 0.24  |
| BU227789                                    | Transcription factor EB                                   | -0.51 | 0.16  | -1.29 | -0.52 | 0.00  | -1.19 | -0.48 | -0.26 |
| BU463936                                    | Transcription factor alphaA-CRYBP1                        | 0.22  | 0.07  | 1.24  | -0.26 | 0.07  | 1.62  | 0.10  | 0.49  |
| BU290490                                    | TATA element modulatory factor (TMF)                      | 0.48  | 1.18  | 1.70  | 1.02  | -0.83 | 1.45  | 1.00  | 0.95  |
| AI981644                                    | Spi-1/PU.1 transcription factor                           | 1.41  | 1.08  | 1.09  | 0.59  | 1.20  | 0.25  | 0.12  | 0.32  |
| BU372216                                    | simMyc-associated zinc finger protein                     | -1.38 | -1.11 | -1.59 | 0.01  | 0.30  | -0.80 | -0.20 | -0.65 |
| BU327545                                    | orf405                                                    | 0.79  | 0.57  | 1.03  | 0.45  | -1.04 | 1.19  | 0.87  | 1.06  |
| BU135152                                    | transcription factor BIGMAX beta                          | -0.06 | 0.56  | -1.29 | -1.11 | -1.20 | -0.51 | -0.22 | -0.47 |
| BU439416                                    | Protein C20orf11                                          | 0.26  | 0.62  | 1.62  | -0.21 | -0.63 | 2.01  | -0.20 | 0.05  |

|                                         |                                                                         |       |       |       |       |       |       |       |       |
|-----------------------------------------|-------------------------------------------------------------------------|-------|-------|-------|-------|-------|-------|-------|-------|
| BU370299                                | orf14 protein                                                           | -0.88 | -1.17 | -2.51 | -0.90 | -0.43 | 1.02  | 0.58  | 1.06  |
| BU470613                                | Kruppel-like zinc finger protein HKR-T1                                 | 1.00  | -0.14 | 1.25  | 0.07  | -0.51 | 0.84  | 0.01  | 0.16  |
| BG625456                                | helicase like protein 2                                                 | 1.19  | 0.44  | 1.21  | -0.23 | -2.40 | 1.38  | -0.37 | -0.64 |
| BU215406                                | helicase                                                                | 0.04  | 1.54  | 1.35  | 0.64  | 0.84  | 0.01  | 0.09  | 0.24  |
| BU137926                                | early hematopoietic zinc finger                                         | 0.94  | 0.33  | 0.41  | -1.05 | -2.32 | 0.77  | 0.06  | -0.24 |
| BU137569                                | EAF1                                                                    | 0.06  | -0.45 | -1.22 | -1.09 | -1.00 | -0.50 | -0.27 | -0.51 |
| BE140048                                | CRM1                                                                    | 0.96  | 0.95  | 2.10  | 0.44  | 0.12  | 1.65  | 0.33  | 0.24  |
| BU339707                                | Cre binding protein-like 2                                              | -0.47 | -1.10 | -2.04 | -1.09 | 0.42  | 0.00  | 0.21  | 0.05  |
| BU360032                                | CPEB-associated factor Maskin                                           | 0.77  | 1.16  | 3.22  | 0.87  | -0.98 | 2.31  | -0.02 | 0.45  |
| AJ456739                                | C3HC4-like zinc finger protein                                          | 1.94  | 1.09  | 0.82  | 0.23  | 0.06  | 0.05  | 0.13  | -0.02 |
| AJ455582                                | C3HC4-like zinc finger protein                                          | -0.40 | 0.50  | 1.14  | 1.36  | 1.40  | 0.45  | 0.37  | 1.61  |
| AJ447593                                | C20orf45 homolog                                                        | 0.36  | 0.88  | 1.07  | 1.03  | -0.43 | -0.20 | -0.17 | 0.46  |
| BU259047                                | BTB domain protein                                                      | -0.48 | -0.71 | -1.70 | -1.00 | -0.04 | -0.62 | -0.49 | -0.36 |
| BU382701                                | bromodomain adjacent to zinc finger domain 1A                           | 1.31  | 1.68  | 1.64  | 0.97  | 0.05  | 0.70  | 0.25  | 0.75  |
| BU318245                                | Zinc finger protein CKR1                                                | 1.83  | 1.06  | 0.72  | 1.04  | 0.82  | 0.34  | 0.85  | 0.44  |
| BU477529                                | zinc finger protein                                                     | 0.43  | 0.41  | 1.19  | 0.11  | -0.46 | 1.52  | 0.07  | 0.39  |
| BG624977                                | Zinc finger homeobox protein 1b (Smad interacting protein 1)            | 1.01  | 1.34  | 0.39  | -0.09 | 0.10  | -0.26 | -0.57 | -0.33 |
| BU320498                                | Zinc finger DHHC domain containing protein 3 (                          | 1.18  | 1.28  | 0.67  | 0.72  | 0.31  | -0.13 | 0.27  | 0.03  |
| AI980734                                | XNop56 protein                                                          | 0.49  | 1.36  | 0.95  | 0.69  | -1.40 | 0.30  | 0.16  | 1.03  |
| BU313550                                | transcription regulator protein                                         | 1.81  | 0.42  | 1.18  | -0.36 | 0.32  | 1.23  | -0.07 | -0.23 |
| BE139981                                | transcription factor RAM2                                               | 0.43  | 1.34  | 1.43  | 0.91  | -0.32 | 0.32  | 0.40  | 0.53  |
| AI981674                                | transcription factor IIB                                                | -1.19 | -1.17 | -1.16 | 0.08  | -0.21 | -0.34 | 0.10  | -0.12 |
| BU239570                                | Splicing factor 3B subunit 3                                            | 0.02  | 0.85  | 1.59  | 0.05  | -0.58 | 2.03  | 0.24  | 0.93  |
| BU226344                                | Nopp140                                                                 | 0.47  | 1.17  | 1.02  | 0.24  | 0.45  | 0.35  | -0.01 | 0.34  |
| BU478266                                | NOP58-like protein                                                      | 0.97  | 1.32  | 1.38  | 0.21  | -1.05 | 1.11  | -0.08 | 0.75  |
| BU445161                                | Histone RNA hairpin-binding protein (Histone stem-loop binding protein) | 1.28  | 1.15  | 2.50  | -0.06 | -0.08 | -0.41 | -0.83 | -0.76 |
| BU362066                                | histone H3 kinase homolog                                               | 0.33  | 0.37  | 1.82  | 0.02  | -1.34 | 1.48  | 0.03  | -0.03 |
| BU415330                                | histone H2A.F                                                           | 1.30  | 1.67  | 1.35  | 0.72  | -0.52 | 1.05  | 0.57  | 0.17  |
| AI979826                                | high mobility group 1 protein                                           | -0.06 | 1.29  | 1.61  | 0.69  | -2.02 | 0.45  | 0.11  | 0.20  |
| BU469613                                | DNA-directed RNA polymerase                                             | 0.30  | 0.80  | 1.45  | 0.21  | -0.50 | 1.14  | -0.01 | 0.38  |
| BU233555                                | DNA-binding protein Ikaros                                              | 0.62  | 1.33  | 1.97  | 0.56  | 0.22  | 0.00  | -0.43 | 0.20  |
| BE139944                                | CRM1                                                                    | 0.68  | 0.86  | 2.26  | 0.34  | -0.35 | 2.01  | 0.21  | 0.28  |
| BU207606                                | CRM1                                                                    | 0.18  | 0.38  | 2.01  | 0.18  | -0.44 | 1.61  | 0.19  | 0.19  |
| BQ293301                                | CRM1                                                                    | 1.01  | 0.85  | 2.55  | 0.64  | 0.58  | 1.74  | 0.53  | 0.23  |
| BU442833                                | C5orf5 (GAP-like protein N61)                                           | 1.05  | 1.14  | 1.48  | 0.59  | 0.29  | 0.94  | -0.09 | 0.06  |
| BU107202                                | C30B4.01c in chromosome II                                              | 1.20  | 1.09  | 0.35  | -0.19 | -0.29 | 1.70  | 0.45  | 0.88  |
| BU255725                                | C20orf141                                                               | -0.54 | -1.17 | -1.60 | -0.15 | -1.17 | -0.12 | 0.00  | 0.20  |
| AW773140                                | C1orf25                                                                 | -0.57 | -0.38 | 1.02  | 1.39  | -1.79 | 0.25  | 0.71  | 0.29  |
| BU236503                                | C1orf13                                                                 | 1.53  | 1.80  | 1.05  | 0.93  | 0.16  | -0.21 | 0.05  | 0.20  |
| BU130854                                | C18orf1                                                                 | 1.14  | 1.17  | 1.02  | 0.13  | -0.25 | 0.46  | 0.08  | 0.09  |
| <b>Translation</b>                      |                                                                         |       |       |       |       |       |       |       |       |
| BU214187                                | Polycomb complex protein RING1 (RNF1)                                   | 0.84  | 1.06  | 1.27  | 0.18  | -0.27 | 1.01  | 0.25  | 0.19  |
| AW773299                                | Eukaryotic release factor 1                                             | 0.17  | 0.68  | 1.02  | -0.34 | -1.61 | 0.45  | -0.27 | 0.17  |
| AW773115                                | Eukaryotic release factor 1                                             | 0.23  | 0.50  | 1.53  | -0.18 | -1.25 | 0.81  | -0.10 | 0.22  |
| BU394302                                | eIF-4H                                                                  | 1.09  | 1.22  | 2.24  | 0.50  | -1.30 | 2.38  | 0.13  | 0.83  |
| BU105567                                | eIF-4A-I                                                                | 0.54  | 1.35  | 1.19  | 0.76  | -1.06 | 0.72  | 0.28  | 0.66  |
| BU401453                                | eEF-1 delta chain                                                       | -1.05 | -0.90 | -1.18 | -0.60 | 0.10  | -0.57 | -0.38 | -0.39 |
| BE139833                                | poly(A) polymerase                                                      | 0.27  | 0.93  | 1.09  | 0.64  | -0.67 | 1.09  | 0.16  | 0.32  |
| BU138979                                | methionyl aminopeptidase                                                | -0.52 | -0.44 | -1.09 | -0.56 | 1.22  | -0.44 | -0.17 | -0.41 |
| BU358818                                | large subunit ribosomal protein L21e                                    | -1.04 | -1.17 | -1.03 | -0.39 | -0.40 | -0.83 | -0.52 | -0.39 |
| BU286800                                | eIF-2B gamma subunit (eIF-2B GDP-GTP exchange factor)                   | 0.88  | 0.91  | 1.07  | 0.52  | -1.80 | 0.75  | 0.76  | 0.83  |
| <b>Folding, Sorting and Degradation</b> |                                                                         |       |       |       |       |       |       |       |       |
| <i>Protein export</i>                   |                                                                         |       |       |       |       |       |       |       |       |
| BU376900                                | protein-L-isoaspartate(D-aspartate) O-methyltransferase                 | -0.96 | -0.56 | -1.42 | -0.49 | 1.26  | -0.07 | 0.19  | 0.23  |
| BU376639                                | preprotein translocase SecY subunit                                     | 0.45  | 1.25  | 1.01  | 0.24  | -0.66 | 0.91  | 0.59  | 0.45  |
| BU111087                                | preprotein translocase SecY subunit                                     | 0.79  | 0.59  | 1.74  | -0.06 | -0.69 | 1.89  | 0.24  | 0.46  |
| BU485362                                | phosphatidylinositol binding clathrin assembly protein                  | -0.02 | -0.14 | 1.33  | -0.36 | -1.29 | 1.25  | -0.10 | -0.74 |
| BU228037                                | nascent polypeptide-associated complex subunit beta                     | 1.00  | 0.77  | 1.16  | 0.38  | -0.30 | 0.00  | -0.17 | 0.05  |
| BU364844                                | clathrin, heavy polypeptide                                             | 0.78  | 0.21  | 1.18  | 0.43  | 0.39  | 1.41  | 0.33  | 0.16  |
| BU253677                                | Clathrin coat assembly protein AP50                                     | 1.20  | 1.53  | 1.16  | 0.51  | -2.56 | 1.03  | -0.01 | 1.11  |
| <i>Protein degradation</i>              |                                                                         |       |       |       |       |       |       |       |       |

|                                             |                                                                    |       |       |       |       |       |       |       |       |
|---------------------------------------------|--------------------------------------------------------------------|-------|-------|-------|-------|-------|-------|-------|-------|
| AI982065                                    | selenoprotein W                                                    | -1.13 | -0.83 | -1.07 | -0.21 | -0.98 | -0.92 | -0.26 | -0.12 |
| BU368000                                    | unc51-like kinase                                                  | -1.11 | -1.16 | -1.36 | 0.08  | 0.14  | -0.40 | 0.27  | 0.15  |
| BU468014                                    | selenoprotein SelM                                                 | -0.66 | -0.29 | -1.42 | -0.11 | -1.60 | -0.09 | -0.07 | 0.23  |
| BU371421                                    | selenoprotein P                                                    | 1.05  | 2.08  | 2.19  | 0.70  | -0.94 | 1.19  | 0.11  | 0.59  |
| BG625053                                    | selenium binding protein 2                                         | -1.47 | -1.58 | -2.16 | -0.41 | -0.01 | -0.89 | -0.45 | -0.59 |
| <i>Vesicular transport</i>                  |                                                                    |       |       |       |       |       |       |       |       |
| BU421700                                    | TOP AP                                                             | 0.66  | 0.23  | -1.10 | -0.94 | -1.06 | 0.09  | 0.43  | 0.07  |
| BU448962                                    | Sorting nexin 12                                                   | 3.06  | 3.34  | 2.10  | 1.70  | 0.50  | -0.02 | -0.12 | 0.40  |
| BU491065                                    | MOP-3                                                              | 0.33  | 0.89  | 1.35  | 0.23  | -1.37 | 1.06  | 0.15  | 0.53  |
| BU136451                                    | Coatamer beta' subunit (Beta'-coat protein)                        | 0.99  | 1.11  | 1.76  | 0.29  | -1.56 | 1.99  | 0.72  | 0.85  |
| BU132038                                    | syntaxin 5                                                         | 1.07  | 1.27  | 1.17  | 0.52  | -0.30 | 1.00  | 0.49  | 0.07  |
| BU408439                                    | syntaxin 2/3/4                                                     | 0.37  | 0.02  | 1.22  | -0.23 | -0.45 | 1.40  | -0.18 | 0.14  |
| BU357855                                    | syntaxin 2/3/4                                                     | 0.01  | 1.46  | -0.09 | 1.14  | -0.32 | -0.17 | 0.21  | 0.20  |
| BU374957                                    | syntaxin 17                                                        | -0.34 | -0.40 | -1.21 | -0.61 | 1.07  | -1.12 | -0.69 | -0.58 |
| BU245926                                    | syntaxin 16                                                        | 0.38  | 0.28  | 1.50  | -0.13 | -1.31 | 1.23  | 0.07  | -0.22 |
| BU424850                                    | synaptosomal-associated protein, 29kDa                             | 0.07  | 1.11  | 0.61  | 0.69  | -1.46 | -0.32 | 0.03  | 0.18  |
| BG625524                                    | MOP-3                                                              | 1.63  | 0.79  | 2.73  | 1.63  | 0.99  | 0.46  | 0.20  | 0.10  |
| BU420522                                    | Vacuolar assembly protein VPS41 (S53)                              | 0.55  | 0.45  | 1.44  | 0.62  | -0.57 | 1.49  | 0.69  | 0.65  |
| <i>Ubiquitin mediated proteolysis</i>       |                                                                    |       |       |       |       |       |       |       |       |
| BU342694                                    | ubiquitin-specific protease                                        | 2.24  | 1.20  | 1.20  | -0.53 | -1.26 | 0.69  | 0.06  | 0.25  |
| BU297941                                    | ubiquitin-related modifier-1                                       | -1.12 | -1.16 | -1.64 | -0.08 | 0.29  | -0.84 | -0.47 | -0.42 |
| BU492518                                    | Ubiquitin thiolesterase 7                                          | 0.80  | 0.67  | 1.27  | 0.23  | 0.26  | 1.20  | 0.75  | 0.86  |
| BF723991                                    | Ubiquitin thiolesterase 10                                         | 0.52  | 0.20  | 1.17  | -0.02 | -1.88 | 0.66  | 0.42  | 0.75  |
| BE140024                                    | Ubiquitin thiolesterase 10                                         | 0.44  | 0.51  | 1.11  | -0.25 | -2.28 | 0.57  | 0.13  | 0.50  |
| BE139954                                    | Ubiquitin thiolesterase 10                                         | 0.75  | 0.81  | 1.17  | -0.26 | -1.98 | 0.57  | 0.24  | 0.64  |
| AW773096                                    | Ubiquitin thiolesterase 10                                         | 0.54  | 0.16  | 1.21  | -0.19 | -2.29 | 0.67  | 0.25  | 0.75  |
| BE139953                                    | ubiquitin specific protease                                        | 0.42  | -0.03 | 0.95  | -0.39 | -1.10 | 1.36  | -0.17 | 0.22  |
| BU484540                                    | ubiquilin 1                                                        | 1.74  | 0.62  | 1.84  | 0.03  | -1.24 | 1.12  | 0.14  | 0.45  |
| BU363841                                    | Cullin homolog 4A (CUL-4A)                                         | -0.85 | -1.08 | -0.40 | -0.29 | 1.36  | -0.21 | -0.57 | -0.54 |
| BU120954                                    | cubilin                                                            | -0.12 | -0.39 | -1.00 | -0.26 | -1.14 | -0.21 | 0.06  | 0.22  |
| BU110639                                    | Ubiquitin-like protein SMT3A                                       | -1.51 | -0.99 | -1.83 | -0.79 | -0.32 | -0.01 | -0.22 | -0.19 |
| BU380476                                    | ubiquitin-conjugating enzyme UBE2D/E [EC:6.3.2.19]                 | 0.99  | 0.07  | 0.13  | 0.30  | -1.42 | 0.54  | 0.84  | 1.12  |
| BU207550                                    | ubiquitin-associated protein                                       | -1.46 | -1.36 | -1.38 | -0.15 | 0.45  | -0.43 | -0.19 | -0.26 |
| BE139826                                    | ubiquitin specific protease                                        | 0.87  | 1.18  | 0.48  | -0.24 | -0.32 | 1.14  | 0.00  | 0.58  |
| BU255911                                    | ubiquitin C-terminal hydrolase X4                                  | -0.81 | -0.29 | -1.07 | -0.61 | -0.94 | -1.07 | -0.60 | -0.70 |
| BU445505                                    | hect domain ubiquitin protein ligase E3 component                  | 0.64  | 0.55  | 1.32  | -0.12 | 0.27  | 1.81  | 0.46  | 0.31  |
| BF723722                                    | hect domain ubiquitin protein ligase E3 component                  | 0.68  | 1.00  | 1.44  | 0.46  | -0.41 | 0.92  | 0.41  | 0.57  |
| BU352931                                    | cullin 3                                                           | 0.31  | 0.15  | 1.76  | -0.47 | -1.37 | 2.34  | -0.53 | 0.04  |
| <i>Proteasome</i>                           |                                                                    |       |       |       |       |       |       |       |       |
| BU488154                                    | proproteinase E                                                    | 0.32  | -1.41 | -0.49 | -2.25 | -1.04 | -0.20 | -0.74 | 0.02  |
| BE139830                                    | IMP4                                                               | 0.32  | 1.15  | 1.26  | 1.49  | -0.56 | 0.97  | 0.32  | 1.10  |
| BU489708                                    | 26S proteasome regulatory subunit T5                               | 0.81  | 1.14  | 0.93  | 0.69  | -0.55 | 0.78  | 0.91  | 1.18  |
| BU216253                                    | 26S proteasome regulatory subunit N9                               | 1.00  | 1.24  | 0.77  | 0.20  | -2.51 | 0.09  | 0.14  | 0.78  |
| BF723895                                    | 26S proteasome regulatory subunit N2                               | 0.89  | 1.86  | 2.28  | 0.45  | -0.99 | 1.89  | 0.10  | 0.99  |
| BU392145                                    | 26S proteasome regulatory subunit N11                              | 0.23  | -0.05 | 1.49  | 0.53  | -0.99 | 1.13  | 0.35  | 0.37  |
| BU291311                                    | 26S proteasome non-ATPase regulatory subunit 5                     | 0.39  | -0.10 | 1.16  | 0.15  | -1.54 | 1.04  | 0.78  | 0.95  |
| <b>Replication and Repair</b>               |                                                                    |       |       |       |       |       |       |       |       |
| BU288392                                    | site-specific DNA-methyltransferase (adenine-specific)             | -1.21 | -1.25 | -1.71 | -0.49 | 0.39  | 0.01  | 0.37  | -0.24 |
| BG625465                                    | DNA topoisomerase II                                               | 0.66  | 1.66  | 1.89  | 1.06  | 0.61  | 0.55  | 0.58  | 0.25  |
| BG625124                                    | DNA topoisomerase II                                               | 0.53  | 0.08  | 1.76  | 0.03  | -0.49 | 1.87  | 0.01  | -0.02 |
| BU230607                                    | DNA repair protein Rad51                                           | 0.38  | 1.92  | 1.76  | 1.09  | 0.14  | 0.09  | 0.23  | 0.24  |
| BU388898                                    | DNA polymerase zeta subunit                                        | 0.49  | 0.30  | 1.06  | 0.02  | -0.06 | 1.03  | 0.29  | -0.08 |
| BU136587                                    | ATP-dependent DNA helicase RecQ                                    | -0.70 | -1.16 | -1.19 | -1.26 | -3.56 | -0.85 | -0.31 | -0.31 |
| <b>Environmental Information Processing</b> |                                                                    |       |       |       |       |       |       |       |       |
| <b>Membrane Transport</b>                   |                                                                    |       |       |       |       |       |       |       |       |
| BU400125                                    | Transmembrane protein 9                                            | 3.42  | 1.51  | 1.84  | 0.06  | 0.61  | -0.12 | 0.09  | -0.49 |
| BU440514                                    | Transmembrane 9 superfamily protein member 2 (p76)                 | 0.47  | 0.51  | 0.90  | -0.21 | -1.18 | 1.35  | 0.26  | 0.53  |
| BU108175                                    | Transforming acidic coiled-coil-containing protein 2 (Anti Zuai-1) | -1.03 | -1.16 | -1.63 | -0.70 | -0.45 | -0.30 | 0.05  | -0.05 |
| BU140497                                    | seven transmembrane helix receptor                                 | 1.58  | 1.55  | 0.47  | -0.25 | -0.42 | -0.27 | -0.19 | -0.06 |
| BF723884                                    | RanBP7/importin 7                                                  | 0.92  | 1.16  | 1.91  | 0.80  | -1.54 | 1.65  | 0.47  | 0.71  |
| BF723865                                    | RanBP7/importin 7                                                  | 0.32  | 0.67  | 1.97  | 0.44  | -1.72 | 1.72  | 0.17  | 0.48  |
| BE139978                                    | RanBP7/importin 7                                                  | 0.23  | 1.24  | 0.52  | 0.65  | -1.67 | 0.09  | 0.00  | 0.18  |

|                               |                                                                                           |       |       |       |       |       |       |       |       |
|-------------------------------|-------------------------------------------------------------------------------------------|-------|-------|-------|-------|-------|-------|-------|-------|
| BF723893                      | integral membrane transporter protein                                                     | 0.17  | 0.76  | 1.15  | 0.60  | -1.25 | 1.85  | -0.23 | 0.83  |
| BF723874                      | integral membrane transporter protein                                                     | 0.09  | 0.65  | 1.05  | 0.66  | -1.25 | 2.02  | 0.04  | 0.89  |
| BF723902                      | Integral membrane glycoprotein gp210                                                      | 0.34  | 1.17  | 1.85  | 1.03  | -0.14 | 1.54  | 0.34  | 0.80  |
| BE139900                      | Integral membrane glycoprotein gp210                                                      | 0.52  | 0.97  | 1.98  | 0.61  | 0.49  | 1.01  | 0.15  | 0.53  |
| BU140217                      | Importin alpha-4 subunit (Karyopherin alpha-4)                                            | 0.67  | 0.71  | 1.01  | 0.39  | 0.50  | 1.02  | 0.03  | 0.40  |
| AI981837                      | DB83 protein                                                                              | 1.33  | 0.95  | 1.76  | 0.34  | 0.02  | 1.08  | 0.41  | 0.11  |
| BF724031                      | beta'-coat protein (Beta'-COP)                                                            | 0.18  | 0.09  | 0.60  | -0.17 | -1.04 | 1.26  | 0.28  | 0.42  |
| BG625572                      | Importin alpha-2 subunit (Karyopherin alpha-2 subunit)                                    | -0.12 | 2.33  | 2.40  | 1.63  | 0.73  | 0.11  | -0.11 | -0.01 |
| BU117163                      | ATP-binding cassette, subfamily B, bacterial                                              | 1.41  | 2.56  | 1.18  | -0.43 | 0.74  | -0.71 | -0.68 | -0.06 |
| BE139817                      | ATP-binding cassette, subfamily B (MDR/TAP), member 10                                    | 0.37  | 1.26  | 2.10  | 1.18  | -1.00 | 2.62  | 0.48  | 1.42  |
| BU420728                      | ATP synthase F0 chain 6                                                                   | -0.95 | -1.27 | -1.10 | -0.21 | 0.56  | -0.07 | 0.12  | 0.06  |
| <b>Pores ion channels</b>     |                                                                                           |       |       |       |       |       |       |       |       |
| BU116565                      | solute carrier family 8 (sodium/calcium exchanger)                                        | 2.56  | 1.45  | 1.43  | 0.25  | -0.17 | 0.32  | 0.27  | 0.64  |
| BU425927                      | solute carrier family 2                                                                   | 2.50  | 1.74  | 1.38  | 0.17  | 0.36  | -0.76 | -0.83 | -0.16 |
| BU397087                      | Sodium/glucose cotransporter 1                                                            | -1.65 | -0.61 | -1.72 | -1.39 | -0.03 | -0.80 | -0.65 | -0.76 |
| BU293982                      | mitochondrial carrier protein, MC family                                                  | -0.23 | 0.18  | -0.47 | 0.67  | -2.50 | 0.22  | -0.06 | 1.43  |
| BG625692                      | heat shock 70kDa protein 5                                                                | 0.98  | 0.35  | 1.22  | -0.40 | -1.04 | 0.94  | 0.30  | 0.80  |
| BU432595                      | cation efflux system protein, CDF family                                                  | -0.49 | -0.42 | -1.23 | -1.58 | -0.19 | -0.88 | -0.89 | -1.01 |
| BU239564                      | Solute carrier family 12 member 2                                                         | -2.19 | -1.32 | -1.52 | -0.85 | -0.44 | -0.67 | -0.69 | -0.59 |
| BU117167                      | Potassium channel Kv6.1                                                                   | -1.07 | -0.67 | -1.84 | -0.58 | 0.08  | -0.83 | -0.66 | -0.11 |
| BU229098                      | Potassium channel Kv1.3                                                                   | 0.82  | 1.10  | 1.15  | 0.25  | -0.21 | -0.22 | -0.05 | 0.14  |
| BU375032                      | Na(+)/L-ascorbic acid transporter 1                                                       | -1.37 | -0.39 | -0.98 | 0.44  | -0.41 | -1.14 | -0.45 | -0.17 |
| BU457177                      | Minimum potassium ion channel-related peptide 2(MiRP2)                                    | -1.22 | -1.01 | -1.97 | 0.12  | -0.48 | -0.31 | 0.06  | 0.01  |
| BU435317                      | peroxisomal Ca-dependent solute carrier                                                   | 0.77  | 0.99  | 1.90  | 0.56  | -0.39 | 1.61  | 0.26  | 0.51  |
| BU257603                      | potassium channel subfamily K member 16 (TWIK-related alkaline pH activated K+ channel 1) | 1.11  | -0.03 | -0.53 | -1.37 | 0.18  | -1.03 | -0.64 | -0.62 |
| BU373407                      | chloride channel ClC-K1                                                                   | -1.21 | -1.05 | -1.83 | -0.77 | 0.08  | -0.33 | -0.04 | 0.22  |
| <b>Signal Transduction</b>    |                                                                                           |       |       |       |       |       |       |       |       |
| <b>MAPK signaling pathway</b> |                                                                                           |       |       |       |       |       |       |       |       |
| BU326679                      | Ras-related protein Rab-35 (Rab-1C)                                                       | 0.83  | 0.68  | 1.34  | 0.01  | -1.23 | 1.20  | -0.08 | 0.31  |
| BU432543                      | Ras-like protein TC21                                                                     | -0.20 | -0.39 | -1.64 | -1.65 | 1.21  | -0.70 | -0.47 | -0.59 |
| BG625177                      | Ras association domain family 2                                                           | 2.21  | 2.01  | 0.82  | 1.07  | 0.02  | -0.09 | -0.24 | -0.02 |
| BU110141                      | Protein tyrosine phosphatase-like protein                                                 | -0.52 | -0.61 | -1.18 | -0.99 | -1.04 | -0.89 | -0.69 | -0.58 |
| BU380848                      | protein tyrosine phosphatase                                                              | 2.22  | 1.67  | 1.39  | 0.56  | 0.86  | 0.41  | 0.49  | 0.57  |
| BU395253                      | Protein tyrosine phosphatase                                                              | -0.56 | -0.49 | 1.41  | -0.74 | -0.95 | 1.01  | -0.32 | -0.07 |
| AI981975                      | Protein Tara (Trio-associated repeat on actin)                                            | 1.53  | 1.14  | 0.96  | 0.72  | 0.32  | 0.43  | 0.43  | 0.27  |
| AJ455571                      | protein phosphatase 2A                                                                    | -0.80 | -1.09 | -2.00 | -0.78 | 0.25  | -0.57 | -0.01 | -0.72 |
| BU207907                      | Protein kinase A anchoring protein 9                                                      | 1.33  | 1.07  | 0.90  | 0.72  | -0.67 | 0.02  | 0.54  | 0.65  |
| BU224879                      | MAPKK like protein kinase                                                                 | 0.48  | 1.42  | 1.02  | 0.98  | -0.14 | -0.05 | 0.15  | 0.24  |
| BU374461                      | guanine nucleotide-exchange factor                                                        | 1.23  | 0.74  | 2.24  | 0.07  | 0.36  | 2.73  | 0.28  | 0.64  |
| AJ454713                      | Guanine nucleotide-binding protein (Receptor of activated protein kinase C 1)             | 2.33  | 0.37  | 0.63  | 0.33  | 1.19  | 0.98  | 0.74  | 0.51  |
| BU203681                      | guanine nucleotide exchange factor Lbc                                                    | 0.40  | 0.44  | 2.08  | 0.19  | -0.43 | 1.22  | 0.18  | 0.05  |
| BU442289                      | G-protein coupled receptor GPR34                                                          | 0.14  | 1.21  | 2.02  | 1.66  | 0.11  | 0.11  | 0.29  | 0.70  |
| AI979950                      | stathmin 1/oncoprotein 18                                                                 | -0.32 | 0.82  | 1.03  | 1.18  | 0.61  | -0.19 | -0.29 | 0.08  |
| BU369608                      | Serine/threonine-protein kinase NEK4                                                      | -1.28 | -1.42 | -1.81 | -0.25 | 1.04  | -0.31 | -0.17 | -0.33 |
| BU464167                      | Serine/threonine-protein kinase ALS2CR7                                                   | -2.07 | -2.91 | -3.11 | -0.25 | 0.43  | -0.63 | -0.17 | -0.62 |
| BU221831                      | Serine/threonine-protein kinase (Cyclin-dependent kinase-like 1)                          | -1.31 | -1.88 | -3.70 | -0.83 | 0.07  | 0.00  | 0.35  | 0.35  |
| BU335111                      | serine/threonine protein kinase                                                           | -0.22 | 0.85  | 1.05  | 0.27  | -1.77 | 1.02  | -0.33 | -0.12 |
| BU131159                      | serine/threonine kinase                                                                   | -0.89 | 1.65  | 1.72  | 1.27  | 1.83  | -0.04 | -0.27 | -0.05 |
| BU223019                      | Rho guanine nucleotide exchange factor 7 (PAK-interacting exchange factor beta)           | 1.90  | 0.19  | 0.32  | 0.36  | 1.34  | 0.66  | 0.82  | 0.15  |
| AI981179                      | Ras-related protein Rab-8B                                                                | 2.09  | 1.83  | 2.05  | 1.08  | -0.38 | 0.02  | 0.16  | 0.35  |
| BU231256                      | Ras-related protein Rab-5A                                                                | 1.31  | 0.72  | 1.01  | 0.32  | -1.33 | 0.72  | 0.45  | 0.65  |
| BU228424                      | Ras-GTPase-activating protein binding protein 2                                           | 0.85  | 1.03  | 0.49  | 0.23  | -1.03 | 0.62  | 0.36  | 1.15  |
| BU203976                      | RAF proto-oncogene serine/threonine-protein kinase                                        | 1.14  | 0.95  | 1.80  | 0.74  | -0.29 | 2.19  | 0.52  | 1.10  |
| BU450375                      | protein phosphatase 1B (formerly 2C)                                                      | 0.12  | -0.01 | 0.99  | -0.81 | -2.15 | 1.67  | 0.10  | 0.37  |
| BU458393                      | phospholipase A2                                                                          | 0.87  | 0.11  | -0.79 | -1.07 | -0.11 | -1.08 | -0.83 | -0.69 |
| BU218261                      | mitogen-activated protein kinase 8 interacting protein 1                                  | -1.40 | -0.90 | -1.43 | -0.23 | 0.02  | -1.01 | -0.70 | -0.48 |
| BU471002                      | mitogen-,stress activated protein kinases                                                 | 1.21  | 1.07  | 0.90  | 1.23  | 1.98  | 0.68  | 0.77  | 0.50  |
| BU345870                      | brain-derived neurotrophic factor                                                         | -0.59 | -1.19 | -1.11 | -0.44 | 2.29  | -0.66 | -0.28 | -0.04 |
| BU222264                      | Tyrosine-protein kinase-like 7                                                            | -1.17 | -1.12 | -1.02 | -0.40 | -0.03 | -0.59 | -0.23 | -0.57 |

|                                              |                                                                      |       |       |       |       |       |       |       |       |  |
|----------------------------------------------|----------------------------------------------------------------------|-------|-------|-------|-------|-------|-------|-------|-------|--|
| BU232667                                     | RhoGAP                                                               | 0.00  | -0.26 | -0.92 | -1.12 | -1.09 | -0.40 | -0.77 | -0.42 |  |
| BG625427                                     | Regulator of G-protein signaling 18 (RGS18)                          | 3.46  | 2.56  | 2.54  | 1.42  | 1.24  | 0.09  | 0.36  | 0.44  |  |
| AI981146                                     | Regulator of G-protein signaling 18 (RGS18)                          | 1.40  | 0.89  | 1.38  | 0.44  | 0.73  | -0.50 | -0.54 | -0.49 |  |
| BU341596                                     | brain-enriched WD-repeat protein                                     | 1.05  | 1.09  | 1.02  | 0.24  | -0.79 | 0.65  | 0.15  | 0.46  |  |
| BU345260                                     | Brain lipid-binding protein                                          | 0.59  | 1.40  | 0.67  | 1.38  | 0.24  | 0.20  | -0.36 | -0.22 |  |
| <b>Wnt signaling pathway</b>                 |                                                                      |       |       |       |       |       |       |       |       |  |
| BG625586                                     | transcription factor 7 (T-cell specific, HMG-box) (TCF7)             | 0.81  | 1.03  | 1.62  | 0.22  | -0.18 | -0.38 | -0.19 | -0.22 |  |
| BU366914                                     | wingless-type MMTV integration site family, member 7                 | 0.62  | -0.19 | 0.02  | -1.04 | -1.76 | -0.02 | -0.85 | -0.35 |  |
| BU418913                                     | wingless-type MMTV integration site family, member 4                 | -1.19 | -0.52 | -1.49 | -0.62 | -0.83 | -0.33 | 0.11  | 0.17  |  |
| BU265818                                     | secreted frizzled-related protein 5                                  | 0.89  | 0.98  | 1.19  | 0.68  | -1.39 | 0.13  | 0.55  | 0.76  |  |
| BU230817                                     | protein phosphatase 2 (formerly 2A), regulatory subunit B            | 0.86  | 0.75  | 1.13  | -0.18 | -1.61 | 0.98  | 0.08  | 0.28  |  |
| BG625536                                     | presenilin-1                                                         | 0.55  | 0.66  | 1.17  | 0.57  | 0.98  | 1.31  | 0.48  | 0.52  |  |
| BU376258                                     | matrix metalloproteinase                                             | 7.36  | 5.57  | 4.81  | 4.00  | 2.64  | 1.24  | 0.68  | 0.46  |  |
| BU212707                                     | groucho                                                              | 1.31  | -0.08 | 0.05  | -1.92 | -1.65 | 0.37  | -1.07 | -0.06 |  |
| BU478867                                     | dishevelled associated activator of morphogenesis                    | -1.07 | -1.35 | -1.99 | -0.90 | 0.46  | -0.60 | 0.25  | -0.27 |  |
| <b>Notch/Hedgehog/TGF signaling pathway</b>  |                                                                      |       |       |       |       |       |       |       |       |  |
| BU264071                                     | NOTCH4-like protein                                                  | -0.27 | -0.02 | -1.26 | -0.55 | -1.15 | -0.36 | -0.16 | -0.17 |  |
| BU384463                                     | recombining binding protein suppressor of hairless                   | 0.45  | 1.03  | 1.22  | 0.14  | -1.37 | 0.27  | -0.03 | -0.07 |  |
| BU263595                                     | Notch                                                                | -1.33 | -0.83 | -1.57 | -0.57 | 0.12  | -0.50 | -0.24 | -0.37 |  |
| BU331230                                     | hairy and enhancer of split 1                                        | -1.27 | -1.01 | -0.82 | -0.55 | -0.94 | -0.77 | -0.59 | -0.78 |  |
| BU259215                                     | delta                                                                | -0.29 | -1.19 | -1.24 | -0.79 | -0.37 | -0.65 | -0.14 | -0.48 |  |
| BU132134                                     | hedgehog interacting protein                                         | -0.25 | -1.04 | -0.01 | -0.29 | -1.10 | 0.52  | -0.23 | -0.46 |  |
| BU329368                                     | casein kinase 1                                                      | 1.24  | 0.60  | 1.31  | -0.11 | -1.92 | 1.29  | 0.44  | 0.40  |  |
| BU459997                                     | casein kinase 1                                                      | 0.40  | 0.26  | 0.87  | -0.21 | -1.75 | 1.04  | 0.08  | 0.50  |  |
| BU107503                                     | transforming growth factor, beta                                     | -0.35 | -0.27 | -1.23 | -1.13 | -1.85 | -0.28 | -0.19 | -0.44 |  |
| BU108381                                     | kinase-deficient TGFbeta superfamily receptor subunit                | -0.92 | -1.16 | -1.78 | -1.17 | 0.37  | -0.30 | -0.05 | -0.34 |  |
| BU460394                                     | Transformer-2 protein homolog (TRA-2 alpha)                          | 2.04  | 1.23  | 2.26  | 0.84  | -0.88 | 1.76  | 0.80  | 0.67  |  |
| BU371770                                     | SMAD, mothers against DPP 1/5/8                                      | -0.16 | 0.60  | -0.66 | -0.09 | -1.47 | 0.52  | -1.11 | 0.87  |  |
| BU458294                                     | inhibitor of DNA binding, dominant negative helix-loop-helix protein | 1.33  | 0.99  | 1.09  | 0.97  | -0.57 | 0.45  | 0.28  | 0.73  |  |
| BU388226                                     | follistatin                                                          | 2.09  | 0.82  | 0.21  | -1.07 | -1.01 | 0.05  | -0.35 | -0.13 |  |
| <b>Jak-STAT signaling pathway</b>            |                                                                      |       |       |       |       |       |       |       |       |  |
| AI980522                                     | Signal transducer and activator of transcription 1-alpha/beta        | 2.25  | 1.41  | 1.63  | 0.30  | -0.10 | 0.12  | 0.16  | -0.20 |  |
| AI981631                                     | suppressor of cytokine signaling 3                                   | 3.05  | 1.50  | 1.07  | 0.14  | 0.16  | -0.04 | -0.15 | -0.03 |  |
| BU130477                                     | sprouty                                                              | -1.03 | -0.66 | -1.33 | -0.74 | -0.44 | -0.46 | -0.26 | -0.29 |  |
| BU419580                                     | signal transducer and activator of transcription 4                   | 1.75  | 1.33  | 1.56  | 0.51  | -0.32 | -0.24 | -0.23 | 0.16  |  |
| BG625531                                     | Signal transducer and activator of transcription 1-alpha/beta        | 2.27  | 1.40  | 1.57  | 0.44  | -0.31 | 0.11  | 0.16  | 0.05  |  |
| BU447887                                     | Signal transducer and activator of transcription 1                   | 1.48  | 0.37  | 1.57  | 0.46  | 0.72  | 0.60  | 0.68  | 0.07  |  |
| BU391035                                     | signal transducer and activator of transcription 1                   | 2.88  | 1.74  | 2.05  | 0.29  | 0.38  | 0.22  | 0.01  | -0.33 |  |
| AI981754                                     | signal transducer and activator of transcription 1                   | 2.57  | 1.77  | 1.89  | 0.49  | -0.59 | 0.32  | 0.31  | 0.01  |  |
| BU435192                                     | signal transducer and activator of transcription                     | 0.76  | 1.35  | 1.64  | 0.12  | -0.89 | 0.92  | 0.19  | 0.95  |  |
| BU261230                                     | proto-oncogene serine/threonine-protein kinase Pim-1                 | 1.78  | 1.42  | 0.98  | 0.35  | -0.92 | -0.20 | -0.31 | 0.51  |  |
| BU280058                                     | phosphoinositide-3-kinase, regulatory subunit                        | -0.08 | -0.65 | 0.60  | -0.22 | -1.48 | 1.30  | 0.11  | 0.18  |  |
| BU418102                                     | fetal liver LKB1-interacting protein                                 | 1.37  | 0.90  | 1.10  | 0.02  | -0.55 | 1.09  | 0.22  | 0.23  |  |
| BU377655                                     | suppression of tumorigenicity 6, prostate; CD82 antigen              | 1.00  | 1.13  | 1.28  | 0.83  | 0.05  | 1.97  | 0.06  | 1.38  |  |
| <b>Calcium signaling pathway</b>             |                                                                      |       |       |       |       |       |       |       |       |  |
| BU119620                                     | DEAD-box protein abstract                                            | 0.04  | 0.87  | 1.12  | 0.69  | -0.97 | 1.43  | -0.06 | 1.21  |  |
| BU349778                                     | ryanodine receptor 2 (cardiac)                                       | -0.25 | -1.13 | -1.38 | -0.90 | -2.32 | -0.77 | -0.23 | -0.01 |  |
| BU107490                                     | phosphorylase kinase alpha/beta subunit                              | -1.28 | -1.20 | -1.16 | -0.55 | -0.01 | -0.10 | -0.21 | -0.91 |  |
| BU441821                                     | calcium channel, voltage-dependent, L type, alpha 1S subunit         | -0.73 | 0.22  | -1.02 | -1.58 | -0.57 | -0.54 | -0.40 | -0.07 |  |
| BU364025                                     | calcium channel, voltage-dependent, gamma subunit 4                  | 1.28  | 1.88  | 1.78  | 1.06  | 1.94  | 0.31  | 0.27  | 0.91  |  |
| BU454596                                     | calcium channel, voltage-dependent, alpha 2/delta subunit 1          | -0.24 | -0.09 | 0.27  | -1.12 | -1.17 | 0.60  | -0.26 | 0.32  |  |
| BU234595                                     | calcium channel, voltage-dependent, alpha 2/delta subunit 1          | -0.76 | -0.74 | -0.46 | -1.23 | 1.58  | -0.44 | -0.56 | 0.05  |  |
| BU335410                                     | Calcitonin                                                           | 1.91  | 2.49  | 1.70  | 1.84  | 1.78  | -0.17 | -0.62 | 0.02  |  |
| BU354796                                     | Ca2+ transporting ATPase, sarcoplasmic/endoplasmic reticulum         | 1.18  | 0.88  | 1.18  | 0.03  | -2.16 | 1.21  | 0.50  | 0.88  |  |
| BU329920                                     | Calcium-binding mitochondrial carrier protein Aralar2                | 0.77  | 0.41  | 2.08  | 0.62  | -0.41 | 1.68  | 0.43  | 0.38  |  |
| BU295022                                     | Calcium-binding mitochondrial carrier protein Aralar2                | 0.50  | 1.13  | 0.88  | 0.17  | -2.01 | 1.01  | 0.13  | 0.61  |  |
| BU205207                                     | calcium-activated potassium channel                                  | 3.06  | 2.00  | 2.23  | 1.41  | 0.64  | -0.22 | -0.12 | -0.11 |  |
| <b>Phosphatidylinositol signaling system</b> |                                                                      |       |       |       |       |       |       |       |       |  |
| BU466524                                     | phospholipase C, delta                                               | -0.76 | -1.24 | -1.22 | -1.35 | -3.15 | -0.72 | -0.57 | -0.13 |  |
| BU244725                                     | phospholipase C, delta                                               | 0.14  | -0.49 | -1.10 | -0.90 | -1.53 | -0.82 | -0.54 | -0.48 |  |
| BU435118                                     | 1-phosphatidylinositol-4-phosphate 5-kinase                          | -0.44 | -0.68 | -0.49 | -0.30 | -0.62 | -0.60 | -1.07 | -1.15 |  |

|                                                                     |                                                                                    |       |       |       |       |       |       |       |       |  |
|---------------------------------------------------------------------|------------------------------------------------------------------------------------|-------|-------|-------|-------|-------|-------|-------|-------|--|
| BU203392                                                            | 1-phosphatidylinositol-4-phosphate 5-kinase                                        | -0.86 | -0.92 | -1.19 | -0.64 | -1.55 | -0.86 | -0.65 | -0.26 |  |
| BU273698                                                            | 8-oxo-7,8-dihydroguanosine triphosphatase                                          | 0.29  | 0.11  | 1.05  | 0.07  | 0.40  | 1.02  | 0.25  | 0.21  |  |
| <b>Neuroactive ligand-receptor interaction</b>                      |                                                                                    |       |       |       |       |       |       |       |       |  |
| AI981966                                                            | purinergic receptor P2Y, G protein-coupled, 5                                      | 2.72  | 1.97  | 1.25  | 0.86  | 1.34  | 0.58  | 0.63  | 0.36  |  |
| BU260753                                                            | purinergic receptor P2Y, G protein-coupled, 10                                     | -1.10 | -0.57 | -1.33 | -0.41 | 0.65  | -0.60 | -0.06 | -0.50 |  |
| BU394374                                                            | purinergic receptor P2X-like 1, orphan receptor                                    | -1.47 | -1.47 | -2.21 | 0.03  | 0.11  | -0.05 | 0.14  | 0.15  |  |
| BU363297                                                            | purinergic receptor P2X-like 1, orphan receptor                                    | -1.50 | -1.27 | -2.38 | 0.18  | -0.32 | -0.09 | 0.07  | 0.37  |  |
| BU300946                                                            | purinergic receptor P2X, ligand-gated ion channel 7                                | 3.12  | 2.04  | 2.74  | 0.72  | -1.23 | 0.48  | 0.44  | 0.83  |  |
| AI981624                                                            | purinergic receptor P2X, ligand-gated ion channel 7                                | 2.42  | 1.20  | 1.62  | 0.70  | 0.89  | 0.20  | 0.30  | 0.37  |  |
| BU219878                                                            | opioid receptor, mu 1                                                              | -1.03 | -1.02 | -1.15 | -0.91 | 0.08  | -0.68 | -0.41 | -0.52 |  |
| BU410186                                                            | neutral sphingomyelinase II                                                        | -1.05 | -1.22 | -1.07 | -0.48 | -1.33 | 0.38  | 0.41  | 0.03  |  |
| BU140605                                                            | neuronal transmembrane protein Slitrk4                                             | -0.03 | -0.57 | -1.26 | -1.33 | -0.31 | -0.59 | -0.44 | -0.50 |  |
| BU315177                                                            | neurofascin                                                                        | -1.08 | -1.21 | -1.84 | 0.65  | 1.03  | -0.41 | 0.34  | -0.50 |  |
| BU387687                                                            | leucine-rich repeat-containing G protein-coupled receptor 4                        | -0.37 | -0.46 | -0.36 | -1.00 | -1.19 | 0.65  | 0.30  | -0.71 |  |
| BG625508                                                            | granzyme A                                                                         | 2.20  | 1.03  | 4.18  | 2.69  | 2.05  | -0.21 | -0.19 | -0.31 |  |
| BU140374                                                            | glutamate receptor, ionotropic, kainate 1                                          | 0.00  | 0.03  | -1.72 | -0.60 | 1.25  | -0.77 | 0.03  | 0.18  |  |
| BF723775                                                            | coatamer protein complex, subunit alpha (xenin)                                    | 0.56  | 1.07  | 0.84  | -0.04 | -1.94 | 0.57  | -0.01 | 0.66  |  |
| BU348590                                                            | amiloride-sensitive cation channel 1, neuronal (degenerin)                         | -0.90 | -1.54 | -2.03 | -1.30 | -0.77 | -0.21 | 0.19  | 0.03  |  |
| BU470110                                                            | endothelin receptor type B                                                         | 2.12  | 0.28  | 0.18  | -0.94 | -1.06 | -0.10 | -0.01 | -0.04 |  |
| <b>Cytokine-cytokine receptor interaction</b>                       |                                                                                    |       |       |       |       |       |       |       |       |  |
| BU118152                                                            | Macrophage colony stimulating factor I receptor (CSF-1-R)                          | 1.78  | 1.73  | 0.49  | 0.18  | -0.04 | -0.42 | -0.17 | -0.14 |  |
| AW061439                                                            | common cytokine receptor gamma chain                                               | 0.88  | 1.21  | 1.39  | 1.23  | 0.50  | -0.10 | -0.07 | 0.47  |  |
| AI981893                                                            | Macrophage colony-stimulating factor 1 receptor                                    | 1.79  | 1.48  | 0.87  | 0.22  | -0.12 | -0.23 | -0.12 | -0.18 |  |
| BU468733                                                            | interleukin 2 receptor, gamma                                                      | 1.28  | 2.02  | 2.14  | 1.51  | -0.89 | 0.08  | 0.05  | 0.99  |  |
| BU322177                                                            | interleukin 10 receptor, beta                                                      | 2.78  | 1.24  | 0.74  | 0.24  | -1.19 | 0.19  | 0.37  | 0.19  |  |
| BU252836                                                            | Cytokine-like protein C17                                                          | 0.81  | -0.13 | -0.25 | -0.98 | -0.18 | 1.16  | 1.15  | 1.44  |  |
| AI980308                                                            | common cytokine receptor gamma chain                                               | 0.86  | 0.95  | 1.25  | 1.03  | 0.09  | -0.02 | 0.00  | 0.58  |  |
| BU238599                                                            | colony-stimulating factor 2 receptor, alpha, low-affinity (granulocyte-macrophage) | 3.06  | 2.28  | 1.96  | 0.85  | 0.00  | -0.17 | -0.24 | 0.27  |  |
| AI981893                                                            | colony-stimulating factor 1 receptor                                               | 1.79  | 1.48  | 0.87  | 0.22  | -0.12 | -0.23 | -0.12 | -0.18 |  |
| AI980712                                                            | chemokine ah221                                                                    | 2.48  | 1.24  | 1.34  | 0.03  | 1.12  | -0.26 | -0.42 | -0.19 |  |
| AJ397912                                                            | chemokine (C-X-C motif) receptor 4                                                 | 1.08  | 1.01  | 1.54  | 0.71  | 1.58  | 0.41  | 0.16  | 0.35  |  |
| AI981253                                                            | chemokine (C-X-C motif) receptor 4                                                 | 1.07  | 1.10  | 1.57  | 0.73  | 1.15  | 0.45  | 0.39  | 0.32  |  |
| AI980458                                                            | chemokine (C-X-C motif) ligand / Embryo fibroblast protein 1 (EMF-1)               | 4.22  | 2.71  | 2.49  | 0.32  | 1.42  | 1.94  | 0.06  | 0.72  |  |
| BU267610                                                            | chemokine (C-C motif) receptor 6                                                   | 1.01  | 1.31  | 1.15  | 0.73  | 0.45  | 0.24  | 0.49  | 0.74  |  |
| BU397782                                                            | chemokine (C-C motif) ligand/ ah294                                                | 0.97  | 2.81  | 1.91  | 2.67  | 0.99  | 0.67  | 0.73  | 0.97  |  |
| BU322222                                                            | chemokine (C-C motif) ligand 3/4                                                   | 2.82  | 1.64  | 1.32  | 0.87  | 0.77  | 0.10  | 0.58  | 0.34  |  |
| AI982103                                                            | chemokine (C-C motif) ligand / chemokine ah294                                     | 0.39  | 1.45  | 0.95  | 1.64  | 0.91  | 0.01  | 0.31  | 0.42  |  |
| BU457013                                                            | chemokine C-C motif receptor-like 1                                                | -0.76 | -0.87 | -1.39 | -1.04 | 0.15  | -0.22 | -0.03 | -0.32 |  |
| BU264036                                                            | Cab45 (Stromal cell-derived factor 4, SDF-4)                                       | 0.81  | 1.50  | 1.03  | 1.51  | -0.15 | 0.51  | -0.22 | -0.19 |  |
| <b>Cell adhesion molecules (CAMs) &amp;ECM-receptor interaction</b> |                                                                                    |       |       |       |       |       |       |       |       |  |
| BU106456                                                            | CEF-10 protein                                                                     | 0.88  | -0.58 | -1.94 | -1.37 | -1.41 | -1.13 | -1.94 | -1.63 |  |
| AW773266                                                            | Cadherin 1; Epithelial cadherin                                                    | 0.54  | 1.63  | 2.14  | 1.47  | -0.80 | 2.69  | 0.49  | 1.54  |  |
| AW773263                                                            | Cadherin 1; Epithelial cadherin                                                    | 0.62  | 2.07  | 2.54  | 1.75  | -0.57 | 2.60  | 0.06  | 1.62  |  |
| BE139732                                                            | Cadherin 1; Epithelial cadherin                                                    | 0.14  | 1.27  | 1.82  | 1.29  | -1.50 | 1.77  | 0.45  | 1.29  |  |
| AW773310                                                            | Cadherin 1; Epithelial cadherin                                                    | 0.52  | 1.84  | 2.08  | 1.62  | -1.17 | 1.67  | 0.54  | 1.46  |  |
| AW773131                                                            | Cadherin 1; Epithelial cadherin                                                    | 0.64  | 1.97  | 2.65  | 1.90  | -0.97 | 2.82  | 0.40  | 1.72  |  |
| AW773264                                                            | Cadherin 1; Epithelial cadherin                                                    | 0.21  | 1.04  | 1.66  | 1.18  | -0.54 | 2.12  | 0.56  | 1.13  |  |
| AW773186                                                            | Cadherin 1; Epithelial cadherin                                                    | 0.28  | 1.71  | 1.45  | 1.35  | -1.56 | 1.50  | 0.79  | 0.84  |  |
| AW773181                                                            | Cadherin 1; Epithelial cadherin                                                    | 0.54  | 1.66  | 2.26  | 1.48  | -1.47 | 2.80  | 0.18  | 1.61  |  |
| AW773107                                                            | Cadherin 1; Epithelial cadherin                                                    | 0.33  | 1.05  | 1.42  | 0.80  | 0.50  | 1.73  | 0.16  | 0.87  |  |
| AW773102                                                            | Cadherin 1; Epithelial cadherin                                                    | 0.56  | 1.65  | 2.17  | 1.47  | -1.14 | 2.60  | 0.19  | 1.72  |  |
| BF845757                                                            | Cadherin 1; Epithelial cadherin                                                    | 0.36  | 1.70  | 1.91  | 1.36  | -2.04 | 2.27  | 0.63  | 1.41  |  |
| BF845753                                                            | Cadherin 1; Epithelial cadherin                                                    | 0.24  | 1.23  | 2.09  | 1.33  | -0.97 | 2.67  | 0.16  | 1.36  |  |
| BF845752                                                            | Cadherin 1; Epithelial cadherin                                                    | 0.73  | 1.88  | 2.57  | 1.72  | -1.17 | 2.82  | 0.49  | 1.71  |  |
| BF845751                                                            | Cadherin 1; Epithelial cadherin                                                    | 0.59  | 2.19  | 2.36  | 2.01  | -0.16 | 1.90  | 0.14  | 1.52  |  |
| BF845747                                                            | Cadherin 1; Epithelial cadherin                                                    | 0.22  | 1.89  | 1.96  | 1.76  | -0.11 | 1.75  | 0.01  | 1.37  |  |
| BF845746                                                            | Cadherin 1; Epithelial cadherin                                                    | 0.08  | 1.33  | 1.24  | 1.01  | -0.71 | 1.02  | 0.47  | 0.51  |  |
| BF845728                                                            | Cadherin 1; Epithelial cadherin                                                    | 0.33  | 1.06  | 1.30  | 0.84  | -0.15 | 1.25  | 0.26  | 0.39  |  |
| BF723970                                                            | Cadherin 1; Epithelial cadherin                                                    | 0.54  | 1.42  | 2.27  | 1.37  | -1.38 | 2.94  | 0.66  | 1.74  |  |
| BF723957                                                            | Cadherin 1; Epithelial cadherin                                                    | 0.51  | 1.42  | 1.93  | 1.28  | -1.58 | 2.97  | 0.29  | 1.53  |  |



|          |                                                                          |       |       |       |       |       |       |       |       |
|----------|--------------------------------------------------------------------------|-------|-------|-------|-------|-------|-------|-------|-------|
| BF723921 | Cadherin 1; Epithelial cadherin                                          | 0.47  | 1.97  | 2.39  | 1.87  | -0.36 | 2.14  | 0.04  | 1.49  |
| BF723897 | Cadherin 1; Epithelial cadherin                                          | 0.48  | 1.84  | 2.31  | 1.70  | -0.62 | 2.13  | -0.17 | 1.32  |
| BF723891 | Cadherin 1; Epithelial cadherin                                          | 0.23  | 1.80  | 1.94  | 1.68  | -0.06 | 1.44  | -0.44 | 1.00  |
| BF723885 | Cadherin 1; Epithelial cadherin                                          | 0.42  | 0.96  | 1.44  | 0.80  | 0.37  | 1.86  | 0.33  | 1.15  |
| BF723870 | Cadherin 1; Epithelial cadherin                                          | 0.77  | 2.29  | 2.44  | 2.11  | 0.02  | 2.08  | 0.33  | 1.71  |
| BF723835 | Cadherin 1; Epithelial cadherin                                          | 0.04  | 0.66  | 1.44  | 1.33  | -1.92 | 1.44  | 0.89  | 0.96  |
| BF723822 | Cadherin 1; Epithelial cadherin                                          | 0.30  | 0.81  | 1.37  | 0.77  | 0.40  | 1.72  | 0.25  | 0.59  |
| BF723813 | Cadherin 1; Epithelial cadherin                                          | 0.55  | 2.00  | 2.31  | 1.91  | -0.17 | 1.91  | 0.04  | 1.45  |
| BF723770 | Cadherin 1; Epithelial cadherin                                          | 0.39  | 1.03  | 1.38  | 0.64  | -1.12 | 1.66  | 0.19  | 1.06  |
| BF723749 | Cadherin 1; Epithelial cadherin                                          | 0.50  | 1.59  | 2.35  | 1.36  | -1.40 | 2.79  | 0.13  | 1.56  |
| BF723739 | Cadherin 1; Epithelial cadherin                                          | 0.58  | 1.70  | 2.49  | 1.67  | -1.42 | 2.93  | -0.01 | 1.77  |
| BF723737 | Cadherin 1; Epithelial cadherin                                          | 0.37  | 1.70  | 1.90  | 1.24  | -0.99 | 1.80  | 0.60  | 1.21  |
| BF723706 | Cadherin 1; Epithelial cadherin                                          | 0.40  | 1.77  | 2.01  | 1.78  | -0.21 | 1.88  | -0.09 | 1.56  |
| BF723697 | Cadherin 1; Epithelial cadherin                                          | 0.46  | 1.74  | 2.31  | 1.62  | -0.77 | 2.35  | 0.00  | 1.61  |
| BF723690 | Cadherin 1; Epithelial cadherin                                          | 0.35  | 1.62  | 1.99  | 1.50  | -1.77 | 2.19  | 0.52  | 1.43  |
| BE140005 | Cadherin 1; Epithelial cadherin                                          | 0.25  | 0.89  | 1.93  | 0.79  | -1.32 | 2.29  | 0.45  | 1.38  |
| BE140003 | Cadherin 1; Epithelial cadherin                                          | 0.49  | 1.59  | 2.38  | 1.49  | -1.42 | 2.51  | -0.22 | 1.51  |
| BE139992 | Cadherin 1; Epithelial cadherin                                          | 0.10  | 1.01  | 1.54  | 1.06  | -0.34 | 1.88  | 0.33  | 0.95  |
| BE139983 | Cadherin 1; Epithelial cadherin                                          | 0.59  | 1.75  | 2.49  | 1.60  | -1.55 | 2.72  | 0.17  | 1.90  |
| BE139964 | Cadherin 1; Epithelial cadherin                                          | 0.03  | 1.15  | 1.24  | 0.96  | -0.54 | 0.71  | -0.11 | 0.35  |
| BE139960 | Cadherin 1; Epithelial cadherin                                          | 0.55  | 2.07  | 2.19  | 1.81  | -0.56 | 1.91  | 0.28  | 1.55  |
| BE139927 | Cadherin 1; Epithelial cadherin                                          | 0.26  | 0.89  | 1.70  | 0.84  | -0.89 | 2.12  | 0.74  | 1.41  |
| BE139858 | Cadherin 1; Epithelial cadherin                                          | 0.20  | 1.59  | 1.85  | 1.65  | -0.07 | 1.49  | -0.21 | 1.42  |
| BE139815 | Cadherin 1; Epithelial cadherin                                          | 0.51  | 1.96  | 1.83  | 1.51  | -0.63 | 1.69  | 0.53  | 0.99  |
| BE139806 | Cadherin 1; Epithelial cadherin                                          | 0.56  | 1.86  | 2.41  | 1.80  | -0.59 | 2.31  | -0.02 | 1.58  |
| BE139792 | Cadherin 1; Epithelial cadherin                                          | 0.22  | 1.54  | 1.82  | 1.49  | -1.02 | 1.50  | 0.19  | 1.34  |
| BE139769 | Cadherin 1; Epithelial cadherin                                          | 0.39  | 1.69  | 1.98  | 1.48  | -1.05 | 1.79  | 0.38  | 1.44  |
| BE139768 | Cadherin 1; Epithelial cadherin                                          | 0.37  | 1.57  | 1.77  | 1.55  | -1.42 | 1.73  | 0.63  | 1.25  |
| BE139752 | Cadherin 1; Epithelial cadherin                                          | 0.45  | 1.83  | 1.76  | 1.80  | -1.25 | 1.79  | 1.14  | 1.44  |
| BE139736 | Cadherin 1; Epithelial cadherin                                          | 0.36  | 1.80  | 2.13  | 1.68  | -0.49 | 2.11  | 0.09  | 1.43  |
| AW773277 | Cadherin 1; Epithelial cadherin                                          | 0.38  | 1.70  | 2.08  | 1.64  | -0.40 | 2.12  | 0.25  | 1.41  |
| AW773129 | Cadherin 1; Epithelial cadherin                                          | 0.20  | 0.68  | 1.42  | 0.48  | -1.20 | 1.68  | 0.03  | 1.10  |
| BU401642 | Aggrecan core protein                                                    | 1.01  | 0.86  | 0.64  | -0.68 | -2.34 | 2.18  | -0.02 | 1.36  |
| BU427718 | Aggrecan core protein                                                    | 1.25  | 1.09  | -0.60 | -0.58 | -1.94 | 1.06  | 0.91  | 1.23  |
| BU130635 | vascular cell adhesion molecule 1                                        | 5.03  | 2.18  | 2.34  | 0.63  | 0.53  | 0.45  | -0.09 | 0.21  |
| BU361094 | programmed cell death 1 ligand 1                                         | 2.76  | 1.28  | 2.14  | -0.12 | -0.43 | 0.02  | -0.17 | -0.44 |
| BU490981 | platelet/endothelial cell adhesion molecule                              | 1.06  | 1.46  | 1.91  | 0.50  | -1.50 | 1.46  | 1.15  | 1.48  |
| BU295025 | integrin beta 2                                                          | 1.19  | 1.75  | 1.31  | 0.57  | -1.50 | -0.41 | -0.56 | 0.23  |
| BU296938 | cadherin 2, type 1, N-cadherin                                           | -0.46 | -1.36 | -0.76 | -0.78 | 1.14  | -0.81 | -0.69 | -0.67 |
| BU201861 | cadherin 15, M-cadherin                                                  | -1.24 | -1.19 | -1.49 | -1.07 | 0.15  | -0.52 | -0.27 | -0.43 |
| BU128418 | extracellular matrix protein periostin-bm                                | 1.36  | 0.83  | 1.98  | -0.45 | -1.04 | 3.15  | 0.43  | 0.37  |
| BU244746 | type XIII collagen                                                       | 0.16  | -0.63 | -1.67 | -1.23 | -0.21 | -1.02 | -0.93 | -0.72 |
| BU320552 | type V collagen                                                          | -0.50 | -0.86 | -1.76 | -1.34 | -1.36 | -0.83 | -0.53 | -0.52 |
| BU483469 | Syndecan-1 (SYND1) (CD138)                                               | 2.15  | 1.19  | 2.07  | 0.13  | -0.55 | 1.78  | 0.14  | 0.39  |
| BU307831 | Hyaluronan synthase 2(Hyaluronate synthase 2)                            | 3.34  | 2.10  | -0.19 | -2.46 | -1.08 | -0.73 | -1.60 | -1.31 |
| BU489133 | Collagen alpha 1(III) chain                                              | 0.64  | 0.27  | -0.17 | -1.61 | -4.96 | 0.34  | -0.72 | 0.48  |
| BU334707 | thrombospondin                                                           | -0.25 | -0.69 | -1.72 | -1.27 | 0.46  | -0.77 | -0.48 | -0.86 |
| BU375616 | laminin, gamma 1                                                         | -0.42 | -0.36 | -1.08 | -1.16 | -1.80 | -0.36 | -0.51 | -0.48 |
| BU483367 | laminin, alpha 3                                                         | 0.73  | 1.02  | 2.33  | 0.52  | 0.02  | 2.58  | 0.24  | 0.34  |
| AI982287 | Lamin B receptor                                                         | 0.67  | 0.98  | 1.10  | 1.30  | 1.01  | 0.37  | 0.38  | 0.68  |
| BU204014 | integrin beta 5                                                          | -0.01 | 0.12  | -1.00 | -0.57 | -1.19 | -1.23 | -0.71 | -0.73 |
| BG625071 | collagen, type IV, alpha                                                 | -0.15 | -0.31 | -1.05 | -1.20 | -0.95 | -1.07 | -0.34 | -0.57 |
| BU420326 | collagen, type I/II/III/V/XI, alpha                                      | 0.19  | 0.09  | -1.34 | -1.42 | -1.61 | 0.39  | 0.44  | -0.04 |
| BU301033 | collagen type VI subunit alpha-1                                         | -0.43 | -0.51 | -1.58 | -1.12 | -0.86 | -1.19 | -0.95 | -0.92 |
| BU412310 | chondroadherin                                                           | 1.14  | 0.11  | -0.82 | -1.22 | -2.00 | 0.85  | 0.58  | 0.39  |
| BU388056 | CD47 antigen (Rh-related antigen, integrin-associated signal transducer) | 2.16  | 1.03  | 1.82  | 0.52  | 0.13  | 1.85  | 0.64  | 0.35  |
| BU258105 | 47 kDa heat shock protein (Collagen-binding protein 1)                   | 0.93  | 1.21  | 1.39  | -0.19 | -1.37 | 1.43  | 0.53  | 0.94  |
| BU257424 | Cartilage matrix protein (Matrilin-1)                                    | 1.41  | 0.65  | -0.26 | -1.13 | -1.37 | 1.41  | 0.61  | 0.95  |

#### Cellular Processes

#### Cell Motility

#### Regulation of actin cytoskeleton

|          |                                                         |       |       |       |       |       |       |       |       |
|----------|---------------------------------------------------------|-------|-------|-------|-------|-------|-------|-------|-------|
| BU360509 | protein tyrosine phosphatase, receptor type, B          | -1.22 | 0.07  | -1.40 | 0.68  | -0.81 | 0.02  | -0.01 | 0.59  |
| BU411797 | Myosin-binding protein C, slow-type (Slow MyBP-C)       | -0.45 | -1.02 | -1.08 | -3.29 | -0.90 | -0.37 | -0.09 | 0.16  |
| AI982129 | Myosin IXb                                              | -0.06 | -1.13 | -2.28 | -1.62 | -2.43 | -0.11 | -0.16 | -0.33 |
| BE139976 | anillin, actin binding protein                          | 0.20  | 1.88  | 2.17  | 1.04  | -0.02 | 0.78  | 0.30  | 0.54  |
| AW773245 | anillin, actin binding protein                          | 0.44  | 2.99  | 2.30  | 1.29  | 0.19  | 0.52  | 0.24  | 0.58  |
| AW773095 | anillin, actin binding protein                          | 0.31  | 2.48  | 2.03  | 1.02  | -0.08 | 0.84  | 0.47  | 0.65  |
| BU375923 | T-cell lymphoma invasion and metastasis                 | -0.93 | -1.49 | -2.62 | -1.70 | -0.19 | -0.80 | -0.58 | -0.57 |
| AI982060 | radixin                                                 | -0.75 | -0.89 | -2.81 | -0.11 | -1.99 | -0.80 | -0.94 | -0.27 |
| BU426359 | Rac/Cdc42 guanine nucleotide exchange factor 6          | 0.68  | 1.16  | 1.27  | 0.35  | -1.51 | 0.52  | -0.12 | 0.72  |
| BU337448 | profilin                                                | -1.79 | -2.10 | -3.19 | 0.63  | 0.30  | -0.66 | 0.13  | -0.17 |
| BU250639 | Myosin heavy chain                                      | -0.38 | -0.35 | -0.77 | -2.44 | -1.29 | 0.06  | 0.05  | 0.97  |
| BU144510 | Myoglobin                                               | -1.19 | -1.72 | -0.66 | -3.39 | -0.05 | -0.85 | 0.83  | -0.06 |
| BU315169 | leucine-rich protein (LRP 130) (GP130)                  | 0.35  | 0.22  | 2.63  | 0.24  | -0.05 | 2.60  | 0.26  | 0.34  |
| BU222494 | gelsolin                                                | 0.47  | 1.15  | 2.37  | 1.02  | -1.44 | 3.40  | -0.06 | 1.20  |
| BG625613 | Coronin 1C (Coronin 3)                                  | 1.49  | 1.27  | 1.36  | 1.04  | -1.17 | 0.43  | 0.30  | 0.80  |
| BU297337 | Coronin 1C (Coronin 3)                                  | 1.08  | 1.24  | 1.52  | 0.30  | -2.44 | 0.19  | -0.20 | 0.88  |
| AJ447332 | Coronin 1C (Coronin 3)                                  | 0.64  | -0.03 | 0.69  | 0.41  | 1.47  | 1.53  | -0.18 | 0.04  |
| BF723724 | anillin, actin binding protein                          | -0.27 | 1.98  | 1.81  | 0.86  | -0.45 | 0.58  | 0.19  | 0.52  |
| BG625556 | Actin-like protein 2 (Actin-like protein ACTL)          | 1.10  | 1.08  | 1.33  | 0.51  | 0.11  | 0.58  | -0.04 | 0.09  |
| BU222255 | actinin, alpha                                          | 0.16  | 0.45  | 1.78  | -0.09 | -0.18 | 1.59  | -0.04 | 0.38  |
| AJ451588 | actinin, alpha                                          | 1.33  | 1.12  | 0.74  | 0.16  | 0.41  | -0.79 | -0.54 | -0.22 |
| BG624978 | Actin, cytoplasmic 2 (Gamma-actin)                      | -0.43 | -0.38 | -0.74 | -0.76 | -1.15 | -1.01 | -0.66 | -0.79 |
| BF723700 | actin related protein 3                                 | 1.87  | 1.34  | 2.51  | 0.30  | -1.91 | 1.77  | 0.29  | 1.10  |
| BU380027 | actin related protein 2/3 complex, subunit 1A/1B, 41kDa | 1.70  | 1.47  | 1.05  | 0.91  | -0.99 | 0.09  | 0.10  | 0.61  |

## Cell Growth and Death

### Cell cycle

|          |                                                                         |       |       |       |       |       |       |       |       |
|----------|-------------------------------------------------------------------------|-------|-------|-------|-------|-------|-------|-------|-------|
| BU428137 | spindle checkpoint protein BubR1                                        | -0.87 | 1.04  | 0.78  | 1.15  | 1.19  | -0.68 | -0.57 | -0.58 |
| BU411683 | SMC6 protein                                                            | 1.28  | 1.29  | 1.25  | 0.75  | 0.04  | 0.44  | 0.15  | -0.08 |
| AJ451887 | Septin 5 (Cell division control related protein 1)                      | -0.10 | 2.49  | 2.17  | 1.78  | 0.28  | 0.45  | 0.22  | 0.47  |
| BU127270 | Septin 2 (NEDD5 protein)                                                | 0.57  | 0.90  | 3.30  | 0.39  | -0.43 | 1.85  | 0.20  | 0.44  |
| BF723977 | cyclin F                                                                | -1.36 | -0.79 | 0.97  | 1.04  | -3.37 | 0.12  | 0.42  | 0.22  |
| BG625682 | cell proliferation antigen Ki-67                                        | -0.02 | 1.38  | 1.43  | 1.06  | -1.15 | -0.11 | -0.10 | 0.06  |
| BU455470 | CDC42-binding protein kinase beta                                       | -0.28 | -0.20 | 1.09  | -0.19 | -0.21 | 2.15  | -0.12 | 0.05  |
| BU382263 | CDC42-binding protein kinase beta                                       | 0.52  | 0.75  | 0.74  | 0.21  | -1.92 | 1.78  | 0.44  | 0.90  |
| BU344384 | tyrosine 3-monooxygenase/tryptophan 5-monooxygenase activation protein  | 0.61  | 0.83  | 1.16  | 0.52  | -2.66 | 0.99  | 0.42  | 0.81  |
| BG625440 | structural maintenance of chromosome 2                                  | 0.48  | 2.82  | 3.01  | 1.26  | 0.13  | 0.27  | 0.09  | 0.47  |
| BU109035 | S-phase kinase-associated protein 2                                     | 0.75  | 1.25  | 1.19  | 1.26  | -0.56 | 0.49  | 0.53  | 0.64  |
| BU356230 | Septin 6                                                                | 0.85  | 1.45  | 1.36  | 0.62  | -1.76 | 1.17  | 0.23  | 0.70  |
| BU402091 | SCF complex F-box protein MET30                                         | 0.04  | -0.37 | 1.13  | -0.45 | -1.01 | 0.69  | -0.20 | -0.37 |
| BF845714 | proliferating cell nuclear antigen                                      | 0.09  | 1.44  | 1.38  | 0.61  | 0.04  | 0.16  | 0.17  | -0.12 |
| BE139827 | proliferating cell nuclear antigen                                      | -0.21 | 1.15  | 1.02  | 0.30  | -0.09 | 0.01  | -0.02 | -0.13 |
| AI980702 | proliferating cell nuclear antigen                                      | 0.27  | 1.37  | 1.36  | 0.76  | 0.55  | 0.25  | 0.31  | 0.04  |
| BU464198 | polo-like kinase 1                                                      | -1.10 | 1.05  | 0.84  | 0.38  | -0.34 | -0.67 | -0.54 | -0.24 |
| BU213740 | polo-like kinase 1                                                      | -0.34 | 1.78  | 1.66  | 1.54  | -0.94 | 0.04  | -0.02 | 0.32  |
| BF723716 | polo-like kinase 1                                                      | -0.51 | 1.58  | 1.24  | 0.94  | 0.39  | -0.26 | -0.32 | -0.15 |
| BU246664 | peroxisomal biogenesis factor 6                                         | -0.69 | -0.45 | -1.26 | 0.33  | -1.16 | -0.42 | 0.38  | 0.04  |
| BU306537 | peroxisomal biogenesis factor 2                                         | -0.67 | -0.38 | 0.96  | -0.15 | -1.60 | 1.19  | -0.73 | -0.34 |
| BU275177 | mitotic checkpoint serine/threonine-protein kinase BUB1 beta            | 1.04  | 1.26  | 1.02  | 1.23  | 0.98  | 0.33  | 0.71  | 0.89  |
| BU110750 | minichromosome maintenance protein 6                                    | 0.26  | 1.09  | 1.53  | -0.06 | -0.65 | 0.30  | -0.17 | -0.06 |
| BU324833 | minichromosome maintenance protein 4 (cell division control protein 54) | 0.14  | 1.14  | 1.09  | -0.08 | -0.56 | -0.32 | -0.32 | -0.37 |
| BF723984 | minichromosome maintenance protein 4 (cell division control protein 54) | 0.60  | 1.17  | 1.44  | 0.06  | -0.66 | 0.27  | -0.02 | -0.12 |
| BG625621 | minichromosome maintenance protein 3                                    | 0.32  | 1.39  | 1.33  | 0.62  | -0.41 | 0.25  | -0.05 | 0.30  |
| BU250559 | kinetochore protein-like                                                | -1.43 | -1.42 | -1.53 | -1.37 | -0.22 | -0.84 | -0.55 | -0.46 |
| BU301470 | kinesin-like protein KIF1B                                              | 0.21  | 1.03  | 1.11  | 0.11  | -0.66 | 1.13  | 0.12  | -0.07 |
| BU336711 | kinesin-like 6 (mitotic centromere-associated kinesin)                  | 0.33  | 2.23  | 1.76  | 1.08  | -0.31 | 0.37  | 0.39  | 0.64  |
| BU274620 | kinesin-associated protein 3                                            | -1.47 | -0.92 | -2.28 | -0.48 | 0.04  | 0.29  | 0.43  | 0.16  |
| BU291105 | Keratin, type II cytoskeletal 8 (Cytokeratin 8)                         | -0.13 | 1.21  | 0.59  | 0.61  | -2.42 | 0.38  | -0.18 | 0.87  |
| BU412444 | Keratin, type I cytoskeletal 19 (Cytokeratin 19)                        | -1.16 | -1.21 | -2.01 | -0.90 | -0.23 | -0.51 | -0.19 | -0.43 |
| BU271323 | kendrin                                                                 | 0.21  | 0.33  | 1.01  | 0.33  | -0.18 | 1.23  | 0.09  | 0.00  |

|                                  |                                                                                       |       |       |       |       |       |       |       |       |  |
|----------------------------------|---------------------------------------------------------------------------------------|-------|-------|-------|-------|-------|-------|-------|-------|--|
| BU311059                         | growth arrest and DNA-damage-inducible                                                | 1.43  | -0.58 | -0.78 | -0.86 | -1.09 | -0.29 | -0.24 | 0.28  |  |
| BU453388                         | Cyclin C                                                                              | 0.23  | 0.60  | 1.01  | 0.03  | -1.12 | 0.87  | 0.27  | 0.43  |  |
| BU113105                         | cyclin B                                                                              | -0.42 | 1.68  | 1.33  | 1.37  | -0.03 | -0.36 | -0.26 | 0.07  |  |
| AJ397334                         | cyclin B                                                                              | -0.01 | 1.68  | 1.51  | 0.96  | 2.02  | 0.11  | -0.12 | 0.01  |  |
| BU465755                         | condensin complex subunit 3                                                           | 0.40  | 1.62  | 2.26  | 0.67  | -0.61 | 0.83  | 0.05  | 0.46  |  |
| BU389347                         | condensin complex subunit 3                                                           | -0.03 | 1.58  | 1.45  | 1.28  | 1.35  | -0.01 | 0.11  | 0.04  |  |
| AJ455290                         | Clk3 protein                                                                          | -0.29 | -1.48 | -1.52 | -1.14 | 1.14  | -0.58 | -0.91 | -1.26 |  |
| BU454373                         | cell division cycle 25B                                                               | -0.15 | 1.33  | 0.29  | 0.57  | -1.20 | 0.12  | -0.54 | 0.61  |  |
| BU245578                         | checkpoint serine/threonine-protein kinase                                            | -0.37 | 1.30  | 1.56  | 0.79  | -0.67 | 0.33  | 0.01  | 0.14  |  |
| <b>Apoptosis</b>                 |                                                                                       |       |       |       |       |       |       |       |       |  |
| BU486338                         | survivin                                                                              | -0.38 | 2.21  | 1.75  | 1.33  | 1.11  | 0.01  | 0.01  | 0.08  |  |
| BU241925                         | Caspase recruitment domain protein 9 (rCARD9)                                         | 1.61  | 1.86  | 1.28  | 0.46  | -0.64 | -0.12 | -0.18 | -0.01 |  |
| BU288166                         | CARD-containing MAGUK protein CARMA1                                                  | 0.48  | 1.06  | 1.24  | 0.29  | 1.54  | -0.31 | -0.46 | 0.05  |  |
| BU459549                         | Tumor suppressor p53-binding protein 1                                                | -1.01 | -0.69 | -1.04 | -0.18 | 0.82  | -0.49 | -0.12 | -0.46 |  |
| BU410189                         | tumor necrosis factor receptor superfamily, member 11B                                | 2.02  | 0.66  | 0.72  | -0.96 | -1.23 | 0.78  | 0.12  | 0.37  |  |
| BU223326                         | TNFRSF receptor-interacting serine/threonine-protein kinase 1                         | 0.76  | 0.40  | 1.86  | -0.02 | -0.73 | 1.38  | -0.41 | -0.14 |  |
| BU369352                         | p53-related protein                                                                   | 1.02  | 0.53  | 1.62  | 0.45  | -0.89 | 0.97  | 0.65  | 0.67  |  |
| BU399078                         | IAP repeat-containing protein 6 (Ubiquitin-conjugating BIR-domain enzyme apollon)     | 0.04  | 0.22  | 1.23  | 0.23  | 0.71  | 1.28  | 0.21  | 0.32  |  |
| AI980572                         | IAP homolog                                                                           | 2.04  | 1.20  | 1.22  | 0.23  | 0.42  | 0.14  | 0.25  | -0.15 |  |
| BU121710                         | caspase-6                                                                             | 1.44  | 1.38  | 0.57  | 0.41  | 0.23  | -0.02 | 0.11  | -0.08 |  |
| AI980887                         | caspase-3                                                                             | 1.56  | 0.31  | 1.08  | 0.34  | -0.48 | 0.03  | -0.12 | -0.05 |  |
| BU318447                         | CASP gene product                                                                     | 0.38  | 0.20  | 1.52  | 0.41  | -0.40 | 1.26  | 0.14  | 0.43  |  |
| BU133614                         | BH3 interacting domain death agonist                                                  | 0.47  | 0.78  | 1.16  | 0.45  | -1.07 | -0.20 | -0.38 | -0.14 |  |
| BU385372                         | baculoviral IAP repeat-containing 2/3/4                                               | 1.35  | 0.13  | -0.36 | -1.08 | -0.21 | 0.70  | 0.26  | -0.12 |  |
| BU291823                         | BCL7A protein                                                                         | -0.65 | -1.04 | -0.99 | 0.49  | 0.81  | 1.05  | 0.76  | 0.37  |  |
| BU390170                         | Bcl-2-associated transcription factor                                                 | 0.84  | 0.51  | 1.65  | -0.10 | -0.99 | 1.67  | -0.12 | 0.24  |  |
| <b>Cell Communication</b>        |                                                                                       |       |       |       |       |       |       |       |       |  |
| <b>Tight/Gap junction</b>        |                                                                                       |       |       |       |       |       |       |       |       |  |
| BQ293321                         | tubulin, beta                                                                         | -0.77 | -0.62 | -1.23 | 0.45  | -1.19 | -0.10 | -0.07 | 0.15  |  |
| BE140004                         | tubulin, beta                                                                         | -0.97 | -1.11 | -1.61 | 0.23  | -1.44 | -0.13 | -0.03 | 0.11  |  |
| BU334987                         | Tubulin tyrosine ligase-like protein 1                                                | -0.53 | -1.04 | -1.02 | 0.42  | 0.89  | 0.02  | 0.22  | -0.08 |  |
| BU380226                         | Gap junction alpha-7 protein (Connexin 45)                                            | -0.63 | -0.86 | -1.12 | -1.27 | -0.17 | -1.14 | -0.82 | -0.56 |  |
| AI979744                         | parvin                                                                                | 1.59  | 0.72  | 1.29  | 0.45  | 0.62  | -0.14 | -0.15 | -0.06 |  |
| BU234967                         | filamin                                                                               | -1.09 | -1.13 | -2.09 | -0.10 | 0.56  | -0.33 | 0.05  | -0.46 |  |
| BU119964                         | guanine nucleotide binding protein (G protein), alpha inhibiting activity polypeptide | 1.16  | 1.24  | 1.32  | 0.97  | -0.66 | 0.32  | 0.38  | 0.58  |  |
| BU226294                         | tight junction protein 3                                                              | -1.32 | -0.82 | -1.62 | 0.07  | -1.36 | -0.56 | 0.34  | 0.15  |  |
| BU142697                         | tight junction protein 1                                                              | 0.61  | 0.30  | 1.36  | 0.33  | -0.12 | 1.72  | 0.11  | 0.48  |  |
| BU446642                         | novel protein kinase C [EC:2.7.11.13]                                                 | 0.88  | 0.60  | 1.29  | -0.34 | -1.88 | 1.28  | -0.01 | 0.41  |  |
| BU111802                         | guanine nucleotide binding protein (G protein), alpha inhibiting activity polypeptide | 1.10  | 1.36  | 0.82  | 0.47  | -2.91 | 0.76  | 0.40  | 1.08  |  |
| BU374135                         | Exocyst complex component Sec15A                                                      | 0.62  | 0.71  | 1.78  | 0.47  | -0.13 | 1.68  | 0.27  | 0.32  |  |
| BF723898                         | Exocyst complex component Sec15A                                                      | 0.04  | 0.35  | 1.22  | 0.28  | -0.39 | 1.05  | -0.64 | -0.22 |  |
| BU303983                         | exocyst complex component 3                                                           | 0.71  | 1.30  | 1.27  | 0.46  | -0.44 | 0.73  | 0.02  | 0.53  |  |
| <b>Endocrine System</b>          |                                                                                       |       |       |       |       |       |       |       |       |  |
| <b>Insulin signaling pathway</b> |                                                                                       |       |       |       |       |       |       |       |       |  |
| BU434478                         | MAS1 oncogene                                                                         | 3.80  | 1.71  | 0.86  | -0.13 | 0.19  | 0.00  | 0.00  | 0.07  |  |
| BU492719                         | stearoyl-CoA desaturase                                                               | 0.47  | 0.88  | 1.36  | 0.29  | -1.51 | 1.11  | 0.36  | 0.64  |  |
| AI980131                         | TIS                                                                                   | 0.07  | 1.00  | 0.91  | 0.69  | -2.26 | 0.76  | -0.18 | 0.91  |  |
| BU106374                         | TIS                                                                                   | 2.45  | 0.94  | 1.73  | 1.58  | 1.17  | 1.31  | 1.50  | 0.86  |  |
| BU262975                         | Pre-mRNA splicing factor SRP40(Insulin-induced growth response protein CL-4)          | 0.49  | 1.19  | 1.39  | 0.00  | -1.17 | 1.51  | -0.06 | 0.61  |  |
| BU448941                         | Pre-mRNA splicing factor SRP40 (Insulin-induced growth response protein CL-4)         | 0.28  | 0.61  | 0.96  | -0.06 | -1.99 | 1.13  | -0.41 | 0.35  |  |
| BU287621                         | protein phosphatase 1, catalytic subunit                                              | 0.14  | 0.67  | 1.61  | 0.07  | -1.40 | 1.68  | 0.16  | 0.22  |  |
| AJ456236                         | protein phosphatase 1, catalytic subunit                                              | -0.20 | 1.72  | 2.06  | 1.27  | 0.77  | 0.17  | -0.04 | 0.06  |  |
| BU409545                         | insulin-like growth factor 1 receptor                                                 | -0.56 | -0.10 | -1.02 | -0.26 | -1.90 | -0.68 | -0.09 | -0.10 |  |
| BU473774                         | insulin receptor tyrosine kinase substrate                                            | 0.71  | 0.44  | 0.51  | -0.32 | -1.69 | 2.02  | 0.45  | 0.76  |  |
| BU269329                         | insulin induced protein 2                                                             | 1.80  | 0.39  | 1.30  | 0.26  | 1.36  | 1.05  | -0.07 | 0.01  |  |
| BU107910                         | FKBP12-rapamycin complex-associated protein                                           | -0.88 | -0.32 | -1.24 | -0.98 | -0.63 | -1.00 | -0.56 | -0.38 |  |
| BG625568                         | avian thymic hormone                                                                  | -1.44 | -1.22 | -0.63 | -2.00 | -0.15 | -1.56 | -0.97 | -0.31 |  |

## Immune System

### Hematopoietic cell lineage

|          |                      |       |       |       |       |       |       |       |       |
|----------|----------------------|-------|-------|-------|-------|-------|-------|-------|-------|
| BU357815 | transferrin receptor | 0.56  | 0.77  | 1.42  | -0.30 | -1.07 | 0.79  | -0.32 | 0.27  |
| BU277433 | nesprin-1 alpha      | 0.26  | 0.06  | 1.06  | -0.15 | -1.09 | 1.33  | -0.04 | 0.85  |
| BU372940 | neprilysin           | -0.23 | -1.46 | -1.32 | -1.22 | -0.87 | -0.57 | -0.94 | -0.41 |
| BU358602 | CD9 antigen          | -1.23 | -2.01 | -2.57 | -1.57 | 0.07  | -0.82 | -0.70 | -0.50 |
| BU381076 | CD34 antigen         | -1.20 | -1.18 | -1.53 | -0.91 | -1.07 | -0.68 | -0.32 | -0.16 |

### Complement and coagulation cascades

|          |                                                          |       |       |       |       |       |       |       |       |
|----------|----------------------------------------------------------|-------|-------|-------|-------|-------|-------|-------|-------|
| BU405865 | complement regulatory membrane protein                   | 0.73  | 0.85  | 0.38  | 0.05  | -1.52 | 1.63  | 0.66  | 1.08  |
| BU412107 | urokinase plasminogen activator (uPA)                    | 1.54  | 1.77  | 0.13  | -0.12 | -0.43 | 0.14  | -1.10 | -0.99 |
| AI981748 | complement factor H                                      | -1.06 | -0.84 | -1.02 | -0.36 | -0.16 | -0.09 | 0.07  | -0.21 |
| BU375371 | complement component 4                                   | 0.40  | 1.02  | 0.82  | 1.57  | -0.89 | -0.45 | 0.28  | 0.56  |
| BU344075 | complement component 1, s subcomponent                   | 3.11  | 2.65  | 3.08  | 0.86  | -0.31 | 1.25  | 0.70  | 0.99  |
| BU247397 | complement component 1, q subcomponent, beta polypeptide | 1.59  | 1.31  | 1.29  | 0.66  | -0.43 | -0.47 | -0.24 | -0.35 |
| BU465902 | bradykinin receptor B1                                   | 1.25  | 0.89  | -0.29 | -1.23 | 0.41  | -1.05 | -1.11 | -1.00 |
| BU476741 | anaphylatoxin C3a receptor                               | 2.25  | 2.47  | 2.05  | 1.06  | 1.23  | 0.02  | 0.05  | 0.18  |

### Toll-like receptor signaling pathway

|          |                                            |      |      |      |      |       |       |       |       |
|----------|--------------------------------------------|------|------|------|------|-------|-------|-------|-------|
| BU374739 | Toll-like receptor 2 type 1                | 2.00 | 2.10 | 1.79 | 0.07 | -1.02 | 1.07  | -0.33 | -0.17 |
| BU234701 | ARHGAP15                                   | 1.28 | 1.49 | 2.28 | 0.98 | 1.26  | 0.22  | -0.02 | 0.40  |
| BU435893 | toll-like receptor 7                       | 1.94 | 2.35 | 1.60 | 0.56 | 0.95  | -0.20 | -0.55 | 0.00  |
| BU200466 | toll-like receptor 2, type 1               | 1.54 | 2.06 | 0.61 | 0.02 | 0.47  | -0.60 | -0.74 | -0.75 |
| BG625445 | Ras-related C3 botulinum toxin substrate 1 | 1.84 | 1.71 | 2.15 | 1.82 | 0.51  | 0.61  | 0.69  | 1.22  |
| AI980647 | Ras-related C3 botulinum toxin substrate 1 | 1.05 | 0.90 | 1.44 | 1.03 | 0.10  | 0.01  | -0.02 | 0.34  |

### Natural killer cell mediated cytotoxicity

|          |                                                                    |      |      |      |      |       |      |      |      |
|----------|--------------------------------------------------------------------|------|------|------|------|-------|------|------|------|
| BU299622 | Granzyme K (NK-tryptase-2)                                         | 1.02 | 0.70 | 2.09 | 2.28 | 1.23  | 0.46 | 0.56 | 0.92 |
| BU304038 | SH3-domain binding protein 2                                       | 1.20 | 0.96 | 1.53 | 0.60 | 0.06  | 1.19 | 0.23 | 0.30 |
| BG625224 | SH2 domain protein 1A                                              | 1.15 | 1.95 | 2.73 | 1.27 | 1.46  | 0.13 | 0.10 | 0.44 |
| BU212557 | fas ligand receptor soluble form                                   | 1.25 | 0.25 | 1.18 | 0.44 | 0.04  | 0.32 | 0.17 | 0.12 |
| AI981685 | Fas antigen/ tumor necrosis factor receptor superfamily, member 14 | 2.17 | 0.44 | 1.07 | 0.48 | 0.33  | 0.09 | 0.25 | 0.17 |
| BU300974 | Fas / tumor necrosis factor receptor superfamily, member 6         | 1.79 | 0.25 | 1.05 | 0.30 | -0.20 | 0.11 | 0.15 | 0.32 |

### Antigen processing and presentation

|          |                                                                        |       |       |       |       |       |      |       |       |
|----------|------------------------------------------------------------------------|-------|-------|-------|-------|-------|------|-------|-------|
| BU294829 | class II histocompatibility antigen M beta chain 1                     | 1.61  | 1.39  | 1.01  | 0.86  | -0.61 | 0.20 | 0.02  | 0.08  |
| AI981465 | CD83 antigen                                                           | 2.13  | 0.88  | 1.01  | 0.65  | 0.22  | 0.57 | 0.55  | 0.32  |
| BU133108 | Bactericidal permeability-increasing protein (BPI)                     | 4.69  | 2.01  | 2.29  | 0.46  | 0.58  | 0.29 | -0.34 | 0.09  |
| BG625012 | major histocompatibility complex, class II, beta chain; B-L beta chain | 1.26  | 1.78  | 1.03  | 1.17  | -1.33 | 0.28 | 0.31  | 0.73  |
| BM293829 | heat shock 70kDa protein 1/8                                           | 0.99  | 1.04  | 1.07  | 0.21  | -1.04 | 0.35 | 0.34  | 0.71  |
| BU126014 | cathepsin S [EC:3.4.22.27]                                             | 1.06  | 1.11  | 0.82  | 0.55  | -0.59 | 0.07 | 0.12  | -0.13 |
| AI980743 | cathepsin S                                                            | 1.12  | 1.27  | 1.01  | 0.61  | -0.70 | 0.22 | 0.27  | 0.12  |
| BU251021 | cAMP response element-binding protein 1                                | 2.68  | 1.00  | 0.96  | -0.63 | -1.28 | 0.42 | 0.14  | 0.24  |
| BU460997 | calpain                                                                | -1.04 | -0.71 | -1.92 | -0.14 | 0.05  | 0.15 | 0.31  | -0.28 |
| BU399365 | calnexin                                                               | 0.40  | 0.48  | 1.40  | 0.49  | -0.06 | 1.49 | 0.39  | 0.75  |
| BE139971 | DC22                                                                   | 1.69  | 1.47  | 1.25  | 0.72  | -1.18 | 0.29 | 0.45  | 0.46  |

### T cell receptor signaling pathway

|          |                                                       |       |       |       |       |       |       |       |       |
|----------|-------------------------------------------------------|-------|-------|-------|-------|-------|-------|-------|-------|
| AI981235 | T-cell receptor beta chain                            | 0.86  | 1.04  | 1.97  | 1.31  | 1.71  | 0.32  | 0.32  | 0.54  |
| BU140547 | MTCP-1 protein (Mature T-cell proliferation-1 type A) | -1.89 | -0.93 | -1.44 | -0.50 | -1.46 | -0.65 | -0.55 | -0.52 |
| BG625718 | GRB2-related adaptor protein 2 (GRAP)                 | 0.77  | 0.94  | 1.70  | 1.34  | 1.16  | -0.14 | 0.05  | 0.72  |
| AI980480 | Grb2-associated binder 1                              | 1.02  | 0.82  | 0.68  | 0.03  | 1.07  | -0.18 | -0.19 | -0.26 |
| AI980859 | zeta-chain (TCR) associated protein kinase / ZAP-70   | 1.27  | 1.31  | 2.03  | 1.14  | 0.41  | -0.10 | 0.12  | 0.52  |
| BG625641 | TCR zeta chain subunit                                | 0.46  | 1.16  | 1.79  | 0.91  | 0.45  | -0.51 | -0.23 | 0.15  |
| BG625390 | TCR zeta chain subunit                                | 1.33  | 1.93  | 2.11  | 1.58  | 1.43  | -0.21 | 0.42  | 0.87  |
| BU254912 | T-complex protein 1, beta subunit (TCP-1-beta)        | 0.79  | 0.87  | 1.66  | 0.49  | -1.19 | 1.26  | 0.55  | 0.61  |
| AI980159 | T-cell surface glycoprotein CD8 alpha chain           | 0.06  | 0.56  | 1.19  | 1.65  | 0.25  | -0.40 | -0.14 | 0.31  |
| BG625372 | T-cell receptor beta                                  | 2.01  | 2.49  | 3.01  | 2.74  | 2.64  | 0.82  | 0.97  | 1.76  |
| BG625371 | T-cell receptor beta                                  | 1.21  | 1.76  | 2.78  | 2.19  | 1.99  | 0.31  | 0.28  | 1.18  |
| BG625741 | T cell receptor delta chain                           | 1.08  | 1.30  | 1.72  | 1.17  | 1.33  | 0.47  | 0.86  | 1.06  |
| BU207995 | T cell immunoglobulin mucin-3                         | 1.34  | 1.28  | 1.33  | 1.22  | 1.23  | -0.03 | -0.01 | 0.29  |
| BU211840 | Ras homolog gene family, member A                     | 0.67  | 0.48  | 1.05  | 0.18  | -2.33 | 1.00  | 0.59  | 0.90  |
| BU380565 | protein tyrosine phosphatase, non-receptor type 6     | 1.98  | 1.49  | 2.41  | 0.71  | -1.99 | 1.33  | 0.23  | 0.62  |
| BU117842 | lymphoid-restricted membrane protein Jaw1             | 0.40  | 0.42  | 1.49  | 0.61  | 1.54  | 0.12  | -0.06 | 0.47  |
| AI979962 | lymphocyte-specific protein 1                         | 1.01  | 1.10  | 1.06  | 0.65  | 0.32  | 0.15  | 0.25  | 0.28  |
| BU137526 | lymphocyte specific helicase                          | 0.42  | 1.40  | 1.39  | 0.77  | 0.33  | 0.24  | 0.23  | 0.31  |

|                                             |                                                                                           |       |       |       |       |       |       |       |       |  |
|---------------------------------------------|-------------------------------------------------------------------------------------------|-------|-------|-------|-------|-------|-------|-------|-------|--|
| AI982250                                    | Lymphocyte antigen Ly-6E (Stem cell antigen 2)                                            | 1.34  | -0.26 | -1.02 | -0.21 | 0.96  | 0.06  | 0.59  | -0.48 |  |
| BG625359                                    | L-plastin (Lymphocyte cytosolic protein 1)                                                | 3.51  | 3.28  | 3.24  | 1.87  | 0.73  | 0.85  | 0.87  | 1.13  |  |
| BU374370                                    | GRB2-related adaptor protein                                                              | 0.94  | 1.27  | 1.51  | 1.20  | -0.57 | 0.01  | -0.06 | 0.52  |  |
| AJ394199                                    | GRB2-related adaptor protein                                                              | -0.90 | -0.49 | -1.21 | 0.32  | 1.18  | -0.46 | 0.02  | -0.08 |  |
| BU245144                                    | CD80-like protein                                                                         | 1.41  | 0.48  | 1.47  | 0.00  | 0.12  | 1.97  | 0.43  | 0.84  |  |
| BU492201                                    | CD3G antigen, gamma polypeptide                                                           | 1.84  | 2.27  | 3.01  | 2.79  | 1.19  | 0.94  | 1.06  | 1.70  |  |
| BU301629                                    | CD3 epsilon                                                                               | 1.29  | 1.94  | 2.61  | 1.83  | 0.50  | 0.51  | 0.48  | 0.82  |  |
| AI980528                                    | CD3 epsilon                                                                               | 1.62  | 1.83  | 2.80  | 1.79  | 0.46  | 0.67  | 0.64  | 1.33  |  |
| BU308805                                    | t-complex protein Tcp-10                                                                  | -1.25 | -2.21 | -3.18 | -0.84 | -0.01 | 0.31  | 0.75  | 0.10  |  |
| BU325091                                    | T-complex protein 1(TCP-1-alpha)                                                          | 0.59  | 0.97  | 1.34  | 0.68  | -1.66 | 0.89  | 0.74  | 0.95  |  |
| <b>B cell receptor signaling pathway</b>    |                                                                                           |       |       |       |       |       |       |       |       |  |
| AW773313                                    | immunoglobulin J chain                                                                    | -1.49 | -1.03 | 1.31  | 0.97  | 0.51  | 0.33  | 0.35  | -0.09 |  |
| BU269181                                    | Immunoglobulin heavy chain binding protein(BIP). [Chicken] {Gallus gallus}, partial (15%) | 1.81  | 1.72  | 2.59  | 0.59  | -0.69 | 2.64  | 0.49  | 1.48  |  |
| BU123895                                    | Ig light chain precursor                                                                  | -1.03 | -0.76 | 0.79  | 1.09  | -3.18 | 0.18  | 0.79  | 0.18  |  |
| BE140052                                    | Ig light chain precursor                                                                  | -0.62 | -0.50 | 0.89  | 1.44  | -2.16 | 0.55  | 1.04  | 0.47  |  |
| BE139828                                    | Ig light chain precursor                                                                  | -0.83 | -0.41 | 0.56  | 1.04  | -2.23 | 0.36  | 0.70  | 0.39  |  |
| AW773272                                    | Ig light chain                                                                            | -0.55 | 0.03  | 0.89  | 1.26  | -3.63 | 0.21  | 0.66  | 0.72  |  |
| BF724010                                    | Ig light chain                                                                            | -0.73 | -0.41 | 0.95  | 1.01  | -3.11 | 0.37  | 0.76  | 0.90  |  |
| BF723955                                    | Ig light chain                                                                            | -0.71 | -0.51 | 1.00  | 0.95  | -2.62 | 0.24  | 0.53  | 0.07  |  |
| BF723860                                    | Ig light chain                                                                            | -0.83 | -0.44 | 0.93  | 1.07  | -3.48 | 0.43  | 0.91  | 0.57  |  |
| BF723844                                    | Ig light chain                                                                            | -0.65 | -0.24 | 1.13  | 1.14  | -3.22 | 0.57  | 0.96  | 0.59  |  |
| BF723832                                    | Ig light chain                                                                            | -0.71 | -0.28 | 1.07  | 1.04  | -3.18 | 0.43  | 0.71  | 0.63  |  |
| BF723702                                    | Ig light chain                                                                            | -0.79 | -0.28 | 0.98  | 1.03  | -3.29 | 0.27  | 0.69  | 0.53  |  |
| BE140022                                    | Ig light chain                                                                            | -0.80 | -0.32 | 0.86  | 1.19  | -3.40 | 0.29  | 0.73  | 0.54  |  |
| BE139905                                    | Ig light chain                                                                            | -0.71 | -0.21 | 1.02  | 1.05  | -3.54 | 0.27  | 0.70  | 0.58  |  |
| BE139882                                    | Ig light chain                                                                            | -0.86 | -0.43 | 0.82  | 1.03  | -3.32 | 0.52  | 0.83  | 0.51  |  |
| BE139847                                    | Ig light chain                                                                            | -0.87 | -0.40 | 0.97  | 1.15  | -3.51 | 0.43  | 0.85  | 0.71  |  |
| AW773187                                    | Ig light chain                                                                            | -0.95 | -0.65 | 0.83  | 1.11  | -3.44 | 0.29  | 0.90  | 0.60  |  |
| AW773146                                    | Ig light chain                                                                            | -0.69 | -0.44 | 0.87  | 1.12  | -2.96 | 0.53  | 1.03  | 0.88  |  |
| BU387082                                    | CD81 antigen                                                                              | 0.68  | 1.00  | 0.57  | 0.37  | -1.31 | 0.54  | -0.10 | 0.28  |  |
| AI981029                                    | B-G                                                                                       | -0.15 | -0.96 | -1.03 | -1.49 | -0.05 | -1.24 | -0.89 | -0.35 |  |
| BU471941                                    | BCAP                                                                                      | 2.84  | 1.50  | 2.13  | 0.36  | -1.04 | 0.67  | 0.40  | 0.41  |  |
| BQ293342                                    | immunoglobulin J chain                                                                    | -0.54 | -0.77 | 1.44  | 0.79  | -1.55 | 0.31  | 0.15  | 0.17  |  |
| BE139945                                    | immunoglobulin J chain                                                                    | -1.28 | -1.09 | 1.21  | 1.07  | 0.39  | 0.31  | 0.46  | -0.14 |  |
| BE139914                                    | immunoglobulin J chain                                                                    | -1.00 | -1.00 | 1.03  | 1.15  | 0.88  | 0.54  | 0.64  | -0.11 |  |
| BU324663                                    | I-mfa domain protein XIC                                                                  | 0.60  | -0.03 | 1.41  | -0.22 | -0.34 | 1.61  | -0.16 | -0.48 |  |
| AJ392749                                    | Ig V-region-like B-G antigen 14/8                                                         | 0.35  | -0.90 | -0.95 | -1.99 | -0.92 | -1.46 | -1.20 | -0.57 |  |
| BG625386                                    | Ig mu chain C region                                                                      | -1.11 | -0.63 | 0.95  | 0.79  | -3.08 | -0.22 | 0.52  | -0.52 |  |
| BF723939                                    | Ig light chain                                                                            | -0.87 | -0.58 | 0.93  | 1.21  | -3.50 | 0.12  | 0.65  | 0.56  |  |
| AW773265                                    | Ig light chain                                                                            | -0.81 | -0.30 | 0.94  | 1.23  | -2.83 | 0.40  | 0.80  | 0.60  |  |
| BF723857                                    | Ig light chain                                                                            | -0.77 | -0.29 | 1.01  | 1.10  | -3.39 | 0.34  | 0.93  | 0.72  |  |
| AW773279                                    | Ig light chain                                                                            | -1.20 | -0.86 | 1.04  | 1.19  | -2.59 | 0.29  | 0.62  | 0.27  |  |
| BG625356                                    | Ig gamma chain                                                                            | -1.07 | 0.23  | 2.35  | 2.73  | 0.02  | 2.35  | 2.31  | 2.96  |  |
| BU249956                                    | Enhancer of zeste homolog 2 (ENX-1)                                                       | 1.07  | 1.51  | 2.71  | 0.92  | -0.10 | 1.44  | 0.20  | 0.34  |  |
| BU481163                                    | chB1                                                                                      | 1.71  | 1.96  | 1.64  | 0.65  | -0.09 | -0.17 | -0.15 | 0.30  |  |
| BU387314                                    | B-G antigen                                                                               | -0.03 | -1.09 | -1.22 | -2.11 | -0.76 | -1.48 | -1.11 | -0.54 |  |
| BU113828                                    | B-cell CLL/lymphoma 10                                                                    | 0.76  | 0.34  | 1.90  | 0.20  | -0.62 | 1.42  | 0.23  | 0.00  |  |
| BU286022                                    | B(0,+)-type amino acid transporter 1 (B(0,+)-AT)                                          | -0.66 | -1.04 | -0.60 | -0.66 | 1.24  | -0.28 | -0.10 | -0.34 |  |
| BF845749                                    | B cell phosphoinositide 3-kinase adaptor                                                  | 0.46  | 1.46  | 2.33  | 1.36  | -1.43 | 2.67  | 0.07  | 1.58  |  |
| <b>Leukocyte transendothelial migration</b> |                                                                                           |       |       |       |       |       |       |       |       |  |
| BU294161                                    | Rho-associated, coiled-coil containing protein kinase                                     | 0.91  | 0.85  | 1.88  | 0.30  | -0.93 | 1.29  | 0.22  | 0.58  |  |
| BU397498                                    | neutrophil NADPh oxidase factor 1 (p47-phox)                                              | 0.78  | 1.61  | 0.81  | 1.29  | 1.78  | 0.00  | 0.16  | 0.49  |  |
| AJ394103                                    | neutrophil cytosol factor 2 (p47-phox)                                                    | 1.00  | 1.50  | 1.40  | 1.53  | 1.43  | 0.62  | 0.66  | 0.71  |  |
| BU470532                                    | Rho-associated, coiled-coil containing protein kinase                                     | 1.44  | 1.71  | 1.53  | 1.01  | -0.34 | 0.51  | 0.39  | 0.70  |  |
| BU419337                                    | neutrophil cytosolic factor 4                                                             | 2.06  | 1.52  | 0.93  | 0.23  | 0.68  | -0.42 | -0.59 | -0.23 |  |
| BU116697                                    | Leukocyte elastase inhibitor (Monocyte/neutrophil elastase inhibitor)                     | 2.57  | 1.02  | 0.45  | -0.43 | -0.59 | 0.22  | -0.26 | 0.29  |  |
| BU473336                                    | catenin (cadherin-associated protein), alpha                                              | -1.06 | -0.73 | -0.84 | -0.27 | 1.00  | -0.65 | -0.53 | -0.06 |  |
| <b>Development</b>                          |                                                                                           |       |       |       |       |       |       |       |       |  |
| BU423688                                    | ETS translocation variant 6/7                                                             | 2.03  | 0.57  | 0.45  | -0.15 | -2.33 | -0.06 | 0.12  | 0.67  |  |
| BU355212                                    | c-ets proto-oncogene protein                                                              | 0.76  | 1.11  | 1.98  | 0.70  | -1.45 | 1.00  | -0.36 | 0.92  |  |

|          |                                      |       |       |       |       |       |       |       |       |
|----------|--------------------------------------|-------|-------|-------|-------|-------|-------|-------|-------|
| BU377416 | semaphorin 4                         | -1.89 | -1.28 | -2.74 | -1.09 | 1.01  | -1.03 | -0.63 | -0.68 |
| BU208699 | semaphorin 3                         | 1.39  | -0.35 | 0.48  | -1.85 | -2.05 | 0.49  | -0.85 | -0.18 |
| BU255455 | roundabout, axon guidance receptor 2 | -0.48 | -0.39 | -1.55 | -1.17 | -0.02 | -0.45 | -0.29 | -0.48 |
| BU436922 | netrin 4                             | -0.20 | -0.62 | -1.45 | -1.06 | 0.25  | -0.79 | -0.25 | -0.32 |
| BU317776 | Eph receptor A3                      | -0.78 | 0.17  | -1.04 | -0.71 | -1.35 | -0.77 | -0.64 | -0.59 |
| Bu264606 | Eph receptor A1                      | -1.04 | -0.63 | -1.44 | -0.50 | 0.47  | -0.53 | -0.12 | -0.29 |

#### Human Diseases

|          |                                                                       |       |       |       |       |       |       |       |       |
|----------|-----------------------------------------------------------------------|-------|-------|-------|-------|-------|-------|-------|-------|
| BU243590 | serum amyloid A type A                                                | -0.28 | -0.71 | -1.32 | 0.60  | -1.02 | 0.42  | 0.61  | 0.33  |
| AI981649 | signal sequence receptor, delta (translocon-associated protein delta) | 0.11  | 1.07  | 0.41  | 1.31  | -2.18 | 0.72  | 0.45  | 0.17  |
| BG625063 | Cu/Zn superoxide dismutase                                            | -0.97 | -1.05 | -1.05 | -0.18 | 0.73  | 0.13  | 0.23  | 0.01  |
| BU462314 | amyloid beta protein binding protein 1                                | 0.01  | 0.35  | 1.54  | 0.41  | -2.13 | 1.11  | 0.42  | 0.29  |
| BU433747 | breakpoint cluster region protein                                     | -1.00 | -0.92 | -1.89 | -0.45 | -0.11 | 0.51  | 0.57  | 0.42  |
| BU267370 | paired box protein 6                                                  | 1.39  | 1.03  | 0.54  | 0.31  | 0.10  | -0.20 | -0.39 | -0.24 |
| BU471134 | homeobox protein HB9                                                  | -1.03 | -0.24 | -1.00 | -0.02 | -0.53 | 0.02  | 0.35  | 0.18  |
| BU308946 | microphthalmia-associated transcription factor                        | -1.49 | -1.57 | -0.45 | -1.10 | 0.60  | -0.58 | -0.53 | -0.84 |
| BU481178 | tropomyosin 3                                                         | 0.67  | 0.27  | 1.02  | 0.24  | -1.99 | 0.89  | 0.59  | 0.41  |
| BU317272 | tropomodulin 3                                                        | 0.77  | 0.66  | 1.46  | 0.19  | -2.87 | 1.14  | 0.48  | 0.59  |
| AW773317 | nucleoprotein TPR                                                     | 0.34  | 0.98  | 1.18  | 0.69  | -1.10 | 0.26  | 0.43  | 0.55  |
| BU105551 | hemoglobin epsilon chain                                              | 0.43  | -1.58 | -1.17 | -2.46 | -1.59 | -1.50 | -1.94 | -0.88 |

#### Functionally Unknown Genes

|          |                                                                                     |       |       |       |       |       |       |       |       |
|----------|-------------------------------------------------------------------------------------|-------|-------|-------|-------|-------|-------|-------|-------|
| BU464966 | Y17833 pol protein                                                                  | -0.89 | -1.55 | -1.83 | -1.02 | 0.93  | 0.24  | -0.55 | -0.70 |
| BF723781 | XAGL protein                                                                        | 0.04  | 0.47  | 0.72  | -0.33 | -2.11 | 1.08  | 0.09  | 0.32  |
| BU446630 | X99144                                                                              | 0.82  | -0.58 | 1.22  | -0.73 | -1.05 | 1.27  | -0.50 | -0.01 |
| BU229913 | X82209 MN1                                                                          | -1.57 | -1.07 | -1.96 | -0.78 | -0.98 | -0.95 | -0.05 | -0.48 |
| BU347508 | X76952 IAI3B                                                                        | -1.32 | -0.80 | -0.95 | -0.65 | -1.25 | -0.24 | -0.47 | -0.35 |
| BU230211 | WW domain binding protein 2 (WBP-2)                                                 | -0.02 | -1.27 | -1.43 | -1.15 | -0.30 | 0.04  | 0.24  | -0.12 |
| AJ448450 | Vpu-binding protein                                                                 | 1.74  | 1.35  | 1.00  | 0.85  | -1.27 | 0.07  | 0.24  | 0.38  |
| BU216004 | vbS1                                                                                | -0.68 | -0.62 | -2.18 | -1.39 | -1.16 | -1.25 | -0.77 | -0.76 |
| BU327260 | US 6512094                                                                          | -0.75 | -1.31 | -2.06 | -1.16 | 0.71  | -1.19 | -0.89 | -0.64 |
| BU121003 | UNC93A protein                                                                      | -0.50 | -1.66 | -1.85 | -0.76 | 0.74  | -0.47 | 0.22  | -0.51 |
| BU454480 | UL51                                                                                | -1.91 | -2.39 | -2.95 | -0.42 | 0.38  | 0.00  | 0.15  | 0.00  |
| BU334114 | tumor-related protein                                                               | 0.20  | 0.16  | 1.09  | 0.49  | -0.04 | 1.01  | 0.54  | 0.30  |
| BF723790 | tumor susceptibility protein 101                                                    | 1.84  | 1.04  | 0.44  | -0.25 | -0.09 | -0.43 | -0.06 | -0.20 |
| BE140038 | tumor susceptibility protein 101                                                    | 2.12  | 1.14  | 1.01  | -0.12 | -0.77 | 0.01  | 0.32  | 0.11  |
| BE139957 | tumor suppressor TSBF1                                                              | 0.42  | 0.56  | 1.29  | 0.10  | 0.04  | 1.02  | -0.02 | 0.34  |
| BU372732 | Tumor suppressor p53-binding protein 1                                              | -1.19 | -0.68 | -1.28 | -0.32 | 0.67  | -0.66 | -0.33 | -0.47 |
| BU211411 | tumor suppressing STF cDNA 5                                                        | -0.83 | -0.85 | -1.94 | -0.76 | 1.00  | 0.84  | 0.95  | 0.44  |
| BU354808 | Tumor necrosis factor type 1 receptor associated protein                            | 0.03  | 0.63  | 1.12  | 0.28  | -1.62 | 0.97  | -0.65 | 0.74  |
| BU449011 | tsec-1 protein (A and B)                                                            | -1.38 | -1.89 | -1.95 | -0.10 | 0.73  | 0.02  | 0.07  | -0.21 |
| BU130608 | TRF-proximal protein homolog                                                        | 1.05  | 0.55  | 1.26  | 0.68  | -0.10 | 0.92  | 0.89  | 0.54  |
| BU138948 | Thyroid receptor interacting protein 3 (TRIP-3)                                     | -1.13 | -0.82 | -1.01 | -0.70 | -0.92 | -0.79 | -0.76 | -0.58 |
| BG625574 | Thyroid hormone receptor-associated protein complex 150 kDa component (Trap150)     | 0.35  | 0.68  | 0.88  | 0.01  | -1.54 | 1.04  | -0.34 | 0.25  |
| BF723754 | thymopoietin beta                                                                   | 0.15  | 0.79  | 1.45  | 0.33  | -1.00 | 0.61  | 0.36  | 0.48  |
| BU278491 | Tetraspan NET-                                                                      | -0.48 | -0.12 | 1.02  | 0.12  | -1.52 | 1.28  | 0.28  | -0.10 |
| BU281482 | testis specific protein                                                             | -1.45 | -3.17 | -3.87 | -0.43 | 0.18  | -0.42 | -0.08 | -0.07 |
| BU443325 | Telethonin (Titin cap protein)                                                      | -1.61 | -1.28 | -2.01 | -0.55 | 0.92  | -0.47 | -0.37 | -0.06 |
| BU478192 | system A transporter isoform 2                                                      | -1.18 | -0.70 | -1.80 | -0.09 | -1.24 | -0.29 | -0.70 | -0.58 |
| BU455926 | Synaptojanin 2 binding protein                                                      | 2.06  | 1.45  | 1.14  | 0.47  | -0.66 | 0.72  | 0.04  | 0.34  |
| BU373928 | surfactant protein A                                                                | -0.80 | -1.72 | -2.78 | -0.94 | -0.27 | -0.56 | -0.25 | -0.14 |
| BU354746 | striated muscle UNC45                                                               | -0.39 | 0.07  | -0.82 | -1.33 | 0.24  | -1.04 | -0.31 | -0.17 |
| BU210720 | ST2                                                                                 | 2.30  | 1.54  | 0.94  | -0.05 | 1.09  | 0.83  | 0.61  | 0.84  |
| BU388505 | sporulation-induced transcript 4-associated protein SAPLA                           | 0.50  | 0.30  | 1.53  | 0.70  | 0.13  | 1.51  | 0.54  | 0.27  |
| BU317846 | spectrin alpha chain                                                                | 0.61  | 0.89  | 1.59  | 0.12  | 0.00  | 2.59  | 0.28  | 0.44  |
| BU208871 | Shb-like adapter protein, Shf                                                       | 1.32  | -0.05 | -0.07 | -2.05 | -2.18 | 0.42  | -1.10 | -0.43 |
| BU123908 | SGLT1 protein                                                                       | 0.91  | 0.74  | 1.08  | 0.65  | 1.04  | 0.86  | 0.41  | -0.07 |
| BU437519 | Serum/glucocorticoid-regulated kinase 1                                             | 1.39  | -0.07 | 0.08  | -0.94 | -2.17 | 0.51  | 0.16  | 0.24  |
| BU304534 | serine-rich protein                                                                 | 1.13  | 1.64  | 2.47  | 1.61  | 0.34  | 0.43  | 0.53  | 0.85  |
| BU333029 | Serine/threonine-protein kinase pim-3                                               | 1.59  | 1.54  | 0.95  | 0.45  | -0.74 | -0.17 | -0.14 | 0.48  |
| BU259299 | Serine/threonine kinase 17A(DAP kinase-related apoptosis-inducing protein kinase 1) | -0.20 | 0.02  | 1.00  | -0.11 | -0.67 | 1.01  | -0.30 | 0.08  |
| BU374735 | selective LIM binding factor                                                        | -0.65 | -0.50 | -1.91 | 0.18  | -2.83 | 0.26  | 0.42  | 0.31  |

|          |                                                                         |       |       |       |       |       |       |       |       |
|----------|-------------------------------------------------------------------------|-------|-------|-------|-------|-------|-------|-------|-------|
| BU249473 | SCA2                                                                    | -0.62 | -0.65 | -1.61 | -0.09 | -1.52 | -0.33 | -0.12 | -0.24 |
| BU408468 | Sarcolipin                                                              | -1.09 | -0.73 | -0.79 | -2.40 | 0.18  | -0.27 | -0.06 | 0.43  |
| BE139870 | RNase L inhibitor(Ribonuclease 4 inhibitor)                             | 0.79  | 1.12  | 1.58  | 0.52  | -1.12 | 1.13  | 0.56  | 0.74  |
| BF723980 | RNase L inhibitor (Ribonuclease 4 inhibitor)                            | 1.08  | 1.61  | 1.89  | 0.80  | -1.27 | 1.13  | 0.52  | 0.99  |
| BU288374 | RNA-binding protein                                                     | -0.68 | -0.57 | -1.46 | 0.29  | 1.64  | -0.66 | -0.08 | 0.01  |
| BU244041 | RNA splicing-related protein                                            | 0.44  | 0.43  | 1.52  | 1.04  | 0.05  | 0.88  | 0.36  | 0.24  |
| BG625519 | RING finger protein 23 (Testis-abundant finger protein)                 | 1.32  | 0.42  | 3.05  | 1.46  | 0.54  | -0.17 | -0.35 | -0.34 |
| AI981973 | RING finger protein 20                                                  | 0.15  | 1.12  | 0.86  | 1.28  | -0.42 | 0.84  | 0.42  | 0.76  |
| AI980449 | RING finger protein 19 (p38 protein)                                    | -0.71 | -0.63 | 0.66  | 1.30  | -2.39 | 0.39  | 1.06  | 0.51  |
| BU295632 | ring finger protein 15                                                  | 3.03  | 1.81  | 2.18  | 0.81  | -1.13 | 1.07  | 1.13  | 0.74  |
| BU470523 | Ribulose biphosphate carboxylase small chain 1(RuBisCO small subunit 1) | 0.32  | 0.78  | 0.97  | 0.22  | -1.08 | 1.30  | 0.28  | 0.62  |
| BU133052 | Ribose methyltransferase PET56                                          | -0.86 | -1.03 | -1.70 | -1.66 | -1.01 | -0.77 | -0.56 | -0.58 |
| BG625735 | Ribonuclease homolog (RSFR)                                             | 3.09  | 3.11  | 2.69  | 1.56  | -0.36 | 0.17  | 0.04  | 0.12  |
| BU480533 | Rh blood D group antigen polypeptide                                    | -0.45 | -1.39 | -1.09 | -0.81 | 0.79  | -0.75 | -0.66 | -0.76 |
| BU230492 | reverse transcriptase, pol-like                                         | -1.01 | -0.77 | -1.56 | -0.84 | -0.12 | -0.87 | -0.41 | -0.27 |
| BU382078 | Retinoic acid- inducible E3 protein                                     | 3.03  | 2.61  | 2.77  | 1.82  | -0.50 | 0.49  | 0.58  | 0.98  |
| AW773257 | Retinoic acid- inducible E3 protein                                     | 2.72  | 2.25  | 2.40  | 1.54  | -0.57 | 0.17  | 0.40  | 0.75  |
| BU231671 | retinoblastoma-associated protein HEC                                   | 0.48  | 1.08  | 1.92  | 0.68  | 0.26  | 0.55  | 0.08  | 0.29  |
| BU414108 | retinal short-chain dehydrogenase/reductase                             | -1.45 | -0.76 | -1.25 | -0.38 | -0.33 | -0.48 | -0.57 | -0.66 |
| BU334252 | regulatory subunit of PP2A                                              | 0.40  | 0.28  | 1.24  | 0.63  | 1.00  | 0.61  | 0.33  | 0.25  |
| BU126737 | RE67445p                                                                | -1.19 | -0.84 | -1.45 | -0.23 | 0.58  | -0.66 | -0.19 | -0.29 |
| BU332787 | RALBP1                                                                  | -0.03 | 0.14  | 1.02  | -0.40 | -1.67 | 0.61  | -0.16 | 0.00  |
| BU445806 | ral guanine nucleotide dissociation stimulator                          | 0.93  | 0.83  | 1.22  | 0.33  | 0.04  | 1.32  | 0.54  | 0.88  |
| BU353207 | radial spoke protein 3                                                  | -0.88 | -1.56 | -2.71 | -0.30 | -0.50 | -0.01 | 0.16  | -0.20 |
| BU206834 | Rabkinesin-6 (RAB6-interacting kinesin-like protein)                    | -0.29 | 1.52  | 1.35  | 0.14  | 0.18  | 0.54  | 0.17  | 0.33  |
| AJ456485 | prothymosin alpha                                                       | 0.01  | 1.32  | 1.01  | 0.67  | 1.11  | -0.04 | 0.05  | -0.03 |
| BG625660 | protein-100                                                             | 0.03  | 1.73  | 1.81  | 1.23  | -0.49 | 0.33  | 0.09  | 0.06  |
| BU427110 | Protein mlo2                                                            | 2.16  | 0.97  | 1.54  | 0.54  | -0.71 | 1.45  | 0.50  | 0.86  |
| BU355572 | Protein disulfide isomerase A4(Calcium-binding protein 2)               | 0.58  | 0.27  | 2.10  | 0.34  | -1.96 | 2.67  | 0.47  | 0.89  |
| BU303631 | protease domain of endotheliase 1                                       | -0.69 | -3.01 | -2.86 | -2.46 | 1.06  | -0.92 | -0.36 | -0.57 |
| BU213155 | Prostaglandin F2 receptor negative regulator (CD9 partner 1)            | -0.88 | -0.90 | -1.20 | -0.91 | 1.34  | -0.47 | -0.52 | -1.14 |
| BG625489 | Proline-rich protein 2 (B4-2 protein)                                   | 1.02  | 0.21  | 1.14  | 0.51  | 0.17  | 0.29  | 0.08  | 0.13  |
| BU324247 | proline-rich extensin-like protein                                      | 1.03  | 0.26  | 1.83  | 0.32  | -0.61 | 0.96  | 0.37  | 0.22  |
| BU361056 | Presenilin beta                                                         | -1.18 | -0.66 | -1.34 | -0.40 | 0.07  | -0.31 | -0.10 | -0.11 |
| BU481487 | pregnancy-induced growth inhibitor OKL38                                | 0.80  | 0.04  | -0.05 | -0.14 | -1.52 | 1.16  | 0.79  | 1.27  |
| BU435871 | pregnancy-induced growth inhibitor OKL38                                | 0.83  | -0.02 | -0.04 | -0.13 | -1.33 | 1.13  | 0.78  | 1.44  |
| BG625060 | Pr57 env polyprotein                                                    | 0.17  | -4.29 | -2.41 | -5.66 | -0.49 | -0.96 | -1.21 | -0.81 |
| BU131052 | Potential phospholipid-transporting ATPase IIA                          | -1.62 | -1.04 | -1.80 | -0.87 | 0.34  | -0.78 | -0.35 | -0.66 |
| BU357463 | Post-proline cleaving enzyme                                            | 0.15  | 0.55  | 1.12  | 0.00  | -1.25 | 0.81  | 0.21  | 0.71  |
| BU135320 | polypyrimidine tract-binding protein PTB-1                              | 0.70  | 1.10  | 0.87  | 0.44  | -2.00 | 0.35  | 0.19  | 0.58  |
| BU264865 | PNAS-106                                                                | 1.23  | 1.21  | 0.72  | 0.75  | 0.57  | -0.04 | -0.32 | -0.18 |
| BU278879 | plenty-of-prolines-101/ SH3-philo-protein                               | 0.35  | 0.98  | 0.84  | 0.46  | -1.86 | 1.01  | 0.27  | 0.64  |
| BU352798 | plasma membrane proton pump H+ ATPase                                   | 0.28  | 0.44  | 0.83  | 0.55  | -0.66 | 1.40  | 1.00  | 0.68  |
| BU367730 | Placental protein 6                                                     | -0.86 | -0.22 | -1.09 | -0.41 | -1.18 | -0.65 | -0.19 | -0.32 |
| BU490446 | Piwi/Argonaute family protein melF2C3                                   | 0.31  | 1.11  | 0.69  | -0.16 | -2.33 | 0.50  | -0.20 | 0.49  |
| BU310968 | PINCH protein (Particularly interesting new Cys-His protein)            | 0.83  | 1.24  | 1.11  | 0.29  | -0.80 | 0.72  | 0.26  | 0.00  |
| BU210641 | PIBF1 protein                                                           | -0.55 | -1.16 | -1.46 | -0.12 | 0.60  | -0.55 | -0.30 | -0.28 |
| BF723723 | phospholipase C, gamma 2                                                | 0.52  | 0.32  | 1.63  | 0.07  | -0.03 | 1.11  | 0.27  | 0.48  |
| BM293865 | Phosphatidylethanolamine-binding protein (PEBP)                         | -1.28 | -0.93 | -1.29 | -0.32 | 0.42  | 0.24  | 0.11  | -0.15 |
| BU209465 | PGRS family protein                                                     | 0.67  | -0.22 | -1.32 | -1.02 | 0.21  | -0.99 | -0.71 | -0.93 |
| BU387079 | Peroxisome biogenesis factor 1 (Peroxin-1)                              | 0.25  | 0.24  | 1.06  | 0.15  | 0.02  | 1.22  | 0.30  | 0.27  |
| BU439544 | PE_PGRS                                                                 | 0.81  | 0.78  | 1.50  | 0.22  | -1.44 | 1.04  | 0.86  | 1.12  |
| BU364046 | P0705A05.3                                                              | 0.39  | 1.35  | 0.61  | 0.87  | 1.50  | 0.61  | 0.32  | 0.62  |
| BU482128 | P0698A10.17                                                             | 0.90  | 0.45  | 1.81  | 0.66  | -0.63 | 1.10  | 0.42  | 0.68  |
| AI980505 | P0498A12.26                                                             | 0.43  | 1.26  | 1.96  | 2.24  | 1.53  | 0.47  | 0.25  | 0.66  |
| BG625767 | Ovotransferrin (Conalbumin)                                             | -0.35 | -0.63 | -1.83 | -0.93 | -1.09 | -0.31 | 0.15  | -0.75 |
| BU444276 | OSJNBb0032K15.13                                                        | -1.08 | -0.90 | -1.23 | -0.51 | -0.29 | -0.45 | -0.10 | -0.19 |
| BU205868 | OJ1656_E11.14                                                           | -1.41 | -0.40 | -1.27 | 0.58  | -0.24 | -0.61 | -0.36 | 0.29  |
| BF845737 | nucleolar protein ANKT                                                  | -0.17 | 1.54  | 1.48  | 1.01  | 0.08  | -0.16 | -0.26 | -0.09 |
| BF845705 | nucleolar protein ANKT                                                  | 0.17  | 1.66  | 1.35  | 1.15  | 0.29  | -0.24 | -0.14 | 0.25  |
| BU349357 | nuclear protein SR-25                                                   | 0.43  | 0.65  | 1.78  | 1.01  | 0.62  | 1.11  | 0.37  | 0.32  |

|          |                                                                      |       |       |       |       |       |       |       |       |
|----------|----------------------------------------------------------------------|-------|-------|-------|-------|-------|-------|-------|-------|
| BU395520 | nuclear protein SA-2                                                 | 0.01  | 0.37  | 2.03  | -0.16 | -0.15 | 2.39  | -0.15 | 0.14  |
| BU397923 | Nuclear protein Hcc-1                                                | -0.04 | 0.87  | 0.93  | 0.84  | -1.36 | 1.04  | -0.17 | 1.24  |
| BU384557 | Nuclear pore complex protein Nup88                                   | 0.60  | 1.22  | 1.16  | 0.36  | -2.06 | 0.66  | 0.52  | 0.60  |
| BU395478 | Nuclear pore complex protein Nup107                                  | 0.21  | 1.10  | 1.09  | 0.30  | -1.37 | 0.98  | 0.38  | 0.15  |
| BU316209 | NSE1 protein                                                         | -1.15 | -1.61 | -2.00 | -1.54 | 0.12  | -0.59 | -0.70 | -0.69 |
| AI981012 | Normal mucosa of esophagus specific gene 1 protein (FOAP-11 protein) | 3.63  | 1.35  | 1.29  | 0.67  | 2.03  | 0.92  | 0.87  | 0.16  |
| BE139951 | no similarities to reported gene products                            | 1.76  | 0.59  | 1.03  | 0.28  | -0.25 | 1.15  | 0.62  | 0.54  |
| BU128296 | Neuroserpin (Axonin-2)                                               | -0.89 | -1.74 | -2.14 | -0.91 | 0.22  | -0.09 | -0.05 | 0.18  |
| BU359867 | nebulin-related anchoring protein isoform S                          | -0.86 | -1.25 | -1.78 | -3.05 | -0.73 | -1.24 | -0.97 | -0.52 |
| BU492718 | NA                                                                   | -1.20 | -1.16 | -0.87 | -0.93 | -0.62 | -0.69 | -0.71 | -0.65 |
| BU487305 | NA                                                                   | -1.88 | -1.43 | -1.49 | -0.20 | 0.15  | -0.37 | -0.32 | -0.47 |
| BU486168 | NA                                                                   | -1.06 | -0.41 | -0.96 | -0.19 | 1.31  | -0.07 | 0.10  | -0.40 |
| BU485524 | NA                                                                   | 1.64  | 1.11  | 1.19  | 0.43  | -0.45 | -0.10 | -0.35 | -0.17 |
| BU484690 | NA                                                                   | -1.17 | -1.01 | -0.95 | -0.24 | -0.25 | -0.67 | -0.37 | -0.24 |
| BU484362 | NA                                                                   | -1.01 | -1.02 | -1.05 | -0.31 | 0.37  | -0.16 | 0.46  | 0.55  |
| BU481589 | NA                                                                   | -1.07 | -1.54 | -1.58 | -0.96 | -1.21 | -0.82 | -0.59 | -0.64 |
| BU480102 | NA                                                                   | -0.24 | 0.71  | 0.53  | -0.60 | -1.35 | 1.10  | -0.53 | 0.01  |
| BU480077 | NA                                                                   | 0.28  | 0.65  | 1.61  | 0.47  | 0.13  | 1.17  | -0.07 | 0.01  |
| BU479594 | NA                                                                   | 0.67  | 1.13  | 1.99  | 0.66  | -0.10 | 0.94  | 0.16  | 0.33  |
| BU479047 | NA                                                                   | 0.70  | 1.32  | 1.13  | 0.88  | -0.19 | 0.88  | 0.24  | 0.52  |
| BU477113 | NA                                                                   | -0.35 | -0.96 | -1.23 | -2.01 | -1.18 | -0.55 | -0.64 | -0.56 |
| BU476251 | NA                                                                   | -1.04 | -1.10 | -1.45 | -0.08 | 0.95  | -0.02 | -0.02 | 0.18  |
| BU475934 | NA                                                                   | -0.77 | -0.56 | -1.19 | 0.22  | 1.50  | -0.32 | 0.16  | -0.19 |
| BU475471 | NA                                                                   | -1.55 | -1.31 | -2.23 | -0.58 | 0.95  | -0.51 | -0.41 | -0.38 |
| BU472262 | NA                                                                   | 1.22  | 0.45  | -0.52 | -0.25 | -1.55 | -0.45 | -0.11 | -0.24 |
| BU471206 | NA                                                                   | 0.19  | 0.02  | 1.16  | 0.01  | -0.71 | 1.06  | -0.06 | 0.04  |
| BU470394 | NA                                                                   | -1.04 | -1.34 | -1.31 | -0.31 | 0.37  | -0.42 | -0.10 | -0.28 |
| BU470254 | NA                                                                   | -1.47 | -0.95 | -1.08 | 0.37  | 1.41  | -0.09 | 0.35  | -0.21 |
| BU469937 | NA                                                                   | -2.50 | -2.94 | -4.39 | -0.07 | -0.87 | -0.89 | -0.38 | -0.48 |
| BU468871 | NA                                                                   | -0.53 | -0.30 | -1.04 | -0.42 | 1.24  | -0.82 | -0.14 | -0.21 |
| BU467335 | NA                                                                   | 1.73  | 1.89  | 0.96  | 0.31  | 1.12  | -0.42 | -0.14 | 0.10  |
| BU467290 | NA                                                                   | 0.92  | 0.81  | 1.02  | 0.32  | -1.45 | 0.61  | 0.03  | 0.68  |
| BU467079 | NA                                                                   | 0.02  | -0.98 | -1.30 | -1.08 | 0.14  | -0.59 | -0.42 | -0.31 |
| BU465764 | NA                                                                   | 1.04  | 1.22  | 1.05  | 0.27  | -1.43 | 0.48  | 0.41  | 0.50  |
| BU465437 | NA                                                                   | -0.03 | 1.76  | 1.41  | 0.79  | 0.12  | 0.03  | -0.03 | 0.11  |
| BU464674 | NA                                                                   | -1.80 | -1.28 | -2.21 | 0.96  | 1.16  | -0.33 | 0.14  | 0.14  |
| BU464464 | NA                                                                   | -0.95 | -1.02 | -1.39 | -1.04 | 0.27  | -0.59 | -0.41 | -0.60 |
| BU463893 | NA                                                                   | -1.18 | -1.24 | -1.58 | 0.54  | -0.28 | -0.22 | 0.11  | 0.07  |
| BU461792 | NA                                                                   | -1.07 | -0.97 | -1.49 | -0.37 | 0.65  | -0.49 | 0.00  | -0.53 |
| BU461482 | NA                                                                   | 0.36  | 1.03  | 0.84  | 0.50  | 1.61  | 0.87  | 0.55  | 0.36  |
| BU461320 | NA                                                                   | -0.59 | -0.65 | -1.57 | -1.61 | -1.83 | -0.79 | -0.10 | 0.28  |
| BU461075 | NA                                                                   | -0.51 | 0.01  | -1.07 | -0.33 | 1.26  | -0.26 | 0.02  | 0.08  |
| BU459969 | NA                                                                   | -0.68 | -1.54 | -1.49 | 0.24  | 0.69  | -0.29 | -0.17 | -0.11 |
| BU459627 | NA                                                                   | 3.65  | 1.84  | 1.85  | 0.96  | 1.53  | 0.01  | 0.45  | 0.71  |
| BU459251 | NA                                                                   | -0.85 | -1.58 | -2.12 | 0.27  | 0.76  | 0.80  | 0.60  | 0.29  |
| BU459237 | NA                                                                   | -1.06 | -0.35 | -1.12 | 0.19  | 1.07  | -0.78 | -0.28 | -0.17 |
| BU459058 | NA                                                                   | 0.35  | 0.72  | 1.95  | 0.55  | -0.29 | 1.64  | 0.51  | 0.37  |
| BU458812 | NA                                                                   | -0.53 | -0.47 | -1.12 | -1.11 | -0.44 | -0.66 | -0.41 | -0.62 |
| BU458279 | NA                                                                   | -1.09 | -0.27 | -1.16 | -0.17 | -0.54 | -0.43 | -0.20 | -0.33 |
| BU458066 | NA                                                                   | -1.49 | -1.30 | -2.12 | -0.04 | -0.30 | -0.32 | -0.04 | 0.19  |
| BU457728 | NA                                                                   | -1.09 | -1.06 | -2.75 | 0.09  | 0.66  | 0.16  | 0.72  | 0.39  |
| BU457655 | NA                                                                   | -0.07 | 2.42  | 1.82  | 1.35  | 0.58  | -0.07 | -0.06 | -0.04 |
| BU456729 | NA                                                                   | 0.09  | -0.75 | -1.06 | -1.01 | 0.09  | -0.79 | -0.64 | -0.39 |
| BU456058 | NA                                                                   | -0.72 | 0.11  | 0.19  | -0.27 | -2.62 | 1.30  | 0.20  | 0.53  |
| BU454538 | NA                                                                   | -0.54 | -0.92 | -1.36 | -0.92 | 1.14  | -0.12 | 0.16  | -0.26 |
| BU453497 | NA                                                                   | 1.77  | 1.21  | 2.41  | -0.12 | -0.91 | 1.27  | 0.35  | 0.14  |
| BU453381 | NA                                                                   | 1.70  | 0.64  | 1.40  | 0.39  | -1.43 | 1.94  | 1.47  | 1.14  |
| BU452731 | NA                                                                   | 0.22  | 0.21  | 0.81  | -0.58 | -1.43 | 1.20  | -0.49 | 0.65  |
| BU451644 | NA                                                                   | 0.45  | -0.15 | -1.31 | -1.36 | -0.83 | -0.96 | -0.58 | -0.64 |
| BU450116 | NA                                                                   | 1.23  | 1.11  | 1.29  | 0.73  | 0.06  | 0.91  | 0.64  | 0.04  |
| BU449966 | NA                                                                   | 0.43  | 0.29  | -0.45 | -0.92 | -1.37 | -1.09 | -0.66 | -0.39 |



|          |    |       |       |       |       |       |       |       |       |
|----------|----|-------|-------|-------|-------|-------|-------|-------|-------|
| BU449736 | NA | 2.17  | 1.18  | 1.17  | -0.85 | -0.36 | -0.51 | -0.50 | -0.56 |
| BU449497 | NA | 0.30  | 0.60  | 1.60  | 0.25  | -1.45 | 0.90  | 0.13  | 0.38  |
| BU447975 | NA | 1.76  | 1.38  | 1.14  | -0.10 | -0.84 | 0.39  | -0.04 | -0.20 |
| BU447874 | NA | -0.82 | -1.19 | -1.53 | -0.08 | 0.40  | -0.03 | -0.04 | -0.16 |
| BU447866 | NA | -1.84 | -1.78 | -2.43 | -0.54 | 0.73  | -0.65 | -0.42 | -0.74 |
| BU447693 | NA | 0.65  | 0.18  | -1.03 | -1.09 | 1.36  | -0.29 | -0.50 | -0.18 |
| BU447283 | NA | 1.15  | 0.64  | 0.64  | 0.12  | 1.21  | -0.45 | -0.59 | -0.73 |
| BU446686 | NA | -1.12 | -0.71 | -0.60 | -0.15 | 1.36  | -0.31 | -0.20 | -0.11 |
| BU446378 | NA | -1.47 | -2.19 | -2.62 | -0.75 | 0.48  | -0.39 | 0.10  | -0.05 |
| BU446050 | NA | -0.72 | -1.85 | -2.63 | -1.10 | -0.67 | 0.23  | 0.30  | 0.07  |
| BU445915 | NA | 2.02  | 1.71  | 0.83  | 0.34  | -0.26 | -0.74 | -0.41 | -0.80 |
| BU445348 | NA | -1.13 | -1.07 | -1.50 | -0.18 | -0.09 | -0.77 | -0.28 | -0.62 |
| BU444976 | NA | 1.06  | 1.21  | 0.49  | -0.09 | -0.95 | 0.28  | 0.18  | 0.29  |
| BU444883 | NA | 0.43  | 0.34  | 1.37  | 0.00  | -1.16 | 0.30  | 0.02  | 0.14  |
| BU443543 | NA | 0.26  | 0.50  | 1.48  | -0.21 | -0.41 | 1.79  | 0.00  | 0.46  |
| BU443309 | NA | -0.81 | -2.03 | -2.25 | -0.22 | -0.11 | -0.10 | 0.08  | -0.08 |
| BU443126 | NA | 0.44  | 1.13  | 1.25  | 0.00  | -1.63 | 1.05  | 0.62  | 1.13  |
| BU442238 | NA | -0.49 | 0.12  | -1.49 | -1.95 | -1.49 | -0.61 | -0.04 | 0.20  |
| BU439412 | NA | 0.90  | 1.35  | 2.97  | 1.31  | 1.31  | -0.08 | 0.14  | 0.40  |
| BU439228 | NA | -1.36 | -0.07 | -1.43 | -1.16 | -0.31 | -0.72 | -0.97 | -0.52 |
| BU439153 | NA | -0.12 | -0.20 | -1.11 | 0.08  | 1.16  | -0.26 | 0.03  | 0.06  |
| BU438690 | NA | -1.12 | -1.62 | -2.23 | -0.26 | -0.12 | -0.40 | -0.04 | -0.01 |
| BU438459 | NA | 0.57  | 0.57  | 1.40  | 0.59  | -0.87 | 1.63  | 0.47  | 0.58  |
| BU438221 | NA | -0.13 | -0.12 | -0.38 | -1.77 | -1.65 | 0.39  | 0.27  | 0.78  |
| BU438218 | NA | -0.18 | -0.32 | 0.70  | -1.01 | -1.28 | 1.21  | -0.86 | -0.14 |
| BU438182 | NA | 1.15  | 0.25  | 1.45  | 0.41  | -0.85 | 1.76  | 0.46  | 0.37  |
| BU438042 | NA | 2.94  | 2.59  | 1.53  | 1.50  | -0.06 | 0.18  | 0.52  | 0.45  |
| BU436060 | NA | 3.57  | 0.78  | 0.98  | 0.13  | 0.70  | 2.21  | 0.82  | 0.90  |
| BU435320 | NA | -1.81 | -1.92 | -3.29 | -0.53 | 0.13  | -0.71 | -0.27 | -0.30 |
| BU434366 | NA | 0.03  | -0.13 | -1.52 | -1.46 | -1.21 | -1.17 | -0.72 | -0.79 |
| BU434187 | NA | 0.31  | -0.05 | 0.73  | -0.39 | -1.39 | 1.84  | 0.62  | 0.68  |
| BU434036 | NA | -1.30 | -1.64 | -1.48 | 0.05  | 0.88  | -0.41 | 0.02  | -0.11 |
| BU432835 | NA | -1.68 | -0.26 | -1.60 | -0.99 | 0.54  | -1.02 | -0.67 | -0.74 |
| BU432471 | NA | 5.75  | 4.61  | 3.91  | 0.41  | 0.41  | 3.33  | 0.23  | 2.02  |
| BU431862 | NA | 1.51  | 1.16  | 0.95  | -0.17 | -0.16 | -0.13 | -0.22 | -0.06 |
| BU427890 | NA | 0.38  | 1.12  | 0.96  | 1.13  | 1.13  | 0.48  | 0.05  | -0.06 |
| BU425921 | NA | -0.12 | -0.26 | -1.11 | -0.19 | 1.21  | -0.48 | 0.14  | -0.16 |
| BU424831 | NA | 0.69  | 0.33  | 1.53  | -0.05 | -0.51 | 1.54  | 0.09  | 0.21  |
| BU424141 | NA | -1.30 | -0.33 | -0.85 | 0.58  | 1.54  | -0.03 | -0.08 | -0.09 |
| BU423293 | NA | 0.41  | 1.14  | 1.11  | -0.13 | -0.74 | 1.73  | -0.14 | 0.15  |
| BU423292 | NA | -0.45 | -1.19 | -0.62 | -0.83 | -1.83 | -0.64 | -0.38 | -0.46 |
| BU423181 | NA | -1.08 | -0.28 | -0.19 | -0.16 | -0.03 | -1.03 | -0.50 | -0.56 |
| BU422537 | NA | 0.80  | 0.39  | 1.93  | 0.17  | -1.01 | 0.87  | -0.04 | 0.22  |
| BU421563 | NA | 1.65  | 0.49  | -0.19 | -0.46 | -1.49 | 0.29  | 0.32  | 0.66  |
| BU421408 | NA | -1.15 | -0.70 | -1.03 | -0.87 | 0.83  | -0.46 | -0.39 | -0.51 |
| BU420703 | NA | 0.10  | -1.16 | -1.13 | -0.77 | 1.02  | -0.60 | -0.57 | -0.40 |
| BU420697 | NA | -1.95 | -2.90 | -3.31 | -0.44 | 0.40  | -0.51 | -0.21 | -0.67 |
| BU420558 | NA | -1.11 | -1.55 | -2.69 | -0.65 | 0.01  | 0.24  | 0.30  | 0.25  |
| BU420450 | NA | 0.01  | -0.35 | -1.03 | -0.94 | 0.41  | -0.74 | -0.82 | -1.14 |
| BU420365 | NA | 0.15  | -0.07 | 1.62  | 0.14  | -0.79 | 1.35  | -0.07 | -0.36 |
| BU420215 | NA | -1.48 | -0.76 | -1.57 | -0.16 | 0.17  | -0.47 | -0.18 | -0.29 |
| BU419449 | NA | -0.11 | -0.80 | -2.15 | -1.75 | -0.05 | -0.99 | -0.83 | -0.76 |
| BU418946 | NA | -1.12 | -0.93 | -1.32 | -0.50 | 0.14  | -0.78 | -0.50 | -0.42 |
| BU418756 | NA | 0.16  | 0.32  | 1.29  | 0.19  | 0.10  | 1.05  | -0.01 | -0.07 |
| BU418029 | NA | 0.90  | -0.31 | 0.33  | -1.07 | -1.14 | -0.38 | -0.28 | -0.66 |
| BU417597 | NA | 1.88  | 0.70  | 2.02  | 0.65  | -0.85 | 0.69  | 0.34  | 0.50  |
| BU414936 | NA | 0.07  | -0.64 | -1.36 | -1.95 | -3.03 | -1.13 | -0.72 | -0.91 |
| BU414008 | NA | -0.52 | -0.33 | -1.21 | -0.89 | 1.22  | -0.95 | 0.40  | 0.72  |
| BU413535 | NA | 1.38  | -0.48 | -0.01 | 0.37  | 0.10  | -1.05 | -0.86 | -1.00 |
| BU412599 | NA | -0.84 | -1.20 | -0.83 | -0.78 | -0.45 | -1.24 | -1.02 | -0.60 |
| BU412426 | NA | -0.47 | -0.15 | 0.25  | -0.61 | -1.24 | 1.24  | -0.75 | -0.31 |
| BU411106 | NA | -0.29 | -0.32 | 1.02  | -0.46 | -1.24 | 0.98  | -0.55 | 0.17  |

|          |    |       |       |       |       |       |       |       |       |
|----------|----|-------|-------|-------|-------|-------|-------|-------|-------|
| BU410932 | NA | -0.89 | -1.08 | -1.30 | -3.34 | -0.96 | -0.76 | -0.74 | 0.20  |
| BU410571 | NA | -0.21 | -0.99 | -1.15 | -1.01 | -4.28 | -0.79 | -0.35 | -0.17 |
| BU409510 | NA | 1.10  | 1.18  | 0.43  | -0.01 | 0.58  | -0.63 | -0.40 | -0.07 |
| BU403660 | NA | -0.12 | 1.50  | 1.61  | 0.25  | -0.45 | 0.24  | -0.14 | 0.26  |
| BU403514 | NA | -0.04 | -1.18 | 0.10  | -0.61 | -1.02 | -0.13 | -0.24 | -0.63 |
| BU402913 | NA | 0.17  | 1.14  | 1.42  | 0.75  | 0.10  | 0.25  | 0.32  | 0.17  |
| BU402164 | NA | -1.55 | -0.99 | -1.05 | -0.32 | 1.50  | -0.58 | -0.25 | -0.45 |
| BU401950 | NA | 5.53  | 3.84  | 3.32  | 0.66  | 1.09  | 0.31  | 0.87  | -0.36 |
| BU400667 | NA | -0.50 | -0.62 | -1.61 | -0.89 | -1.91 | 0.04  | -0.07 | -0.18 |
| BU397147 | NA | -1.34 | -0.93 | -1.71 | 0.32  | 0.76  | -0.63 | -0.05 | -0.37 |
| BU396045 | NA | 0.78  | -0.31 | 1.50  | 0.29  | 0.05  | 1.19  | 0.27  | -0.09 |
| BU395099 | NA | -0.45 | -0.68 | -1.24 | -1.00 | 0.93  | -0.50 | -0.44 | -0.26 |
| BU394622 | NA | -0.89 | -1.67 | -2.28 | -0.51 | -0.87 | -0.38 | 0.17  | 0.18  |
| BU393628 | NA | -0.33 | -1.18 | -1.82 | -1.23 | 0.38  | -0.45 | -0.03 | -0.53 |
| BU393594 | NA | -0.91 | -1.55 | -2.37 | -0.58 | -0.79 | 0.60  | 0.59  | -0.53 |
| BU393257 | NA | -0.44 | -0.08 | -0.55 | 1.48  | 1.52  | 0.52  | 0.67  | -0.08 |
| BU391732 | NA | 0.78  | 1.17  | 2.88  | 1.32  | 2.25  | 0.34  | 0.18  | 0.84  |
| BU391346 | NA | 0.32  | 0.26  | 0.88  | -0.77 | -1.23 | 1.48  | -0.37 | 0.35  |
| BU389582 | NA | 1.65  | 0.34  | 0.15  | -0.12 | 1.45  | -0.32 | -0.02 | 0.04  |
| BU389334 | NA | 0.33  | 1.08  | 0.29  | 0.75  | 1.01  | 0.44  | 0.56  | 0.37  |
| BU388765 | NA | -0.70 | -0.67 | -1.08 | -0.09 | 0.86  | -1.01 | -0.36 | -0.07 |
| BU388671 | NA | 0.45  | 0.39  | 1.15  | 0.21  | 0.10  | 1.55  | 0.36  | -0.02 |
| BU387622 | NA | 0.32  | 0.62  | 1.05  | 0.04  | 0.26  | 1.24  | 0.03  | 0.15  |
| BU387512 | NA | -0.33 | -0.90 | -1.10 | -0.66 | 1.35  | -0.20 | -0.37 | -0.98 |
| BU387420 | NA | 0.12  | 0.07  | 0.02  | 1.39  | 1.65  | 0.00  | 0.33  | 0.28  |
| BU387125 | NA | 1.06  | 1.11  | 1.35  | 0.27  | 0.00  | 0.55  | 0.07  | 0.18  |
| BU387087 | NA | 0.37  | 1.54  | 1.06  | 0.55  | 0.54  | 0.05  | 0.03  | 0.08  |
| BU386839 | NA | -0.65 | -1.01 | -1.04 | -0.22 | -0.25 | 0.20  | 0.10  | 0.16  |
| BU384974 | NA | -0.27 | -0.68 | -1.51 | -1.00 | -0.49 | -0.42 | -0.06 | -0.14 |
| BU384621 | NA | -0.40 | 0.50  | 0.00  | 1.22  | 1.52  | -0.19 | 0.40  | 0.09  |
| BU384585 | NA | 0.77  | 1.15  | 1.40  | 0.14  | -1.90 | 0.57  | 0.21  | 0.84  |
| BU383239 | NA | -0.57 | -0.33 | -1.31 | -1.07 | -1.76 | -0.58 | -0.35 | -0.22 |
| BU382987 | NA | -0.45 | -1.17 | -1.45 | -0.35 | -0.20 | -1.16 | -0.49 | -1.03 |
| BU382921 | NA | -0.07 | -0.51 | -1.51 | -1.47 | -1.81 | -0.79 | -0.34 | -0.46 |
| BU382625 | NA | 2.75  | 1.21  | 0.99  | 0.09  | 0.81  | -0.02 | -0.03 | 0.39  |
| BU382468 | NA | 0.03  | 0.30  | -0.51 | -1.24 | -1.02 | -0.18 | -0.06 | -0.14 |
| BU382327 | NA | -0.92 | -0.77 | -1.09 | -0.50 | 1.77  | -0.34 | -0.12 | -0.38 |
| BU382198 | NA | -1.12 | -0.66 | -1.01 | -0.36 | -0.27 | 0.13  | 0.30  | 0.07  |
| BU379558 | NA | -0.99 | -1.18 | -1.86 | -0.65 | 1.31  | -1.00 | -0.39 | -0.56 |
| BU377344 | NA | -1.20 | -1.38 | -1.48 | -0.67 | -0.27 | -0.30 | -0.20 | -0.34 |
| BU376440 | NA | 0.68  | 0.15  | -1.00 | -0.25 | -1.64 | -0.18 | 0.07  | 0.49  |
| BU376094 | NA | -0.14 | -0.17 | -2.25 | -1.27 | -3.12 | 0.23  | -0.09 | -0.26 |
| BU376036 | NA | 0.41  | 0.40  | 1.96  | 0.28  | -2.48 | 1.25  | 0.14  | 0.58  |
| BU374280 | NA | -1.06 | -1.35 | -1.85 | -1.31 | -0.98 | -0.98 | -0.58 | -0.46 |
| BU374205 | NA | 0.18  | 1.37  | 0.91  | 1.24  | 1.36  | 0.28  | 0.19  | -0.20 |
| BU373447 | NA | -1.16 | -0.28 | -0.45 | 0.51  | -1.29 | -0.40 | -0.46 | -0.14 |
| BU372313 | NA | -1.02 | -0.47 | -1.41 | 0.00  | 0.65  | -0.28 | 0.06  | -0.24 |
| BU371728 | NA | -0.33 | -0.32 | -0.64 | -1.08 | -1.11 | -0.16 | 0.17  | -0.12 |
| BU369293 | NA | -0.57 | -1.15 | -1.18 | 0.42  | -0.19 | 0.18  | 0.38  | 0.33  |
| BU368765 | NA | -1.28 | -1.18 | -2.32 | -1.28 | 0.09  | -0.65 | -0.06 | -0.34 |
| BU368655 | NA | -1.37 | -1.25 | -1.20 | -0.20 | -0.80 | -0.46 | -0.16 | -0.27 |
| BU368594 | NA | -0.48 | -1.09 | -1.14 | -0.72 | 0.42  | 0.64  | -0.02 | 0.44  |
| BU368411 | NA | -1.50 | -1.02 | -1.40 | -0.54 | 0.58  | -0.70 | -0.35 | -0.23 |
| BU367449 | NA | -0.78 | -1.10 | -1.29 | -0.80 | 0.98  | -0.55 | -0.03 | -0.29 |
| BU366973 | NA | -1.95 | -2.51 | -3.11 | 0.08  | -0.28 | -0.40 | 0.39  | -0.39 |
| BU366847 | NA | -1.65 | -2.44 | -2.93 | 0.01  | 0.27  | -0.34 | 0.32  | -0.10 |
| BU366284 | NA | -0.50 | -1.71 | -1.70 | -0.88 | -0.57 | 2.05  | 0.17  | -0.15 |
| BU365966 | NA | -2.00 | -2.75 | -5.36 | -0.80 | -0.47 | -0.51 | -0.02 | 0.04  |
| BU364807 | NA | -0.52 | -1.19 | -1.59 | -0.71 | -0.18 | -0.80 | -0.67 | -0.52 |
| BU363403 | NA | 0.38  | -0.92 | -1.62 | -1.28 | 0.82  | -0.19 | 0.47  | 0.57  |
| BU361999 | NA | -2.26 | -2.69 | -3.77 | -1.03 | -0.69 | -0.53 | -0.25 | -0.18 |
| BU359204 | NA | -0.14 | -0.45 | 1.11  | 0.26  | 0.00  | 1.41  | 0.50  | 0.46  |

|          |    |       |       |       |       |       |       |       |       |
|----------|----|-------|-------|-------|-------|-------|-------|-------|-------|
| BU358684 | NA | -0.01 | -0.10 | -1.15 | -0.94 | 1.30  | -0.56 | -0.23 | -0.16 |
| BU357575 | NA | -0.69 | -0.09 | -1.18 | -0.78 | 1.07  | -0.75 | -0.37 | -0.05 |
| BU356610 | NA | -0.17 | 0.15  | 1.30  | 0.39  | -1.14 | 0.18  | 0.42  | 0.15  |
| BU356491 | NA | -0.79 | -0.89 | -1.23 | -2.01 | -0.75 | -1.20 | -0.49 | -0.47 |
| BU354682 | NA | -0.09 | 0.15  | -1.13 | -0.48 | -1.58 | -0.49 | -0.05 | 0.07  |
| BU354032 | NA | -1.45 | -1.83 | -3.56 | -0.59 | 0.34  | 0.16  | 0.00  | 0.28  |
| BU352310 | NA | -0.27 | -1.38 | -1.30 | -0.41 | 0.71  | -0.05 | 0.14  | 0.00  |
| BU351711 | NA | 0.70  | 0.59  | 1.28  | 0.66  | -0.88 | 1.06  | 0.91  | 0.53  |
| BU345906 | NA | -1.15 | -1.48 | -1.91 | -0.20 | 0.46  | -0.47 | 0.08  | -0.09 |
| BU345148 | NA | 1.04  | 0.95  | 1.66  | -0.48 | -1.82 | 0.85  | -0.12 | 0.22  |
| BU345054 | NA | -1.05 | -0.50 | -0.78 | 0.10  | -1.30 | -0.63 | -0.31 | -0.26 |
| BU344808 | NA | 0.34  | 0.24  | -0.21 | 1.13  | 1.71  | 0.70  | 0.75  | 0.40  |
| BU344287 | NA | 0.71  | 1.38  | 1.44  | 1.10  | -0.89 | 1.05  | 0.63  | 1.02  |
| BU343118 | NA | 1.70  | 1.90  | 1.52  | 1.01  | 0.58  | -0.22 | 0.30  | -0.02 |
| BU342723 | NA | -1.45 | -0.95 | -1.71 | -0.16 | 1.69  | -0.46 | -0.04 | -0.11 |
| BU341586 | NA | 1.07  | 0.16  | -0.72 | -0.90 | -1.60 | -0.35 | 0.20  | 0.14  |
| BU340968 | NA | -1.55 | -0.75 | -1.37 | -0.90 | 1.36  | -0.56 | -0.35 | -0.55 |
| BU338702 | NA | 0.08  | -0.73 | -1.57 | -1.55 | -0.92 | -0.36 | -0.25 | -0.64 |
| BU337526 | NA | 1.39  | 1.04  | 2.33  | -0.25 | -1.16 | 1.88  | 0.07  | 0.05  |
| BU336247 | NA | 0.22  | 1.90  | 1.01  | 0.67  | -0.32 | -0.03 | 0.32  | 0.25  |
| BU332405 | NA | -1.00 | -1.31 | -0.93 | -0.63 | 0.00  | -0.92 | -0.27 | -0.74 |
| BU327679 | NA | -1.11 | -1.55 | -3.18 | -1.09 | -0.44 | 0.01  | 0.24  | 0.07  |
| BU327258 | NA | 0.51  | 0.83  | 1.28  | 1.28  | 1.05  | 0.66  | 0.62  | 0.49  |
| BU327240 | NA | -0.70 | -1.33 | -1.43 | -1.31 | -0.14 | -0.66 | -0.74 | -0.52 |
| BU325617 | NA | 0.08  | -0.16 | 1.48  | -0.51 | -0.51 | 1.43  | -0.65 | -0.51 |
| BU325016 | NA | -1.30 | -1.79 | -2.66 | -0.37 | 1.44  | -0.56 | -0.04 | -0.19 |
| BU324904 | NA | -0.65 | -0.13 | -1.03 | -0.80 | 0.72  | -1.02 | -0.51 | -0.79 |
| BU324702 | NA | 1.57  | 1.25  | 0.82  | 0.51  | -0.10 | 0.35  | 0.88  | -0.38 |
| BU324545 | NA | -0.47 | -0.77 | -1.15 | -0.29 | 1.57  | -0.79 | 0.07  | -0.29 |
| BU324138 | NA | -1.69 | -1.91 | -2.44 | -0.51 | -0.18 | -0.58 | -0.39 | -0.42 |
| BU322889 | NA | -1.18 | -1.95 | -2.79 | -0.97 | 0.35  | -0.26 | 0.20  | -0.27 |
| BU322871 | NA | 0.10  | 0.25  | 1.54  | -0.25 | -0.31 | 1.10  | 0.11  | 0.45  |
| BU322603 | NA | 0.38  | 1.37  | 1.75  | 1.63  | 0.57  | -0.02 | 0.28  | 0.19  |
| BU320365 | NA | -1.00 | -0.54 | -1.13 | -0.60 | -0.73 | -0.75 | -0.50 | -0.61 |
| BU320344 | NA | 1.75  | 1.49  | 1.16  | 0.40  | 0.28  | -0.26 | -0.05 | 0.03  |
| BU319820 | NA | -1.71 | -2.33 | -2.83 | -1.24 | -1.21 | -1.34 | -0.73 | -0.90 |
| BU318540 | NA | -0.03 | 0.21  | 1.00  | 0.19  | -1.27 | 1.05  | 0.34  | 0.19  |
| BU317861 | NA | 1.78  | 1.83  | 1.74  | 0.71  | -0.44 | -0.10 | -0.17 | -0.32 |
| BU317813 | NA | 0.78  | 0.27  | 1.02  | -0.14 | -1.49 | 0.01  | -0.42 | -0.13 |
| BU315113 | NA | 0.13  | 1.07  | -0.54 | -0.10 | -1.97 | -0.19 | 0.22  | 0.56  |
| BU315034 | NA | 1.08  | 0.50  | 1.20  | 0.76  | 0.73  | 0.83  | 0.64  | 0.39  |
| BU313674 | NA | 2.94  | 1.71  | 1.36  | 0.15  | -1.42 | 0.61  | 0.89  | 0.49  |
| BU313370 | NA | -1.48 | -1.28 | -1.06 | -0.54 | -0.05 | -0.89 | -0.88 | -0.61 |
| BU312405 | NA | 0.47  | 0.45  | 1.85  | 0.27  | -0.71 | 1.27  | -0.12 | 0.30  |
| BU307317 | NA | 2.20  | 1.30  | 1.54  | 0.05  | -1.03 | 0.59  | 0.33  | 0.45  |
| BU307235 | NA | 0.60  | 0.77  | 0.92  | 0.31  | -2.25 | 1.06  | 0.41  | 0.70  |
| BU305256 | NA | 0.63  | 0.89  | 1.30  | 0.41  | -2.70 | 1.12  | 0.52  | 0.87  |
| BU304838 | NA | 3.42  | 1.26  | 1.65  | 0.26  | -0.15 | 0.71  | 1.12  | 0.53  |
| BU304351 | NA | 0.81  | 1.05  | 0.89  | 0.48  | -2.16 | 1.10  | 0.61  | 1.04  |
| BU303368 | NA | 0.08  | 1.60  | 1.33  | 0.58  | -0.41 | 1.14  | 0.53  | 1.40  |
| BU303106 | NA | -1.28 | -0.89 | -1.15 | -0.72 | 0.30  | -0.93 | -0.67 | -0.52 |
| BU302868 | NA | 0.73  | 0.85  | 1.02  | 0.64  | -2.18 | 1.18  | 0.34  | 0.92  |
| BU300403 | NA | -0.43 | -0.68 | -0.97 | -0.36 | 0.65  | -1.08 | -0.56 | -1.00 |
| BU299969 | NA | -0.36 | -1.05 | -0.98 | -0.98 | -1.14 | -0.90 | -0.52 | -0.46 |
| BU299028 | NA | -0.52 | -0.70 | -1.16 | -0.69 | 1.38  | 0.05  | 0.19  | -0.04 |
| BU297848 | NA | 1.30  | 0.89  | 1.50  | 0.30  | 0.11  | 1.08  | 0.30  | 0.51  |
| BU297794 | NA | -1.52 | -1.97 | -3.13 | 0.51  | 0.09  | -0.11 | 0.46  | -0.03 |
| BU297443 | NA | -1.27 | -1.84 | -2.45 | -0.28 | 0.27  | 0.08  | 0.11  | 0.10  |
| BU296787 | NA | -1.16 | -1.34 | -1.39 | -0.20 | -1.64 | 0.39  | 0.37  | -0.01 |
| BU296564 | NA | 3.78  | 0.85  | 1.04  | -0.11 | -1.50 | 0.57  | 0.62  | 0.86  |
| BU294724 | NA | 0.98  | 1.19  | 1.12  | 0.14  | -1.26 | 0.53  | 0.15  | 0.29  |
| BU294615 | NA | -1.03 | -0.97 | -1.65 | -0.87 | 1.28  | -0.92 | -0.20 | -0.52 |

|          |    |       |       |       |       |       |       |       |       |
|----------|----|-------|-------|-------|-------|-------|-------|-------|-------|
| BU293761 | NA | -0.87 | -1.13 | -1.03 | -0.55 | 0.17  | -0.27 | -0.05 | -0.46 |
| BU293603 | NA | 1.04  | 0.80  | 0.05  | -0.33 | 1.00  | -0.37 | -0.37 | -0.10 |
| BU293522 | NA | -0.09 | 0.84  | 1.00  | 1.26  | 1.11  | 0.44  | 0.37  | 0.70  |
| BU290714 | NA | -0.11 | -1.09 | -1.30 | 0.74  | -0.50 | 1.18  | 0.91  | 0.48  |
| BU290098 | NA | -0.93 | -1.03 | -2.22 | -0.33 | -0.51 | -0.17 | 0.11  | 0.21  |
| BU288202 | NA | 1.22  | 0.17  | 0.20  | 0.02  | 1.05  | -0.07 | 0.17  | -0.18 |
| BU285585 | NA | -0.54 | -0.13 | -1.88 | -1.33 | 0.29  | -0.78 | -0.47 | -0.75 |
| BU285155 | NA | -0.61 | -1.12 | -0.31 | -1.21 | -1.74 | 0.46  | -0.60 | -0.31 |
| BU285061 | NA | 0.41  | -1.20 | -1.73 | -2.01 | -0.47 | -0.73 | 0.09  | -0.02 |
| BU283685 | NA | 0.32  | -1.21 | -2.82 | -2.31 | -1.41 | -1.98 | -1.62 | -1.77 |
| BU282720 | NA | -1.63 | -1.51 | -2.73 | -0.53 | 0.62  | -0.72 | -0.27 | 0.05  |
| BU282623 | NA | -1.25 | -1.39 | -2.27 | -0.71 | 0.03  | -0.21 | -0.14 | -0.18 |
| BU282323 | NA | -0.29 | -1.47 | -3.01 | -1.00 | 0.49  | 0.03  | 0.34  | -0.14 |
| BU282192 | NA | -1.15 | -2.07 | -2.40 | -1.13 | 1.56  | -0.22 | 0.08  | -0.25 |
| BU281674 | NA | -0.49 | -1.04 | -1.04 | -0.96 | -0.78 | -0.16 | -0.32 | -0.35 |
| BU281141 | NA | -0.16 | 1.04  | 0.44  | 0.53  | -1.38 | 0.31  | -0.08 | 0.72  |
| BU279674 | NA | -0.63 | -1.00 | -1.71 | 0.36  | 0.66  | 0.27  | 0.61  | 0.25  |
| BU279420 | NA | 0.24  | -1.31 | -1.54 | -0.83 | -1.36 | -1.49 | -1.08 | -1.40 |
| BU279322 | NA | -2.06 | -2.41 | -2.86 | -0.36 | -1.00 | 0.27  | 0.31  | 0.51  |
| BU279107 | NA | -1.24 | 0.06  | -0.25 | 0.30  | -0.38 | -1.10 | -0.50 | -0.76 |
| BU278088 | NA | -1.59 | -1.35 | -1.55 | -0.50 | -0.07 | -0.30 | 0.00  | -0.35 |
| BU277421 | NA | -0.69 | -0.26 | -1.06 | -0.21 | 1.18  | -0.53 | -0.14 | -0.06 |
| BU277041 | NA | 0.57  | 0.68  | 1.09  | 0.56  | -1.87 | 1.55  | 0.24  | 0.83  |
| BU276555 | NA | -1.89 | -1.44 | -1.97 | -0.81 | 0.82  | -0.46 | -0.18 | -0.41 |
| BU276546 | NA | 2.35  | 0.75  | 2.34  | 0.91  | 1.15  | 0.53  | -0.17 | -0.04 |
| BU275081 | NA | 0.96  | 0.93  | 1.29  | 0.02  | -0.26 | 1.04  | 0.45  | 0.71  |
| BU273986 | NA | -0.75 | -0.74 | -1.63 | -0.76 | 1.04  | -0.53 | -0.11 | -0.24 |
| BU273461 | NA | -0.13 | -0.02 | -1.04 | -0.12 | 1.58  | 0.08  | 0.38  | 0.34  |
| BU270463 | NA | -2.37 | -2.98 | -3.53 | -0.05 | -0.79 | -0.57 | -0.32 | -0.56 |
| BU270277 | NA | -1.06 | -0.87 | -1.52 | -0.26 | -0.40 | -0.76 | -0.28 | -0.63 |
| BU270038 | NA | 0.35  | 0.73  | 1.30  | -0.14 | -1.99 | 1.29  | 0.58  | 0.77  |
| BU268323 | NA | 0.80  | 1.77  | 1.03  | 0.51  | -1.41 | 0.17  | 0.27  | 0.64  |
| BU267121 | NA | -0.78 | -0.92 | -1.45 | -0.52 | 1.08  | -0.49 | -0.11 | -0.31 |
| BU267108 | NA | 1.07  | 1.80  | 0.47  | -0.34 | -2.19 | -0.32 | -0.55 | 0.20  |
| BU266497 | NA | -1.53 | -1.26 | -1.85 | 0.12  | -0.66 | -0.55 | -0.43 | -0.33 |
| BU266287 | NA | 1.03  | 0.04  | -0.34 | -0.37 | -1.10 | 0.20  | 0.11  | 0.30  |
| BU266018 | NA | 0.06  | -0.22 | 1.82  | -0.27 | -0.66 | 1.11  | -0.46 | -0.08 |
| BU265433 | NA | -1.11 | -0.70 | -1.31 | 0.58  | 0.40  | -0.57 | -0.32 | -0.50 |
| BU263201 | NA | 0.26  | -0.26 | -1.21 | -0.19 | 1.19  | -0.48 | 0.01  | -0.12 |
| BU261661 | NA | 1.82  | 1.01  | 0.64  | 0.01  | 0.40  | -0.47 | -0.24 | -0.40 |
| BU260000 | NA | -2.07 | -3.01 | -4.45 | -0.75 | -0.67 | -0.43 | -0.30 | -0.24 |
| BU259816 | NA | -1.00 | -1.12 | -0.78 | -0.38 | 0.00  | -0.68 | -0.43 | -0.66 |
| BU259114 | NA | -1.13 | -1.28 | -0.97 | -0.74 | -0.59 | 0.24  | 0.10  | -0.17 |
| BU258931 | NA | -0.31 | -0.20 | -1.00 | 0.18  | 1.41  | 0.01  | 0.12  | 0.27  |
| BU256299 | NA | -0.01 | -0.53 | -1.47 | -1.10 | -0.37 | -0.67 | -0.43 | -0.68 |
| BU255977 | NA | -1.20 | -0.68 | -1.08 | -0.75 | 1.48  | -0.39 | -0.15 | -0.46 |
| BU255609 | NA | -2.66 | -3.18 | -3.49 | -1.41 | 0.30  | -0.81 | 0.36  | -1.54 |
| BU255221 | NA | 1.30  | 0.61  | 1.03  | 0.62  | -1.45 | -0.88 | -0.33 | 0.59  |
| BU255005 | NA | -0.58 | -1.00 | -1.06 | -0.92 | -0.35 | -0.63 | -0.77 | -0.94 |
| BU254619 | NA | -1.77 | -0.71 | -1.80 | -0.60 | -0.16 | -1.09 | -0.65 | -0.58 |
| BU254557 | NA | 0.62  | 0.64  | 1.51  | 0.21  | -0.65 | 1.84  | 0.39  | 0.37  |
| BU254408 | NA | -0.28 | 1.06  | 0.98  | 0.18  | 1.07  | -0.38 | -0.23 | -0.35 |
| BU254307 | NA | 1.41  | 1.00  | 1.15  | 0.19  | 0.57  | 1.01  | 0.27  | 0.36  |
| BU254286 | NA | 1.09  | 1.64  | 1.08  | 0.15  | 0.37  | 0.12  | -0.46 | -0.04 |
| BU249125 | NA | 0.41  | 0.50  | 1.25  | 0.31  | 0.14  | 1.45  | 0.09  | 0.70  |
| BU248930 | NA | 3.20  | 1.59  | 1.10  | 0.76  | 1.20  | 0.82  | 1.07  | 0.75  |
| BU247385 | NA | -1.20 | -1.47 | -1.08 | -0.23 | 0.22  | -0.75 | -0.39 | -0.85 |
| BU247375 | NA | -1.41 | -1.28 | -3.11 | -2.14 | 1.01  | -0.83 | -1.46 | -1.17 |
| BU247311 | NA | 0.11  | 0.10  | 1.39  | -0.29 | -0.09 | 1.86  | -0.04 | -0.02 |
| BU247129 | NA | 1.11  | 1.03  | 1.45  | 0.03  | 0.20  | -0.17 | -0.47 | -0.07 |
| BU246414 | NA | 2.13  | 1.10  | 0.97  | 0.05  | -0.72 | -0.31 | -0.54 | -0.48 |
| BU245733 | NA | 0.81  | 0.24  | 0.92  | 1.03  | 1.11  | -0.15 | 0.23  | 0.58  |

|          |    |       |       |       |       |       |       |       |       |
|----------|----|-------|-------|-------|-------|-------|-------|-------|-------|
| BU245333 | NA | -0.07 | -0.77 | -1.44 | -0.80 | -0.65 | 1.02  | 0.63  | 1.49  |
| BU243650 | NA | -1.55 | -1.24 | -0.98 | -0.41 | 0.91  | -0.65 | -0.43 | -0.61 |
| BU241967 | NA | 0.58  | 1.39  | 0.31  | 0.15  | -1.25 | -0.17 | 0.14  | 0.27  |
| BU240849 | NA | 0.64  | 1.33  | 1.60  | 0.52  | -0.24 | -0.47 | 0.21  | -0.19 |
| BU240045 | NA | -1.27 | -1.65 | -1.99 | -0.99 | 0.24  | -0.47 | 0.24  | -0.34 |
| BU239716 | NA | -1.01 | -0.90 | -1.43 | -0.57 | -0.17 | -0.17 | 0.31  | -0.20 |
| BU239156 | NA | 1.87  | 0.66  | 1.83  | 0.28  | -0.44 | -0.18 | -0.52 | -0.51 |
| BU237820 | NA | -0.20 | 0.62  | 1.08  | 1.38  | 1.05  | -0.05 | 0.11  | -0.02 |
| BU237446 | NA | -1.08 | -0.77 | -1.06 | 0.88  | -0.38 | -0.38 | 0.00  | -0.01 |
| BU237188 | NA | -1.03 | 0.11  | -0.03 | 0.51  | -1.61 | 0.12  | -0.14 | 0.02  |
| BU237087 | NA | -0.48 | -0.54 | -1.43 | -0.78 | 1.21  | -0.51 | -0.30 | -0.45 |
| BU236262 | NA | -0.78 | -1.79 | -1.90 | -0.42 | 0.23  | -0.85 | -0.28 | -0.30 |
| BU235128 | NA | -1.50 | -2.74 | -2.90 | 0.07  | 0.20  | 0.09  | 0.37  | 0.21  |
| BU234983 | NA | 1.06  | 0.59  | 1.67  | 0.38  | -0.28 | 0.67  | 0.17  | 0.27  |
| BU234575 | NA | -1.01 | -0.52 | -1.00 | -0.62 | -0.21 | -0.75 | -0.53 | -0.32 |
| BU234397 | NA | -0.96 | -1.50 | -1.51 | -0.95 | 0.16  | -0.65 | -0.44 | -0.63 |
| BU234276 | NA | 0.27  | 1.35  | 0.69  | 0.78  | 1.40  | 0.17  | 0.07  | 0.53  |
| BU234048 | NA | -0.66 | -1.56 | -1.79 | -1.35 | -1.02 | -1.22 | -0.76 | -1.28 |
| BU233631 | NA | 0.67  | 0.39  | 1.19  | -0.05 | -0.47 | 1.28  | 0.07  | 0.60  |
| BU233467 | NA | 0.49  | 0.38  | 1.16  | 0.29  | -0.11 | 1.01  | 0.32  | 0.17  |
| BU233447 | NA | -0.48 | -1.28 | -1.09 | -1.29 | -0.02 | -0.50 | -0.49 | -0.61 |
| BU232900 | NA | -1.39 | -2.61 | -3.37 | -0.54 | 1.44  | 0.42  | 0.26  | 0.33  |
| BU232437 | NA | 0.07  | -0.08 | 0.66  | 1.00  | 1.97  | -0.02 | 0.22  | 0.07  |
| BU232429 | NA | -0.58 | -0.06 | -0.67 | -0.28 | 1.16  | -1.02 | -0.39 | -0.51 |
| BU232159 | NA | 0.20  | 0.17  | 1.67  | 0.08  | 0.56  | 1.38  | 0.13  | -0.10 |
| BU231877 | NA | -0.35 | -1.10 | -1.11 | 0.07  | 0.42  | -0.34 | 0.03  | 0.00  |
| BU231475 | NA | 1.17  | 1.16  | 0.61  | -0.18 | -0.81 | 0.17  | -0.40 | 0.29  |
| BU231385 | NA | -0.88 | -1.40 | -1.36 | -0.34 | 0.30  | -0.26 | 0.07  | -0.61 |
| BU231026 | NA | -1.12 | -1.04 | -1.89 | 0.01  | -0.29 | -0.10 | 0.30  | 0.04  |
| BU230760 | NA | -0.25 | -0.57 | -1.67 | -1.08 | -0.01 | -0.57 | -0.36 | -0.53 |
| BU228583 | NA | 1.36  | -0.35 | -0.12 | -1.11 | -1.10 | -0.41 | -0.80 | -0.76 |
| BU228386 | NA | -0.98 | -1.09 | -2.36 | -0.09 | 0.46  | -0.59 | -0.02 | -0.14 |
| BU227980 | NA | 0.51  | -0.66 | -1.36 | -1.53 | 0.42  | -1.01 | -0.80 | -0.26 |
| BU227807 | NA | -0.99 | -1.66 | -1.24 | -0.75 | 0.30  | -0.16 | -0.19 | -0.27 |
| BU227513 | NA | -0.75 | -1.35 | -1.71 | -1.11 | -0.63 | -0.44 | -0.24 | -0.28 |
| BU227150 | NA | -0.18 | -0.66 | -1.22 | -0.41 | -0.12 | -0.93 | -0.91 | -1.02 |
| BU225487 | NA | 0.02  | 0.21  | -1.02 | -0.17 | 1.44  | -0.24 | -0.09 | 0.30  |
| BU223866 | NA | -1.30 | -1.18 | -1.55 | -0.86 | -0.81 | -0.96 | -0.77 | -0.80 |
| BU222526 | NA | -0.09 | 0.28  | 1.08  | 0.14  | -1.26 | 1.32  | 0.66  | 0.36  |
| BU222040 | NA | -0.83 | -0.99 | -1.81 | 0.05  | 1.22  | -0.29 | 0.09  | -0.52 |
| BU221851 | NA | 1.49  | 1.18  | 1.56  | 0.34  | 0.30  | 0.51  | 0.07  | 0.03  |
| BU220598 | NA | -0.94 | -1.63 | -2.58 | -2.95 | -0.40 | -1.73 | -1.27 | -1.11 |
| BU220225 | NA | 0.25  | 0.04  | 0.75  | 0.12  | -3.29 | 1.63  | 0.68  | 0.90  |
| BU218966 | NA | -1.15 | -2.06 | -2.17 | 0.44  | 0.40  | 0.66  | 0.39  | 0.05  |
| BU218785 | NA | 0.94  | 1.67  | 1.74  | 0.68  | -0.20 | 0.91  | 0.40  | 0.44  |
| BU218404 | NA | 4.43  | 3.91  | 3.55  | 2.27  | 1.29  | 0.97  | 0.81  | 0.99  |
| BU218046 | NA | 0.48  | 1.03  | 0.93  | 0.57  | 1.17  | -0.19 | -0.14 | 0.00  |
| BU217508 | NA | -0.92 | -1.12 | -1.71 | -0.66 | 0.67  | -0.14 | 0.32  | 0.35  |
| BU217026 | NA | -1.04 | -0.60 | -0.62 | -0.27 | -0.19 | -0.46 | -1.03 | -0.34 |
| BU216756 | NA | -0.87 | -1.05 | -1.18 | 0.18  | -2.52 | 0.81  | 0.05  | 1.09  |
| BU216588 | NA | 1.18  | 0.49  | 0.59  | -0.08 | -0.15 | 1.73  | 0.54  | 1.03  |
| BU215723 | NA | -0.33 | -1.61 | -1.53 | 0.32  | -0.01 | -0.01 | -0.24 | -0.35 |
| BU215364 | NA | -0.37 | -0.50 | -0.74 | -0.86 | 0.12  | -1.02 | -1.06 | -0.96 |
| BU214576 | NA | -1.30 | -1.24 | -1.60 | 0.04  | -0.44 | 0.10  | 0.07  | 0.65  |
| BU214574 | NA | -0.86 | -1.06 | -1.79 | -1.64 | -0.22 | -0.68 | -0.22 | -0.18 |
| BU214216 | NA | -0.86 | -1.41 | -1.85 | -0.60 | 0.51  | -0.37 | 0.10  | 0.08  |
| BU212868 | NA | -1.24 | -1.00 | -0.70 | -0.41 | 0.57  | -0.47 | -0.33 | -0.41 |
| BU212505 | NA | -0.44 | -1.19 | -1.43 | 0.91  | -0.86 | 0.55  | 0.28  | 0.31  |
| BU212040 | NA | 0.04  | 0.20  | 0.69  | -0.59 | -1.37 | 1.36  | -0.35 | 0.26  |
| BU210531 | NA | -0.13 | -0.72 | 1.37  | -0.29 | -0.43 | 1.44  | -0.30 | -0.24 |
| BU210050 | NA | -0.71 | -0.95 | -1.75 | -0.36 | 1.33  | -0.65 | -0.12 | -0.42 |
| BU210013 | NA | 0.23  | 0.12  | 1.10  | -0.22 | -0.25 | 1.70  | -0.59 | 0.20  |

|          |    |       |       |       |       |       |       |       |       |
|----------|----|-------|-------|-------|-------|-------|-------|-------|-------|
| BU209526 | NA | -0.65 | -1.17 | -0.59 | -0.88 | -2.48 | 0.90  | 0.61  | 0.55  |
| BU208884 | NA | -1.09 | -0.39 | -1.38 | -0.41 | 0.45  | -0.66 | -0.38 | -0.53 |
| BU208183 | NA | -0.72 | -1.10 | -0.95 | 0.46  | -1.01 | 0.07  | 0.47  | 0.26  |
| BU207700 | NA | -1.35 | -0.76 | -1.86 | 0.31  | -0.77 | 0.00  | 0.08  | -0.01 |
| BU207392 | NA | -1.66 | -1.64 | -1.54 | -0.65 | -0.29 | -0.85 | -0.53 | -1.08 |
| BU206232 | NA | -0.60 | -1.49 | -1.61 | -1.40 | 0.41  | -0.56 | -0.54 | -0.66 |
| BU206171 | NA | -0.63 | -0.77 | -1.75 | -0.63 | 0.19  | -1.05 | -0.54 | -0.30 |
| BU203636 | NA | 0.13  | 1.13  | 1.04  | 0.32  | -0.52 | -0.08 | 0.12  | 0.26  |
| BU203438 | NA | -1.09 | -1.13 | -0.86 | -0.89 | -0.01 | -0.76 | -0.74 | -0.66 |
| BU203290 | NA | 1.59  | 0.30  | 1.35  | -1.02 | -0.85 | -0.18 | -0.87 | -0.79 |
| BU203257 | NA | 1.59  | 1.59  | 1.20  | 0.95  | 0.10  | -0.33 | -0.16 | 0.04  |
| BU202939 | NA | 1.22  | 0.93  | 0.49  | 0.51  | -1.06 | 0.39  | -0.18 | 0.18  |
| BU202830 | NA | -0.91 | -0.93 | -1.57 | -1.62 | 0.35  | -0.92 | -0.66 | -0.32 |
| BU202681 | NA | -1.25 | -1.77 | -2.19 | 0.77  | -2.07 | 0.64  | 0.62  | 0.45  |
| BU201493 | NA | -1.20 | -1.76 | -2.80 | -0.61 | -0.04 | -0.16 | 0.20  | 0.10  |
| BU200559 | NA | 1.64  | 0.26  | -0.24 | -0.47 | 1.32  | -0.54 | -0.33 | -0.41 |
| BU200484 | NA | 0.41  | 0.90  | 1.21  | 0.25  | -1.40 | 1.51  | -0.34 | 0.44  |
| BU144636 | NA | 1.23  | 1.19  | 0.99  | 0.82  | -0.09 | 0.49  | 0.50  | 0.62  |
| BU144269 | NA | -0.51 | -1.35 | -1.12 | -3.87 | -0.19 | -0.67 | -0.21 | -0.49 |
| BU144209 | NA | 0.12  | 0.05  | 1.04  | 0.40  | 0.49  | 1.34  | 0.47  | 0.32  |
| BU143690 | NA | 1.72  | 1.08  | 0.78  | 0.94  | 1.04  | 0.40  | 0.99  | 0.54  |
| BU142164 | NA | -0.79 | -1.56 | -2.12 | -0.34 | -0.14 | -0.12 | 0.38  | -0.05 |
| BU141883 | NA | -0.17 | -1.09 | -1.64 | -1.37 | -1.48 | -0.52 | -0.21 | -0.16 |
| BU140360 | NA | -0.24 | -0.72 | -0.51 | -1.30 | -0.38 | -0.54 | -0.87 | -1.23 |
| BU139987 | NA | -1.51 | -1.38 | -1.86 | -1.03 | -0.29 | -0.58 | -0.60 | -0.36 |
| BU136253 | NA | -0.96 | -0.97 | -4.08 | -3.94 | -3.14 | -0.18 | -0.22 | -0.97 |
| BU136048 | NA | 0.49  | 0.53  | 1.46  | 0.86  | 1.14  | 0.19  | 0.04  | 0.13  |
| BU134935 | NA | 0.14  | -1.99 | -0.74 | -1.25 | -1.31 | 0.95  | -0.12 | -0.37 |
| BU133795 | NA | -0.22 | -0.60 | -1.32 | -1.35 | -0.91 | -0.51 | -0.33 | -0.54 |
| BU133543 | NA | -0.77 | -2.10 | -1.62 | -0.15 | -0.11 | 0.23  | 0.25  | -0.35 |
| BU132298 | NA | -0.65 | -0.88 | -1.47 | -1.19 | -1.29 | -0.51 | -0.25 | -0.20 |
| BU131496 | NA | -1.12 | -0.76 | -1.44 | -1.72 | -0.41 | -0.74 | -0.52 | -0.40 |
| BU130920 | NA | -0.30 | -0.09 | -1.98 | -1.02 | -0.58 | -0.70 | -0.14 | -0.33 |
| BU127713 | NA | -1.37 | -1.15 | -2.17 | -0.40 | 0.57  | -0.28 | 0.15  | 0.15  |
| BU126644 | NA | -0.51 | -1.02 | -1.01 | -0.31 | 1.23  | -0.27 | -0.14 | -0.17 |
| BU126292 | NA | -1.25 | -1.24 | -1.52 | -1.12 | -0.51 | -0.72 | -0.44 | -0.43 |
| BU125970 | NA | -0.40 | -0.64 | -1.35 | -1.13 | -0.07 | -0.61 | -0.54 | -0.49 |
| BU125373 | NA | -0.81 | -0.25 | -1.36 | -0.93 | -0.14 | -1.17 | -0.56 | -0.68 |
| BU124642 | NA | 0.20  | -0.72 | -1.09 | -0.08 | -1.17 | -1.00 | -0.60 | -0.74 |
| BU124178 | NA | 3.67  | 2.32  | 2.21  | 0.83  | -0.57 | 0.45  | 0.76  | -0.06 |
| BU123914 | NA | 1.91  | 0.68  | 0.46  | -0.70 | 0.00  | -0.92 | -0.21 | -1.45 |
| BU123282 | NA | -0.65 | -0.53 | -1.94 | -1.12 | -0.01 | -0.26 | -0.28 | -0.32 |
| BU122954 | NA | 0.04  | -1.09 | -1.21 | -0.44 | -1.19 | -1.27 | -0.80 | -0.99 |
| BU122840 | NA | 2.74  | 1.28  | 1.73  | 0.22  | -0.04 | 0.08  | 0.04  | -0.03 |
| BU119948 | NA | -1.09 | -1.15 | -1.54 | 0.20  | -1.78 | -0.02 | -0.01 | 0.40  |
| BU119271 | NA | -1.43 | -2.70 | -3.10 | -0.79 | 0.75  | -0.05 | -0.19 | -0.32 |
| BU118513 | NA | 1.29  | 1.15  | 1.29  | -0.04 | -1.75 | 1.25  | 0.26  | 0.38  |
| BU117225 | NA | -0.61 | -0.06 | -2.80 | -2.78 | 0.85  | 0.00  | -1.79 | -1.13 |
| BU116646 | NA | -1.68 | -1.24 | -1.13 | -0.35 | -0.43 | -0.68 | -0.44 | -0.54 |
| BU116523 | NA | 0.05  | -0.89 | -1.61 | -1.73 | -0.38 | -0.49 | -0.22 | -0.19 |
| BU116242 | NA | -1.40 | -2.31 | -1.42 | 0.26  | -0.93 | 0.03  | 0.30  | -0.20 |
| BU116194 | NA | -1.09 | 0.11  | -1.36 | -0.58 | 0.08  | -0.79 | -0.39 | -0.43 |
| BU115841 | NA | -0.44 | -1.71 | -2.97 | -0.34 | -1.05 | -0.28 | 0.15  | 0.04  |
| BU115655 | NA | -1.17 | -1.10 | -1.92 | -0.52 | 0.56  | -0.44 | -0.04 | -0.07 |
| BU115445 | NA | -1.07 | -0.98 | -1.15 | -0.74 | -0.29 | -0.60 | -0.36 | -0.38 |
| BU115430 | NA | -0.98 | -1.22 | -1.33 | -0.78 | -0.86 | -1.23 | -0.88 | -1.10 |
| BU115352 | NA | -0.69 | -1.08 | -1.66 | -0.19 | 0.13  | 0.04  | 0.31  | -0.17 |
| BU114775 | NA | -1.17 | -0.85 | -1.40 | -1.20 | 0.32  | -0.89 | -0.81 | -0.70 |
| BU114550 | NA | 0.82  | 1.55  | 0.93  | 1.34  | 0.33  | 0.36  | -0.15 | -0.05 |
| BU112025 | NA | -0.77 | -1.25 | -2.25 | -0.13 | -0.20 | 0.42  | 0.48  | 0.32  |
| BU111965 | NA | -0.68 | -1.96 | -2.82 | -0.61 | -1.08 | -0.12 | 0.25  | 0.34  |
| BU111796 | NA | -1.12 | -0.50 | -1.71 | -0.27 | 0.62  | -0.65 | -0.28 | -0.05 |

|          |    |       |       |       |       |       |       |       |       |
|----------|----|-------|-------|-------|-------|-------|-------|-------|-------|
| BU111386 | NA | -1.15 | -0.71 | -1.02 | -0.13 | 0.13  | -0.03 | -0.05 | 0.02  |
| BU109690 | NA | -0.31 | -0.79 | -1.14 | -1.00 | -0.28 | -0.28 | -0.08 | -0.04 |
| BU108466 | NA | -1.14 | -1.01 | -1.60 | -0.58 | 0.14  | -0.90 | -0.82 | -0.69 |
| BU108312 | NA | 0.09  | 1.08  | 0.57  | 0.35  | 1.44  | 0.06  | 0.03  | 0.19  |
| BU105968 | NA | -0.15 | -0.07 | -1.00 | -1.27 | -0.05 | -0.86 | -0.46 | -0.47 |
| BU105760 | NA | 0.49  | 0.47  | 0.43  | -0.36 | -2.57 | 1.06  | -0.20 | 0.13  |
| BU105511 | NA | 1.25  | 0.53  | 0.47  | -0.32 | -2.37 | 0.46  | -0.29 | 0.00  |
| BU105428 | NA | -1.12 | -1.05 | -1.56 | -1.24 | -0.13 | -0.49 | -0.22 | -0.55 |
| BQ293324 | NA | 1.34  | 0.78  | 1.63  | -0.04 | -2.14 | 1.42  | 0.35  | 0.97  |
| BQ293322 | NA | -1.19 | -0.88 | 0.56  | 1.05  | -1.62 | 0.28  | 0.42  | 0.19  |
| BM293875 | NA | 1.61  | 1.30  | 1.46  | 0.31  | 0.23  | 0.03  | -0.35 | -0.40 |
| BM293864 | NA | 1.96  | 1.32  | 1.60  | 0.47  | 0.51  | 0.06  | -0.26 | -0.16 |
| BG625733 | NA | -0.92 | -0.77 | -1.12 | -0.43 | 1.10  | 0.05  | 0.66  | 0.03  |
| BG625632 | NA | 1.22  | 1.06  | 0.90  | 0.23  | 0.70  | -0.32 | -0.17 | -0.18 |
| BG625507 | NA | 2.23  | 0.98  | 3.79  | 2.37  | 1.60  | -0.05 | 0.04  | -0.06 |
| BG625383 | NA | -1.08 | -1.31 | -1.70 | -0.66 | -0.66 | -0.72 | -0.27 | -0.46 |
| BG625333 | NA | -2.03 | -1.69 | -2.25 | -1.09 | -1.21 | -1.34 | -0.68 | -0.64 |
| BG625314 | NA | -1.04 | -1.27 | -1.69 | -0.68 | 0.89  | -0.49 | -0.31 | -0.47 |
| BG625165 | NA | 1.30  | 1.09  | 1.33  | 0.90  | -0.43 | 0.66  | 0.92  | 0.88  |
| BG625127 | NA | 1.77  | 1.66  | 0.86  | 0.88  | 0.84  | 0.11  | 0.46  | 0.51  |
| BG625073 | NA | 1.39  | 0.66  | 1.16  | 0.14  | 0.86  | 0.18  | 0.20  | 0.08  |
| BG625040 | NA | -0.60 | -0.49 | -0.50 | 0.27  | -0.15 | -1.16 | -0.43 | -1.19 |
| BG625020 | NA | -0.85 | -1.47 | -1.18 | -0.35 | 1.08  | -0.47 | 0.12  | -0.05 |
| BF724030 | NA | 1.10  | 1.07  | 0.76  | 0.75  | -0.26 | 0.48  | 0.54  | 0.67  |
| BF724025 | NA | -1.28 | -2.33 | -2.45 | -1.04 | -1.00 | -1.06 | -0.35 | -0.72 |
| BF724023 | NA | 0.62  | 0.19  | 1.13  | -0.03 | -1.04 | 0.85  | 0.29  | 0.40  |
| BF724016 | NA | 0.37  | 0.29  | 1.24  | -0.06 | -1.61 | 0.88  | 0.13  | 0.23  |
| BF724008 | NA | 1.50  | 0.94  | 1.14  | 0.37  | 0.00  | 0.77  | 0.44  | 0.23  |
| BF723990 | NA | 2.34  | 1.99  | 2.26  | 1.41  | -0.74 | 0.27  | 0.42  | 0.73  |
| BF723979 | NA | -1.43 | -2.20 | -2.51 | -1.14 | -1.02 | -1.05 | -0.60 | -0.76 |
| BF723933 | NA | -0.05 | 1.22  | -0.26 | 0.33  | -1.62 | -0.06 | -0.13 | 0.68  |
| BF723932 | NA | 0.47  | 1.53  | 1.62  | 0.78  | -0.71 | 1.58  | 0.60  | 1.03  |
| BF723929 | NA | 0.08  | 0.40  | 1.34  | 0.12  | -1.01 | 0.88  | 0.24  | 0.31  |
| BF723868 | NA | -1.06 | -0.88 | 0.82  | 0.84  | -1.29 | 0.25  | 0.39  | 0.00  |
| BF723855 | NA | 1.59  | 1.09  | 1.13  | 0.51  | -0.05 | 0.66  | 0.40  | 0.22  |
| BF723849 | NA | 0.31  | 0.54  | 1.13  | 1.09  | 0.88  | 0.17  | 0.52  | 0.24  |
| BF723848 | NA | -0.90 | -0.25 | 1.44  | 0.38  | -1.83 | 0.82  | 0.16  | 0.20  |
| BF723786 | NA | -0.64 | -0.58 | -1.05 | -0.10 | 1.72  | -0.40 | -0.72 | -0.42 |
| BF723785 | NA | -0.22 | 1.27  | 0.76  | 0.94  | -1.14 | 0.37  | 0.42  | 0.57  |
| BF723712 | NA | -1.09 | -0.93 | 0.92  | 0.72  | -1.75 | 0.18  | 0.33  | 0.03  |
| BE140020 | NA | 0.22  | 0.23  | -1.02 | 0.34  | 1.59  | -0.41 | 0.08  | 0.37  |
| BE139980 | NA | 0.26  | 1.52  | 1.90  | 1.64  | -0.87 | 1.86  | 0.28  | 1.29  |
| BE139925 | NA | 1.06  | 0.30  | 1.03  | -0.11 | -1.87 | 0.87  | 0.24  | 0.49  |
| BE139880 | NA | 0.57  | 1.48  | 1.76  | 0.83  | -0.69 | 1.68  | 0.57  | 1.31  |
| BE139832 | NA | 0.43  | 1.00  | 2.00  | 0.99  | -0.16 | 2.23  | 0.58  | 1.29  |
| BE139810 | NA | 0.32  | 1.45  | 1.86  | 1.33  | 1.03  | 0.51  | 0.24  | 0.52  |
| BE139798 | NA | 1.07  | 1.73  | 0.18  | 0.17  | 0.15  | -0.10 | -0.05 | 0.24  |
| BE139789 | NA | 0.68  | 0.63  | 0.76  | 0.26  | -1.52 | 1.05  | 0.77  | 0.66  |
| AW773286 | NA | 1.47  | 1.03  | 1.37  | 0.24  | -1.41 | 1.20  | 0.30  | 0.43  |
| AW773262 | NA | 0.04  | 1.43  | -1.62 | -0.18 | 0.84  | -0.32 | 0.13  | 0.49  |
| AW773230 | NA | 0.78  | 1.70  | 1.04  | 0.58  | -0.74 | 0.13  | -0.10 | -0.08 |
| AW773219 | NA | 1.14  | 1.21  | 0.77  | 0.78  | -0.24 | 0.46  | 0.67  | 0.54  |
| AW773211 | NA | -0.13 | 1.04  | 1.07  | 0.50  | 0.48  | 0.05  | 0.00  | -0.05 |
| AW773210 | NA | 1.28  | 1.48  | 0.90  | -0.38 | -0.39 | -0.33 | -0.31 | 0.14  |
| AW773183 | NA | -1.01 | -0.54 | -1.16 | -0.41 | -0.12 | -0.87 | -0.48 | -0.61 |
| AW773178 | NA | 0.04  | 1.28  | -1.23 | -0.10 | 0.77  | -0.61 | -0.14 | 0.26  |
| AW773167 | NA | -0.75 | -0.81 | -1.14 | -0.19 | 1.69  | -0.36 | -0.63 | -0.29 |
| AW773162 | NA | 0.23  | 1.11  | 0.45  | 0.57  | -2.23 | 0.15  | 0.04  | 0.63  |
| AW773097 | NA | 0.35  | 0.93  | 1.39  | 0.50  | -1.17 | 1.12  | 0.26  | 0.60  |
| AW061437 | NA | 1.22  | 1.39  | 1.35  | 0.90  | -0.01 | -0.05 | 0.07  | 0.11  |
| AJ454898 | NA | 0.64  | 0.62  | 1.19  | 0.51  | 1.12  | 0.58  | 0.68  | 0.47  |
| AJ452300 | NA | 0.28  | 1.04  | 1.68  | 1.33  | 1.90  | 0.59  | 0.34  | 1.31  |

|          |                                                               |       |       |       |       |       |       |       |       |
|----------|---------------------------------------------------------------|-------|-------|-------|-------|-------|-------|-------|-------|
| AJ451853 | NA                                                            | -0.63 | 2.08  | 1.74  | 1.57  | 0.38  | -0.32 | -0.26 | -0.16 |
| AJ448447 | NA                                                            | 0.85  | 1.43  | 1.77  | 0.46  | 0.11  | 0.10  | 0.05  | -0.18 |
| AJ447828 | NA                                                            | -0.49 | 1.65  | 1.60  | 1.45  | 1.19  | -0.05 | 0.05  | -0.08 |
| AJ447587 | NA                                                            | 1.15  | 0.64  | 1.12  | 0.81  | 0.31  | 0.17  | 0.39  | 0.18  |
| AJ447025 | NA                                                            | -0.31 | -0.48 | -1.34 | -0.74 | 0.18  | -1.35 | -0.87 | -0.87 |
| AJ445396 | NA                                                            | 0.51  | 1.36  | 2.00  | 1.00  | 0.49  | 0.53  | 0.23  | 0.25  |
| AJ399450 | NA                                                            | -1.25 | -1.46 | -1.89 | -0.55 | 1.02  | -1.02 | -0.24 | -0.96 |
| AJ393993 | NA                                                            | 1.83  | 1.71  | 1.64  | 0.91  | 1.01  | 0.29  | 0.47  | 0.54  |
| AI981949 | NA                                                            | -1.36 | -1.51 | -1.95 | -0.44 | -1.47 | -0.32 | -0.18 | -0.26 |
| AI981680 | NA                                                            | 1.40  | 0.89  | 2.00  | 0.93  | 1.04  | -0.14 | -0.13 | -0.12 |
| AI981096 | NA                                                            | 2.36  | 1.00  | 0.34  | -0.66 | -1.20 | 0.10  | -0.23 | -0.19 |
| AI980751 | NA                                                            | 1.47  | 1.67  | 3.07  | 1.05  | 1.04  | 0.33  | 0.31  | 0.39  |
| BU455737 | N33 protein                                                   | -0.65 | -1.27 | -1.60 | -0.95 | 0.41  | -0.22 | -0.17 | -0.07 |
| BU285807 | Mycbp associated protein                                      | -1.12 | -1.51 | -2.35 | -0.04 | -0.22 | -0.61 | 0.00  | -0.12 |
| BU387676 | Mycbp associated protein                                      | -1.22 | -1.05 | -1.96 | -0.06 | -0.31 | -0.26 | 0.06  | 0.03  |
| BU241986 | MTSP4 protease                                                | -0.32 | -0.23 | -1.34 | -0.01 | 1.30  | -0.09 | 0.37  | -0.08 |
| BG625683 | Msx2 interacting nuclear target protein                       | -0.78 | -0.54 | -1.02 | -0.36 | -1.11 | -0.87 | -0.36 | -0.27 |
| BU245190 | modulator recognition factor 2                                | -0.33 | -1.17 | -1.90 | -1.31 | -1.89 | -1.17 | -0.69 | -0.83 |
| BU241130 | mKIAA1403 protein                                             | -0.55 | -0.31 | -1.23 | -1.24 | 0.04  | -0.87 | -0.58 | -0.61 |
| BU213948 | mKIAA0998 protein                                             | -1.65 | -1.79 | -2.22 | -0.60 | 0.09  | -0.72 | -0.61 | -0.57 |
| BU256643 | mKIAA0665 protein                                             | -0.67 | -0.75 | -1.33 | -0.67 | -1.06 | -0.67 | -0.67 | -0.85 |
| BU465154 | mKIAA0626 protein                                             | -0.23 | -0.41 | -1.67 | -1.05 | 0.54  | -0.39 | -0.08 | -0.06 |
| BU277728 | mKIAA0592 protein                                             | 0.59  | 1.14  | 1.41  | 0.58  | -0.07 | 1.74  | 0.42  | 0.85  |
| BU224514 | mKIAA0560 protein                                             | -1.14 | -1.14 | -1.00 | -0.51 | 0.10  | 0.67  | -1.50 | 0.95  |
| BU134584 | mKIAA0483 protein                                             | -0.84 | -0.33 | -1.12 | -0.26 | -1.15 | -0.32 | -0.21 | -0.22 |
| BU122491 | mKIAA0308 protein                                             | 1.40  | 1.22  | 0.44  | 0.22  | -0.71 | 0.12  | 0.15  | 0.38  |
| BU472330 | mitotic kinesin-related protein                               | -0.33 | 0.57  | 1.23  | 1.16  | -0.42 | 0.89  | 0.41  | 0.05  |
| BU214018 | mitochondrial transmembrane GTPase FZO1B                      | 0.51  | 0.20  | 1.08  | 0.46  | -0.08 | 1.33  | 0.30  | 0.11  |
| BU133941 | Mitochondrial import inner membrane translocase subunit TIM23 | -0.95 | -1.10 | -1.20 | -0.08 | -0.28 | 0.15  | 0.47  | 0.03  |
| BU279110 | Mitochondrial import inner membrane translocase subunit TIM10 | -1.37 | -1.16 | -1.19 | -0.38 | 0.09  | -0.50 | -0.12 | -0.62 |
| BE139739 | Mitochondrial 28S ribosomal protein S27 (S27mt)               | -0.61 | -0.27 | 1.16  | 0.89  | -1.55 | 0.31  | 0.27  | 0.31  |
| BU118453 | microtubule-associated proteins 1A/1B                         | -1.14 | -0.72 | -1.39 | -0.85 | 1.11  | -0.49 | -0.25 | -0.39 |
| AJ447355 | methyl-CpG binding protein MBD3                               | 2.10  | 1.87  | 2.46  | 1.28  | 0.65  | 0.27  | 0.14  | 0.24  |
| BU383233 | Metastasis-associated protein MTA1                            | 0.35  | 0.02  | 1.66  | 0.00  | -0.52 | 1.57  | 0.10  | 0.10  |
| BU218542 | membrane component, chromosome 11, surface marker 1           | -1.90 | -1.96 | -2.68 | -1.46 | -0.07 | -0.73 | -0.27 | -0.51 |
| BU290092 | MASL1                                                         | 0.17  | 0.73  | 1.16  | 0.33  | -0.22 | 1.01  | 0.35  | 0.59  |
| BU278977 | major ampullate spidroin 1                                    | -0.03 | 1.22  | 0.64  | 0.55  | -2.00 | 0.22  | -0.14 | 0.69  |
| AI980805 | mahogunin, ring finger 1                                      | 2.14  | 1.57  | 1.18  | 1.20  | 0.89  | 0.43  | 0.57  | 0.48  |
| BG625303 | M19372 elastin                                                | 0.57  | -1.05 | -0.86 | -1.50 | -1.30 | -1.06 | -1.39 | -0.73 |
| BU304697 | lung alpha/beta hydrolase protein 1                           | 1.01  | 0.61  | 0.67  | 0.37  | 1.46  | 0.19  | 0.27  | 0.19  |
| BU364547 | limkain beta 2                                                | -0.74 | -1.83 | -1.34 | -0.34 | -0.05 | 0.39  | -0.39 | -0.38 |
| BU369268 | LIM domain only 1 (rhombotin 1)                               | -1.21 | -0.42 | -1.86 | -0.15 | -0.30 | -0.47 | -0.35 | -0.15 |
| BU434661 | leucine-zipper protein                                        | -0.74 | 0.71  | 1.18  | -0.14 | -1.65 | 1.39  | -0.33 | 1.28  |
| BU259396 | kinetochore protein Nuf2                                      | 0.11  | 1.63  | 1.98  | 1.87  | 0.05  | 0.97  | 0.28  | 0.42  |
| BU215619 | keratin I                                                     | 0.83  | 1.03  | -0.52 | 0.90  | -0.11 | -1.23 | 1.71  | 0.75  |
| BU376143 | intrinsic factor                                              | -1.52 | -1.19 | -1.45 | 0.56  | -2.92 | -0.33 | -0.47 | 0.38  |
| AW773238 | Interferon-gamma inducible protein Mg11                       | 2.93  | 1.70  | 2.07  | 0.92  | 0.55  | 0.59  | 0.51  | 0.68  |
| AI980049 | Interferon regulatory factor 1 (IRF-1)                        | 2.11  | 1.01  | 1.27  | 0.07  | 0.41  | 0.08  | 0.32  | -0.13 |
| BE139818 | INS-1 winged helix                                            | -0.15 | 1.18  | 0.98  | 0.21  | -1.03 | -0.05 | -0.02 | 0.19  |
| BU302452 | immunophilin XAP2                                             | -0.06 | 0.24  | -1.33 | -0.59 | -0.81 | -1.24 | -0.68 | -0.80 |
| AJ445576 | hydroxyproline-rich glycoprotein DZ-HRGP                      | 1.86  | 1.33  | 1.34  | 0.52  | 0.53  | -0.07 | -0.23 | 0.33  |
| BU462523 | huntingtin interacting protein HIP3RP                         | 0.41  | 0.72  | 1.50  | 0.80  | -1.84 | 1.16  | 0.92  | 0.84  |
| BU210300 | HTPAP                                                         | -1.45 | -0.13 | -1.59 | 0.21  | 1.06  | -0.73 | -0.15 | 0.14  |
| BU442039 | HSD5                                                          | -1.20 | -1.23 | -1.59 | 0.13  | 0.29  | -0.54 | -0.16 | -0.44 |
| BU255540 | HSD-4 protein                                                 | 0.46  | -0.37 | 0.79  | 0.26  | 1.06  | 1.08  | 0.17  | 0.02  |
| BU105032 | HP protein                                                    | 0.09  | -0.35 | -0.77 | -1.23 | -1.43 | -0.22 | -0.84 | -0.41 |
| BG625137 | Homodimeric Bifunctional Transformylase                       | -1.03 | -0.05 | -0.43 | -0.01 | -2.04 | -0.27 | -0.20 | -0.07 |
| BU230857 | Homeodomain protein NKx2.1                                    | -1.01 | -0.47 | -0.82 | -0.04 | -1.45 | -0.04 | -0.23 | 0.06  |
| BU380438 | Homeobox protein Meis2 (Meis1-related protein 1)              | -1.05 | -0.59 | -1.09 | -0.61 | -0.92 | -0.46 | -0.35 | -0.33 |
| BU401956 | hnRNP R                                                       | 0.46  | 1.23  | 1.55  | 0.44  | -0.60 | 1.46  | 0.04  | 0.44  |
| BU391363 | hnRNP H3                                                      | 1.08  | 1.18  | 1.25  | 0.80  | -0.82 | 0.91  | 0.64  | 0.94  |
| BU256108 | hnRNP H3                                                      | 0.31  | 0.56  | 1.46  | 0.69  | -0.55 | 1.25  | 0.66  | 0.75  |



|          |                                                                                                |       |       |       |       |       |       |       |       |
|----------|------------------------------------------------------------------------------------------------|-------|-------|-------|-------|-------|-------|-------|-------|
| BU358759 | hnRNP H                                                                                        | 0.62  | 1.25  | 1.90  | 0.66  | -2.52 | 1.55  | 0.82  | 0.94  |
| BU224748 | heterochromatin-like protein 1                                                                 | 0.33  | 1.14  | 0.53  | 0.32  | -1.07 | 0.28  | 0.28  | 0.62  |
| BU453398 | heat shock protein (hsp110 family)                                                             | 1.04  | 0.95  | 1.17  | 0.22  | -0.77 | 1.61  | 0.30  | 0.86  |
| BU486117 | heat shock protein                                                                             | -1.36 | -0.96 | -1.06 | -0.82 | -1.41 | -1.03 | -0.69 | -0.57 |
| AI981455 | Heat shock factor binding protein 1                                                            | -0.72 | -1.20 | -1.13 | -0.56 | 0.19  | -0.70 | -0.32 | -0.43 |
| BU297878 | HDCMC28P                                                                                       | 0.74  | 0.99  | 1.45  | 1.20  | 0.65  | 0.76  | 0.64  | 0.81  |
| BU204487 | GPR39                                                                                          | -0.92 | -1.11 | -1.25 | -0.62 | 0.24  | -0.65 | -0.75 | -0.74 |
| BU141574 | GM06493p                                                                                       | -1.17 | -0.37 | -1.09 | -0.49 | 0.37  | -0.98 | -0.70 | -0.47 |
| BU243138 | GH11824p                                                                                       | -0.38 | -1.16 | -1.85 | -1.44 | 0.48  | -0.82 | -0.57 | -0.97 |
| BU270903 | GH04120                                                                                        | -1.30 | -1.60 | -2.62 | -0.60 | -1.18 | -0.38 | 0.30  | -0.14 |
| BU279986 | GH02974                                                                                        | 0.19  | -0.41 | 0.10  | 0.34  | -1.53 | 0.90  | 1.02  | 0.79  |
| BU410172 | germin-like protein                                                                            | 0.88  | 1.09  | 1.73  | -0.04 | -1.42 | 1.98  | 0.43  | 0.78  |
| BU399744 | GAP SH3-domain binding protein 1(G3BP-1)                                                       | 0.96  | 1.12  | 1.52  | 0.03  | -2.10 | 1.72  | -0.02 | 0.98  |
| BG625628 | gag protein                                                                                    | -0.94 | -2.56 | -3.29 | -4.18 | 0.83  | 0.89  | -0.86 | 0.21  |
| AI980370 | G0S2-like protein                                                                              | 1.17  | 0.06  | -0.12 | -1.03 | 0.09  | -0.50 | -0.79 | -0.34 |
| BU327833 | FLJ11082-like protein                                                                          | -1.25 | -1.69 | -1.47 | -0.21 | 0.86  | -0.27 | -0.06 | -0.37 |
| BU473007 | fibrinogen silencer binding protein                                                            | 1.30  | 0.65  | 1.01  | -0.24 | -1.32 | 0.32  | -0.17 | 0.11  |
| BU307428 | farnesoid X receptor                                                                           | -1.45 | -0.81 | -1.59 | -0.04 | -1.28 | -0.56 | 0.24  | -0.05 |
| BU354003 | far upstream element (FUSE) binding protein 1                                                  | 0.23  | 0.81  | 1.50  | -0.05 | -0.92 | 1.43  | 0.07  | 0.42  |
| BU329624 | Exportin(tRNA)                                                                                 | 0.21  | 0.29  | 1.31  | 0.19  | -2.45 | 2.00  | 0.07  | 0.51  |
| BU132612 | erythrocyte membrane glycoprotein Rh50                                                         | 1.01  | -0.76 | -0.05 | -1.13 | 0.01  | -0.69 | -0.78 | -0.72 |
| BU223476 | ER-resident protein ERdj5                                                                      | -0.21 | -0.27 | 1.62  | 0.20  | -0.46 | 2.10  | 0.11  | 0.00  |
| BU381763 | eRF1                                                                                           | 1.72  | 1.41  | 2.51  | 0.41  | -0.80 | 1.55  | 0.54  | 0.98  |
| BU237107 | Epn2 protein                                                                                   | 1.16  | 1.00  | 0.34  | 0.40  | 0.43  | 0.12  | 0.23  | -0.19 |
| BU246177 | epithelial microtubule-associated protein                                                      | -1.31 | -1.74 | -1.71 | -0.06 | 0.30  | -0.07 | -0.09 | -0.04 |
| BU435606 | ephrin-B2 precursor                                                                            | 0.04  | -0.02 | 0.50  | -0.11 | -1.06 | 1.24  | -0.02 | 0.27  |
| BU307459 | envoplakin                                                                                     | -1.83 | -1.57 | -2.18 | -0.94 | -1.34 | -1.11 | -0.40 | -0.32 |
| BU405093 | env polyprotein                                                                                | -0.57 | -0.43 | -1.80 | -1.09 | 1.47  | -0.32 | -0.78 | -0.92 |
| BE139747 | ENV polyprotein                                                                                | 0.35  | -4.45 | -2.16 | -5.70 | -0.22 | -0.61 | -0.86 | -0.18 |
| BE139876 | ENV polyprotein                                                                                | 0.26  | -4.43 | -2.53 | -6.07 | -0.43 | -0.76 | -1.08 | -0.35 |
| AJ456383 | endothelin converting enzyme-1                                                                 | -0.60 | -1.27 | -1.28 | -0.86 | 0.16  | -0.63 | -0.47 | -0.74 |
| BU229678 | Elongation of very long chain fatty acids 4 protein                                            | -0.78 | -0.66 | -1.26 | -1.04 | 0.06  | -0.80 | -0.88 | -0.60 |
| BU386905 | Dvl-binding protein IDAX                                                                       | -1.20 | -1.31 | -2.13 | -0.58 | 0.59  | -1.06 | -0.51 | -0.70 |
| BU344983 | doublesex and mab-3 related transcription factor 2                                             | -1.03 | -1.12 | -1.45 | -0.53 | -0.85 | -0.72 | -0.12 | -0.41 |
| AI980356 | Dnm1p/Vps1p-like protein                                                                       | 1.30  | 0.27  | 1.00  | 0.27  | -1.23 | 0.51  | 0.47  | 0.32  |
| BU463511 | Dihydropyrimidinase related protein-1 (DRP-1) (Collapsin response mediator protein 1) (CRMP-1) | 1.10  | -0.28 | -0.19 | -1.38 | -0.48 | -0.30 | -0.47 | -0.44 |
| BU374186 | Dermal papilla derived protein 7 homolog                                                       | -0.84 | -1.03 | -1.50 | -0.28 | -1.14 | 0.10  | 0.33  | -0.01 |
| BU461532 | D430018P08 protein                                                                             | 0.25  | 0.23  | 1.41  | -0.20 | 0.32  | 1.78  | -0.19 | -0.03 |
| BU242831 | cytoplasmic dynein heavy chain                                                                 | -0.65 | -0.85 | -1.52 | 1.06  | 0.59  | 0.44  | 0.89  | 1.12  |
| BU294453 | Cytohesin 4                                                                                    | 1.81  | 1.70  | 1.54  | 0.58  | -0.72 | 0.07  | -0.20 | 0.35  |
| BU436784 | cysteine-rich motorneuron 1                                                                    | 0.16  | 0.20  | -0.11 | -0.53 | -1.14 | 1.09  | -0.10 | 0.11  |
| BU251989 | cypher2s                                                                                       | -1.62 | -1.92 | -1.71 | -3.12 | -0.65 | -0.85 | -0.81 | 0.06  |
| BE139910 | c-myb protein                                                                                  | -0.63 | -1.35 | -1.49 | -0.34 | -1.65 | -0.66 | -0.46 | -0.56 |
| BU406603 | CLLL6 protein                                                                                  | 0.53  | 0.34  | 1.09  | 0.43  | -1.12 | 0.25  | 0.26  | 0.25  |
| BU489375 | cisplatin resistance-associated overexpressed protein                                          | 0.42  | 1.12  | 1.16  | 0.98  | -0.33 | 0.83  | 0.72  | 0.95  |
| BU322829 | chromatin remodeling factor WCRF180                                                            | 1.49  | 1.73  | 0.80  | 0.72  | -0.18 | 0.09  | 0.03  | 0.79  |
| BU425455 | Chondroadherin (Cartilage leucine-rich protein)                                                | 0.53  | -0.21 | -1.58 | -1.41 | -1.55 | 0.38  | 0.54  | 0.33  |
| BU434066 | chloride intracellular channel 2                                                               | 0.77  | 1.49  | 1.87  | 0.42  | -1.53 | 0.71  | -0.07 | 0.89  |
| BU112075 | chicken retrotransposon ART-CH                                                                 | -1.54 | -1.20 | -2.78 | -0.80 | 0.02  | 0.01  | -0.17 | 0.16  |
| BU209668 | Chain A, Hincii Bound To Cognate Dna                                                           | -2.14 | -3.00 | -5.69 | -2.29 | -0.13 | 0.11  | 0.24  | -0.15 |
| BU355263 | CG9595-PA                                                                                      | -1.07 | -1.69 | -1.93 | -0.60 | 0.25  | -0.39 | -0.14 | -0.25 |
| BU379792 | CG9346-PA                                                                                      | 0.50  | 0.79  | 1.45  | 0.50  | -0.38 | 1.29  | -0.09 | -0.08 |
| BU388178 | CG8968-PA                                                                                      | -0.68 | -1.66 | -1.14 | -0.30 | 0.57  | -0.32 | 0.11  | -0.28 |
| BU467868 | CG1869-PA                                                                                      | 0.79  | 0.86  | 1.50  | 0.33  | -2.12 | 0.93  | 0.66  | 0.81  |
| BU217171 | CG18023-PA                                                                                     | -0.69 | -1.09 | -1.59 | -0.84 | -0.87 | -0.27 | 0.06  | -0.07 |
| BU226382 | CG1116-PA                                                                                      | 0.81  | 0.55  | 1.41  | 0.04  | -0.88 | 1.24  | 0.19  | 0.01  |
| BU462027 | centrosomal colon cancer autoantigen protein                                                   | -1.03 | -1.49 | -1.73 | -0.56 | -0.20 | -0.23 | 0.12  | -0.33 |
| BU115552 | CDA02                                                                                          | 0.68  | 1.11  | 0.74  | 0.61  | 1.07  | 0.57  | 0.50  | 0.57  |
| BU445165 | cardiac muscle factor 1                                                                        | -0.08 | 1.59  | 1.22  | 1.39  | 0.35  | -0.07 | -0.14 | -0.07 |
| BU362171 | carbamate kinase                                                                               | -1.06 | -1.09 | -1.00 | -0.41 | -0.39 | -0.68 | -0.26 | -0.38 |
| BU422433 | Calcipressin 1(Oxidative-induced protein Adapt78)                                              | 1.02  | 0.17  | 0.96  | -0.27 | 0.08  | 1.03  | -0.13 | -0.17 |

|          |                                                                                    |       |       |       |       |       |       |       |       |
|----------|------------------------------------------------------------------------------------|-------|-------|-------|-------|-------|-------|-------|-------|
| BF724018 | Cadherin 1; Epithelial cadherin                                                    | 0.49  | 1.71  | 2.46  | 1.56  | -1.14 | 2.73  | 0.00  | 1.72  |
| BU344100 | C4SR protein                                                                       | 0.76  | 0.71  | 1.23  | 0.99  | -0.45 | 1.31  | 0.67  | 1.04  |
| BU113132 | Bromodomain-containing protein 3 (RING3-like protein)                              | 0.56  | 0.33  | -0.31 | -1.12 | -1.15 | -0.02 | -0.29 | -0.23 |
| BU267608 | Bromodomain-containing protein 1                                                   | 0.08  | -0.21 | 1.27  | 0.08  | -0.97 | 1.31  | -0.18 | -0.02 |
| BU488041 | BRIX                                                                               | 1.00  | 0.89  | 1.57  | 0.55  | -1.13 | 0.22  | 0.20  | 0.69  |
| BU242857 | BOVIN Antigen WC1.1                                                                | 2.42  | 2.15  | 1.21  | 0.11  | -1.45 | -0.44 | -0.22 | -0.08 |
| BU422562 | BM-005                                                                             | 0.40  | -0.08 | 1.61  | 0.29  | -0.08 | 1.38  | -0.04 | 0.02  |
| BU106922 | blood plasma glutamate carboxypeptidase; prostate-specific membrane antigen (PSMA) | -1.57 | -2.20 | -2.08 | -2.13 | -0.70 | -1.09 | -0.62 | -0.38 |
| BU280546 | bile acid-Coenzyme A: amino acid N-acyltransferase                                 | -1.01 | -0.41 | -1.05 | 0.00  | 0.04  | -0.39 | 0.02  | -0.19 |
| BU295474 | Beta-galactoside-binding lectin                                                    | -0.91 | -1.46 | -3.05 | -1.72 | 0.23  | -0.63 | -0.72 | -0.36 |
| BG625654 | Beta-adrenergic receptor kinase 2 (G-protein coupled receptor kinase 3)            | 1.59  | 1.06  | 1.19  | 1.14  | 0.01  | 0.56  | 0.61  | 0.87  |
| AJ455178 | BC042580 expressed sequence AA409318                                               | 1.18  | 0.37  | 1.04  | 0.45  | 0.75  | -0.07 | -0.31 | 0.14  |
| BU419559 | BC029736 9830131G07 protein                                                        | 1.06  | -0.03 | -1.19 | -0.88 | -0.35 | 0.27  | -0.04 | 0.20  |
| BU125930 | basic helix-loop-helix domain containing, class B, 3                               | -1.40 | -0.49 | -1.46 | -0.39 | -0.39 | -0.28 | -0.18 | 0.13  |
| BU254799 | AW496496 protein                                                                   | -1.56 | -0.20 | -1.09 | -0.81 | -1.52 | 0.51  | 0.68  | 0.30  |
| BU314410 | AW209491                                                                           | 0.53  | 1.18  | 0.89  | 0.09  | -1.11 | 0.73  | 0.22  | 0.20  |
| BU248508 | atrial natriuretic peptide                                                         | -0.21 | 0.00  | 0.26  | -1.05 | -1.68 | 1.18  | -0.78 | 0.11  |
| BU337528 | ATP-dependent metalloprotease YME1L                                                | 0.82  | 0.64  | 1.51  | 0.35  | -0.34 | 1.88  | 0.50  | 0.59  |
| BU336283 | ATP(GTP)-binding protein                                                           | 1.02  | 1.28  | 2.05  | 0.93  | -0.10 | 1.31  | 0.57  | 0.36  |
| BU420277 | ATP synthase B' chain                                                              | 0.88  | 0.70  | 1.20  | -0.07 | -1.75 | 0.40  | 0.13  | 0.83  |
| BU204839 | AT3g60070/T2O9_50                                                                  | -1.29 | -1.04 | -1.51 | -0.87 | -0.21 | -1.01 | -0.54 | -0.44 |
| AJ456685 | AT3g58470/F14P22_60                                                                | -0.60 | -1.15 | -0.37 | 0.32  | 1.68  | 0.17  | 0.15  | -0.26 |
| BU358920 | artemis protein                                                                    | -0.75 | -0.77 | -1.00 | 0.01  | 1.25  | -0.43 | -0.32 | -0.16 |
| AW773182 | anthracycline-associated resistance ARX                                            | 1.62  | 0.82  | 1.31  | 0.05  | -1.20 | 0.24  | 0.10  | -0.07 |
| BU388561 | Ankyrin repeat domain protein 5                                                    | -0.95 | -1.79 | -2.31 | -0.75 | 0.29  | -0.09 | -0.13 | -0.51 |
| BU293377 | Angrem46                                                                           | -1.17 | -1.00 | -1.24 | -0.56 | -0.65 | -1.32 | -0.83 | -0.86 |
| BU385609 | Angiotensinase C (Lysosomal carboxypeptidase C)                                    | 0.76  | 1.36  | 0.34  | 0.13  | 1.23  | -0.67 | -0.51 | -0.63 |
| BU452211 | alpha-actinin associated LIM protein                                               | 0.24  | 0.15  | -0.68 | -1.68 | -1.89 | -0.52 | -0.07 | 0.23  |
| AI981175 | alpha1-acid glycoprotein                                                           | -0.25 | 0.14  | -0.99 | -0.46 | 0.02  | -1.14 | -0.85 | -1.13 |
| BU354524 | alpha tectorin                                                                     | 0.10  | 0.15  | -1.33 | -0.60 | -1.60 | 0.21  | 0.05  | 0.29  |
| BU455385 | ALFY                                                                               | 0.47  | 1.00  | 0.86  | 0.62  | 1.10  | -0.15 | -0.28 | 0.35  |
| BU252739 | AI648807 protein                                                                   | 0.76  | 1.08  | 1.71  | 0.47  | -1.14 | 1.22  | 0.54  | 0.56  |
| BG625074 | AF261137 HT031                                                                     | 1.72  | 1.35  | 0.90  | 0.88  | 0.65  | 0.61  | 0.72  | 0.27  |
| AI982246 | AF120211 protein A1                                                                | 2.02  | 1.27  | 1.83  | 0.17  | -0.18 | 0.35  | -0.16 | -0.02 |
| BU458805 | AD24                                                                               | 0.25  | 0.36  | 1.28  | -0.03 | -0.06 | 1.03  | -0.17 | 0.31  |
| BU249550 | acyl-peptide hydrolase                                                             | -1.14 | -0.31 | -1.15 | 0.03  | -1.48 | -0.57 | -0.41 | -0.18 |
| BU405246 | AB050448 ORF3                                                                      | 1.16  | 1.02  | 1.51  | 0.53  | -0.88 | 1.18  | 1.09  | 1.24  |
| BU204801 | AAF44869                                                                           | 0.08  | 0.51  | 1.04  | 0.07  | 1.10  | 0.47  | -0.29 | -0.16 |
| BU295789 | AA650895                                                                           | -1.41 | -1.04 | -1.29 | -0.50 | 0.02  | -0.94 | -0.64 | -0.64 |
| BU445825 | A disintegrin and metalloproteinase with thrombospondin motifs 9) (ADAM-TS 9)      | -1.00 | -0.41 | -1.08 | -0.43 | 0.31  | -0.90 | -0.54 | -0.41 |
| BU295361 | A disintegrin and metalloproteinase with thrombospondin motifs 18) (ADAM-TS 18)    | -0.20 | -1.03 | -1.05 | -0.62 | 0.50  | -0.24 | -0.08 | -0.19 |
| BU267799 | 60S ribosomal protein L38                                                          | -0.49 | -0.54 | -1.08 | -0.30 | -0.90 | -1.02 | -0.46 | -0.26 |
| BU369523 | 60S ribosomal protein L21                                                          | -1.05 | -0.83 | -1.12 | -0.39 | 0.33  | -0.97 | -0.81 | -0.45 |
| BG625675 | 5-carboxymethyl-2-hydroxymuconic acid isomerase                                    | -0.40 | -0.58 | -1.12 | -0.87 | -1.26 | -0.78 | -0.50 | -0.54 |
| BF845756 | 40S ribosomal protein S7                                                           | 0.16  | 1.58  | 2.05  | 1.53  | -0.48 | 2.08  | -0.16 | 1.55  |
| BU410124 | 25 kDa trypsin inhibitor                                                           | 1.18  | 0.72  | 0.01  | -0.57 | 0.58  | 0.34  | 0.31  | 1.09  |
| BU131652 | 14K beta-galactoside-binding lectin                                                | 0.94  | 0.40  | 0.08  | -0.21 | -1.81 | -1.03 | -0.81 | -0.76 |
| BU110983 | (Pre-mRNA splicing factor SRP20                                                    | 0.86  | 1.28  | 1.56  | 0.53  | -0.28 | 0.71  | 0.27  | 0.42  |
| BU460486 | zona pellucida B protein                                                           | -0.67 | -0.79 | -1.05 | 0.00  | 1.29  | 0.08  | 0.23  | 0.08  |
| BU280372 | ydfB                                                                               | -0.80 | -1.07 | -1.83 | -0.57 | 0.13  | 0.20  | 0.09  | -0.33 |
| AI980142 | Wpkci                                                                              | -0.62 | -0.03 | -2.14 | -1.94 | 0.90  | 0.05  | -1.45 | -1.12 |
| BU346446 | WDR9 protein                                                                       | 0.95  | 1.39  | 1.19  | 0.73  | -0.88 | 0.88  | 0.66  | 0.78  |
| BU450635 | WDR10p-L                                                                           | -1.56 | -1.20 | -1.56 | -0.27 | -2.19 | -0.25 | 0.16  | 0.16  |
| BU454370 | WD repeat endosomal protein                                                        | 0.69  | 0.44  | 1.80  | 0.33  | -0.66 | 1.86  | 0.36  | 0.29  |
| BU144271 | vimentin                                                                           | 0.90  | 0.51  | -0.21 | -1.06 | -1.24 | -0.39 | -0.13 | -0.23 |
| BU425330 | very large inducible GTPase-1                                                      | 4.34  | 2.41  | 3.14  | 0.44  | 0.29  | -0.12 | -0.28 | -0.45 |
| BU456315 | vanin-1                                                                            | 1.35  | 1.37  | 1.46  | 0.89  | -1.66 | 1.16  | 0.59  | 0.80  |
| BU265136 | Vacuolar protein sorting 35                                                        | 0.91  | 0.94  | 1.87  | 0.34  | -0.56 | 1.64  | 0.23  | 0.47  |

|          |                                                        |       |       |       |       |       |       |       |       |
|----------|--------------------------------------------------------|-------|-------|-------|-------|-------|-------|-------|-------|
| BU418915 | Unc119c                                                | -1.38 | -0.91 | -1.29 | -0.84 | -1.24 | -0.13 | 0.06  | -0.04 |
| BU127339 | UL36 protein                                           | 0.27  | 0.56  | 1.54  | 0.11  | 0.03  | 1.11  | 0.05  | 0.30  |
| BU438739 | UG0751c10                                              | 0.03  | -0.02 | -0.30 | -1.71 | -1.51 | 0.58  | 0.37  | 0.81  |
| AW773122 | tumor susceptibility protein 101                       | 1.82  | 1.17  | 0.56  | -0.27 | -0.20 | -0.42 | -0.08 | -0.19 |
| BU247854 | tumor suppressor LUCA15                                | -1.07 | -0.77 | -1.63 | -0.92 | 0.33  | -0.97 | -0.62 | -0.75 |
| BU364566 | Tumor differentially expressed protein 1               | 0.73  | 1.05  | 1.54  | 0.61  | -2.03 | 1.44  | 1.10  | 1.07  |
| BU311077 | Tuftelin                                               | 0.58  | 1.11  | -0.33 | 0.09  | -1.21 | 0.32  | 0.18  | 0.61  |
| BU322944 | tubulin-specific chaperone d                           | -1.52 | -0.84 | -1.39 | -0.19 | -0.23 | -0.55 | -0.29 | -0.13 |
| BU468890 | Trifunctional enzyme beta subunit                      | -1.22 | -0.54 | -0.80 | -0.54 | 1.07  | -0.55 | -0.37 | -0.44 |
| BG625520 | transmembrane protein 2                                | 0.85  | 1.06  | 1.26  | 0.61  | 1.18  | 0.03  | 0.21  | 0.15  |
| BU303842 | Transitional endoplasmic reticulum ATPase (TER ATPase) | 1.30  | 1.54  | 1.15  | 0.36  | -0.21 | 0.89  | -0.19 | 0.98  |
| BU448329 | TNF-related apoptosis inducing ligand                  | -0.37 | -0.51 | -1.15 | -0.49 | -1.25 | -0.61 | -0.45 | -0.46 |
| BU376769 | Tm7sf1 protein                                         | 2.23  | 0.62  | 0.65  | 0.34  | 1.38  | 0.82  | 0.74  | 0.56  |
| AI979954 | Tm7sf1 protein                                         | 1.20  | 0.04  | 0.09  | -0.02 | 1.26  | 0.27  | 0.13  | 0.06  |
| BU308275 | TLS-associated protein TASR-2                          | 0.35  | 1.13  | 0.87  | 1.08  | 0.42  | 0.84  | 0.78  | 0.80  |
| BU222951 | thyroid receptor interactor                            | -1.54 | -1.17 | -1.45 | -0.70 | -0.97 | -0.74 | -0.51 | -0.54 |
| BU252874 | Threonine synthase(TS)                                 | -1.06 | -0.74 | -1.85 | -0.21 | -1.19 | 0.08  | 0.26  | 0.04  |
| AI980616 | Thiosulfate sulfurtransferase(Rhodanese)               | -1.01 | -1.08 | -1.17 | 0.15  | 0.25  | -0.20 | 0.10  | -0.16 |
| BU377508 | tetratricopeptide repeat-containing protein            | -1.22 | -1.19 | -1.25 | 0.42  | -0.03 | 0.02  | 0.36  | -0.02 |
| BU242971 | Tetratricopeptide repeat protein 4 (My044 protein)     | -0.52 | -1.27 | -3.68 | -2.06 | -3.27 | -0.29 | -0.14 | -0.22 |
| BG625130 | testis-specific receptor 2-like protein TRR            | 0.22  | -1.04 | 1.10  | -0.38 | 0.70  | 0.04  | 0.94  | 0.04  |
| BU289443 | tektin A1                                              | -1.47 | -2.70 | -4.14 | -0.26 | 0.26  | -0.11 | 0.15  | -0.17 |
| AJ455199 | Structure-specific recognition protein 1 (SSRP1)       | -1.00 | -0.95 | -1.19 | 0.18  | 0.81  | -0.27 | 0.31  | -0.45 |
| BU201697 | stretch response protein 553                           | -0.36 | -0.52 | -0.91 | -2.44 | -1.32 | -0.24 | 0.13  | 0.54  |
| BU204441 | SR-related CTD associated factor 6                     | -1.24 | -0.96 | -1.08 | -0.79 | -0.64 | -1.07 | -0.74 | -0.73 |
| BU388913 | spermatid perinuclear RNA-binding protein              | 0.19  | 0.23  | 1.15  | 0.10  | -0.66 | 1.04  | -0.07 | 0.10  |
| BU401260 | Spastin                                                | 0.60  | 1.35  | 1.17  | 0.29  | -0.71 | 0.48  | 0.07  | 0.26  |
| BU486695 | SMAP-4                                                 | 0.81  | 1.08  | 1.21  | 0.53  | 0.79  | 0.59  | 0.09  | 0.32  |
| BU118785 | Secretogranin I (Chromogranin B)                       | 0.38  | -1.24 | -2.40 | -3.13 | 0.10  | -1.31 | -0.83 | -0.56 |
| BU287012 | SEC10-like 1                                           | 0.92  | 0.26  | 1.68  | 0.20  | -0.25 | 2.04  | 0.41  | 0.15  |
| BU374601 | scotin                                                 | 3.19  | 2.45  | 2.76  | 1.27  | 2.01  | 0.81  | 0.35  | 1.19  |
| BU109808 | SCC-112                                                | 0.14  | 0.30  | 1.21  | -0.16 | -2.10 | 1.15  | -0.33 | -0.19 |
| BU249559 | SAM-domain protein SAMSN-1                             | 1.86  | 1.61  | 2.47  | 0.75  | 0.78  | 0.30  | -0.21 | 0.67  |
| BU231707 | RNA-binding protein EWS (EWS oncogene)                 | 0.34  | 1.28  | 0.09  | 0.45  | -1.73 | -0.06 | -0.63 | 0.54  |
| BE139774 | RNA splicing-related protein                           | 0.41  | 0.53  | 1.31  | 0.56  | -0.29 | 1.30  | 0.22  | 0.56  |
| BU384561 | ribosomal protein L34                                  | -1.36 | -1.19 | -1.30 | -0.50 | -0.11 | -1.07 | -0.73 | -0.71 |
| BU291292 | Ribonuclease homolog (RSFR)                            | 3.43  | 3.63  | 2.27  | 1.81  | 0.70  | 0.06  | 0.41  | 0.41  |
| AI981081 | Ribonuclease homolog (RSFR)                            | 3.35  | 3.24  | 2.76  | 1.92  | -0.05 | 0.32  | 0.45  | 0.34  |
| BU245445 | retinal short chain dehydrogenase reductase            | 0.79  | 0.10  | 0.39  | -0.50 | -1.95 | 1.30  | 0.11  | 0.40  |
| BU338028 | Regulator of G-protein signaling 20 (RGS20)            | -0.06 | 0.47  | 1.67  | 0.55  | 1.71  | -0.06 | -0.07 | 0.48  |
| BE139770 | regulator of chromatin                                 | 0.19  | 0.97  | 1.87  | 1.07  | -1.42 | 2.42  | 0.81  | 1.38  |
| BU313654 | regucalcin                                             | -1.34 | -0.67 | -1.69 | -0.32 | 0.49  | -0.67 | -0.29 | 0.20  |
| BU202829 | receptor kinase I-interacting protein SIP              | -1.25 | 0.03  | -1.44 | -0.52 | 0.27  | -0.87 | -0.57 | -0.30 |
| AI980929 | quiescence-specific protein                            | 2.73  | 3.07  | 2.41  | 2.34  | 0.47  | 0.22  | -0.02 | 0.38  |
| BU313645 | puromycin-sensitive aminopeptidase                     | -0.51 | 0.64  | 0.66  | 0.52  | -2.68 | 0.71  | -0.32 | 1.17  |
| BU213224 | PTD008 protein                                         | -1.06 | -0.34 | -1.18 | 0.21  | -0.58 | -0.97 | -0.60 | -0.62 |
| BU274612 | Protein-tyrosine phosphatase corkscrew                 | 0.45  | 0.50  | 0.76  | -0.26 | -1.76 | 1.13  | -0.39 | 0.39  |
| AI979785 | protein-tyrosine kinasefyn                             | 1.47  | 1.09  | 1.40  | 0.55  | 0.47  | 0.58  | 0.41  | 0.48  |
| BU124683 | Protein-glutamine glutamyltransferase E                | -0.35 | -1.00 | -0.21 | -0.18 | 1.34  | 0.01  | -0.03 | 0.16  |
| BU105361 | protein-100                                            | 0.08  | 1.82  | 1.83  | 1.22  | -0.24 | 0.41  | 0.21  | 0.32  |
| BU370504 | protein kinase NYD-SP5                                 | -0.81 | -3.12 | -3.25 | -0.34 | 0.16  | 0.01  | 0.46  | -0.18 |
| BU247381 | Protein FAM13A1 (Precm1 protein)                       | -0.33 | -1.46 | -1.99 | -1.58 | 0.48  | -0.70 | -0.09 | -0.42 |
| BU412099 | protein band 4.1-like protein 4                        | -0.85 | -1.31 | -1.70 | -2.25 | -0.12 | -0.58 | -0.60 | -0.29 |
| BU383474 | protein A1                                             | 1.77  | 1.66  | 2.28  | 0.84  | 0.72  | 0.51  | -0.42 | 0.01  |
| BU437580 | proline rich protein                                   | 0.32  | 0.83  | 2.36  | -0.01 | -0.65 | 1.82  | -0.27 | -0.10 |
| BU294989 | pre-B cell enhancing factor                            | 2.48  | 1.18  | 1.32  | -0.17 | 1.02  | 0.26  | 0.29  | 0.17  |
| BU447879 | porimin                                                | 2.49  | 1.16  | 2.46  | 0.38  | -0.77 | 1.78  | 0.83  | 0.31  |
| BU455249 | polysialyltransferase                                  | 1.72  | 1.51  | 1.63  | 0.63  | -0.72 | -0.06 | 0.06  | 0.13  |
| AJ445713 | polypyrimidine tract-binding protein PTB-1             | 1.12  | 0.48  | 0.59  | 0.19  | 1.15  | 0.19  | 0.28  | 0.20  |
| AA495710 | pleckstrin                                             | 1.07  | 0.92  | 1.22  | 0.22  | 0.70  | 0.00  | -0.07 | 0.08  |
| AI979746 | Plasma retinol-binding protein (PRBP)                  | 0.86  | -0.07 | 0.12  | 1.04  | 1.90  | 0.05  | 0.38  | 0.28  |
| BU259716 | PKY protein kinase                                     | 0.53  | -0.16 | 1.19  | -0.05 | -0.53 | 2.00  | 0.34  | 0.33  |

|          |                                                          |       |       |       |       |       |       |       |       |
|----------|----------------------------------------------------------|-------|-------|-------|-------|-------|-------|-------|-------|
| BU242983 | PKC-regulated kinase PKK                                 | -1.05 | -1.05 | -0.93 | 0.04  | 0.24  | -0.59 | -0.36 | -0.58 |
| BU457321 | PiUS                                                     | 1.62  | 0.51  | 1.04  | -0.02 | -1.24 | 1.06  | 0.35  | 0.95  |
| BU415405 | pigment epithelial-differentiating factor                | 0.14  | -0.74 | -1.20 | -1.27 | -1.41 | -0.69 | -0.50 | -0.44 |
| BU341633 | phosphotyrosyl phosphatase                               | -1.04 | -0.87 | -1.11 | 0.65  | 0.75  | 0.14  | -0.34 | 0.13  |
| BU437321 | phospholipase C-like 2                                   | -1.10 | -1.43 | -1.29 | -0.95 | 0.35  | -0.51 | -0.78 | -0.71 |
| BU289679 | phosphatidylinositol 3-kinas                             | 0.85  | 0.57  | 1.07  | 0.28  | -1.02 | 0.45  | 0.19  | 0.15  |
| BU288255 | PF20 variant 1a                                          | -0.66 | -1.10 | -1.18 | 0.40  | -2.15 | 0.84  | 0.67  | 1.07  |
| BU243069 | Paired basic amino acid cleaving enzyme 4                | -1.08 | -0.20 | -1.31 | -0.21 | -1.35 | -0.48 | 0.12  | 0.05  |
| BU202917 | PACRG                                                    | -2.16 | -3.20 | -5.42 | -1.11 | -0.12 | -0.31 | -0.33 | 0.13  |
| BU288160 | p48                                                      | 0.40  | 0.64  | 1.24  | 0.35  | -0.54 | 1.14  | 0.12  | 0.26  |
| BU322600 | p40                                                      | -1.19 | -0.73 | -1.34 | -0.38 | -0.65 | -0.76 | -0.43 | -0.21 |
| BU278258 | P0504D03.17                                              | -0.45 | -0.57 | -1.06 | -0.62 | 1.23  | -0.58 | -0.17 | 0.03  |
| BU423531 | oxidored-nitro domain-containing protein                 | -0.81 | -0.78 | -1.85 | 0.54  | 1.03  | -0.17 | 0.13  | 0.05  |
| BU280929 | oxidored-nitro domain-containing protein                 | -1.06 | -0.57 | -2.40 | 0.11  | -0.03 | -0.04 | 0.17  | 0.27  |
| AI980545 | Ovoinhibitor                                             | -0.32 | -0.98 | -1.82 | -0.99 | -1.38 | -0.21 | -0.13 | -0.04 |
| BG625306 | osteopontin                                              | 2.39  | 0.66  | 0.97  | -1.12 | 0.31  | -0.76 | -0.60 | 0.25  |
| BU138020 | osteoblast 6D12C protein                                 | -1.94 | -2.11 | -1.10 | -1.22 | -1.18 | -0.59 | -0.79 | -0.89 |
| AJ392337 | origin recognition complex subunit 1                     | 1.14  | 1.27  | 1.91  | 1.02  | 0.58  | 0.09  | 0.18  | 0.19  |
| BU229185 | oocyte-specific protein P100                             | 1.78  | 1.07  | 0.67  | 0.08  | -0.34 | -0.57 | -0.48 | -0.05 |
| BU403351 | O-methyltransferase                                      | 0.27  | -0.34 | -1.04 | -1.21 | -0.55 | -0.73 | -0.18 | -0.57 |
| BG625099 | olfactory receptor protein                               | 3.24  | 2.93  | 2.37  | 1.74  | 0.94  | 0.48  | 0.55  | 0.49  |
| BU295742 | OCTN1                                                    | -1.00 | -1.02 | -1.17 | -1.10 | 0.97  | -0.78 | -0.62 | -0.48 |
| BU416483 | NY-REN-41 antigen                                        | -1.40 | -1.90 | -2.38 | -0.31 | -0.71 | -0.68 | -0.25 | -0.36 |
| BU133629 | nucleolar RNA-associated protein alpha                   | 0.65  | 1.02  | 0.56  | 0.33  | -1.06 | -0.31 | -0.28 | 0.73  |
| BU252755 | nucleolar protein ANKT                                   | 0.13  | 1.25  | 1.68  | 1.06  | 0.03  | 0.24  | 0.12  | 0.21  |
| BG625527 | Niban-like protein                                       | 1.06  | 0.35  | 1.04  | 0.07  | -0.26 | -0.12 | -0.12 | -0.31 |
| BU412534 | N-acetylglucosamine-6-sulfatase (G6S)                    | 2.14  | 1.20  | 1.08  | 0.35  | -0.11 | 0.14  | 0.27  | 0.03  |
| BU250490 | myocyte inner nuclear membrane protein                   | -0.66 | -0.91 | -1.51 | -1.11 | 0.52  | -0.45 | 0.18  | 0.24  |
| BU322962 | Myeloid leukemia factor 1                                | -0.75 | -0.90 | -2.35 | -0.23 | -1.70 | -0.11 | 0.16  | -0.29 |
| BU457953 | Mx                                                       | 4.20  | 2.02  | 1.43  | 0.17  | -0.42 | 0.04  | 0.73  | -0.77 |
| BU407723 | Mosaic protein LGN                                       | -1.70 | -0.79 | -1.72 | -0.23 | 0.02  | -0.44 | -0.42 | -0.49 |
| BE140041 | moesin                                                   | 1.05  | 0.72  | 0.74  | -0.35 | -1.39 | -0.10 | -0.27 | -0.12 |
| AW773274 | moesin                                                   | 1.54  | 1.22  | 0.63  | -0.25 | -1.18 | -0.19 | -0.13 | 0.02  |
| BF724022 | moesin                                                   | 1.30  | 0.94  | 1.09  | -0.22 | -1.54 | 0.09  | -0.13 | -0.08 |
| BE139809 | moesin                                                   | 1.40  | 0.94  | 0.89  | -0.25 | -1.84 | 0.07  | -0.06 | 0.06  |
| AW773111 | moesin                                                   | 1.81  | 1.09  | 1.19  | 0.20  | -1.39 | 0.32  | 0.39  | 0.53  |
| BU461717 | MLL5                                                     | -1.38 | -1.22 | -1.99 | -1.30 | -0.56 | -1.19 | -0.74 | -1.13 |
| BU212812 | mKIAA0473 protein                                        | 1.09  | -0.51 | -0.64 | -1.09 | -0.45 | -0.54 | -0.51 | -0.53 |
| BU407254 | mitochondrial ribosomal protein L37                      | -1.23 | -0.20 | -1.08 | -0.08 | 0.01  | -0.34 | -0.26 | -0.25 |
| BU208731 | mitochondrial ribosomal protein L10                      | -1.30 | -1.56 | -2.13 | -1.62 | -0.27 | -0.15 | -0.02 | -0.32 |
| BU240885 | membrane-bound aminopeptidase P                          | -0.71 | -1.10 | -1.82 | -0.38 | 0.35  | -0.02 | 0.33  | 0.04  |
| BU448724 | membrane-associated protein MAP17                        | -1.00 | -1.22 | -1.76 | -1.23 | 0.48  | -0.68 | -0.26 | -0.50 |
| BU452684 | Meiosis expressed protein 1                              | -0.90 | -1.57 | -2.26 | 0.55  | 0.57  | -0.50 | 0.10  | -0.31 |
| BU239299 | MDS022                                                   | 1.67  | 0.16  | 0.02  | -0.43 | 1.33  | -0.24 | -0.08 | -0.12 |
| BU220592 | mDia interacting protein-1                               | -0.78 | -1.09 | -1.01 | -0.37 | 0.52  | -0.34 | -0.39 | -0.51 |
| BU250393 | MDC-3.13 isoform 2                                       | -0.41 | 1.41  | 1.03  | 1.08  | 0.13  | -0.16 | 0.00  | 0.27  |
| BU383528 | mammalian ependymin related protein-2                    | -0.76 | -0.82 | -1.45 | -1.60 | 0.25  | -0.52 | -0.80 | -0.36 |
| BU382793 | Lzf-pending protein                                      | -1.02 | -0.75 | -1.47 | -0.60 | 0.67  | -0.61 | -0.08 | 0.03  |
| AI980092 | Lysozyme C                                               | -0.61 | -1.37 | -2.46 | -1.47 | -1.11 | -0.80 | -0.54 | -0.05 |
| BU269925 | Ly-6 antigen/uPA receptor-like domain-containing protein | -1.61 | -1.54 | -1.87 | -1.11 | -0.14 | -0.33 | -0.17 | -0.43 |
| BU200487 | lung seven transmembrane receptor 1                      | 0.61  | 0.54  | 1.20  | -0.20 | -1.19 | 1.04  | 0.05  | 0.36  |
| BU259674 | LP10549p                                                 | -1.04 | -0.73 | -1.02 | -0.03 | -0.08 | -0.67 | -0.14 | -0.10 |
| BU438909 | LOC270153 protein                                        | 0.99  | 1.17  | 2.00  | 1.76  | 0.68  | 0.28  | 0.47  | 0.84  |
| BU105057 | LIS1-interacting protein NUDE1                           | 0.99  | 1.13  | 1.03  | -0.02 | -0.72 | -0.15 | -0.37 | -0.02 |
| AI982243 | LIM domain only 4 protein                                | -1.01 | -1.12 | -1.19 | -0.59 | -0.52 | -0.58 | -0.63 | -0.56 |
| BU437686 | laforin                                                  | -0.69 | -0.47 | -1.12 | -1.35 | -1.52 | -0.33 | -0.53 | 0.07  |
| BU247036 | KPL2                                                     | -1.21 | -1.50 | -2.36 | 0.21  | 0.08  | -0.49 | -0.11 | -0.20 |
| BU217369 | kinase related protein                                   | -0.11 | -0.56 | -1.43 | -1.29 | 0.07  | -0.39 | 0.08  | -0.10 |
| BU405149 | JKTBP                                                    | -0.03 | 1.18  | 1.27  | 0.74  | -0.70 | 0.16  | 0.06  | 0.71  |
| BU246607 | IP63 protein                                             | -1.05 | -1.49 | -1.07 | -0.08 | -1.45 | 0.65  | 0.36  | 0.53  |
| BU128229 | intersectin long isoform                                 | 0.64  | 0.85  | 1.03  | -0.28 | -1.27 | 0.63  | -0.25 | 0.04  |
| BG625387 | interleukin-1beta                                        | 3.43  | 2.45  | 1.09  | 0.58  | 0.56  | 1.34  | 0.75  | 0.68  |

|          |                                                                      |       |       |       |       |       |       |       |       |
|----------|----------------------------------------------------------------------|-------|-------|-------|-------|-------|-------|-------|-------|
| BU254526 | integral membrane serine protease Sepsase                            | 1.13  | 0.84  | 1.42  | -0.23 | -1.17 | 1.79  | 0.58  | 0.22  |
| BF723782 | Integral membrane glycoprotein gp210                                 | 0.48  | 1.05  | 1.50  | 0.47  | 0.54  | 0.88  | 0.24  | 0.55  |
| BG625098 | inducible transcription factor Egr-1                                 | 1.09  | -0.52 | -0.93 | -0.77 | 0.65  | 1.15  | -1.28 | 0.13  |
| BU403367 | Ierepo4-pending protein                                              | -0.88 | -1.32 | -1.80 | -1.15 | 0.78  | -0.58 | -0.61 | -0.47 |
| BU128901 | hypothalamus protein HT002                                           | -1.03 | -1.95 | -0.41 | -0.14 | 0.99  | -0.16 | 0.07  | -0.41 |
| BU327624 | HPV16 E1 protein binding protein                                     | -0.25 | 1.17  | 0.89  | 0.65  | 1.32  | -0.37 | -0.21 | -0.23 |
| BU324648 | HP protein                                                           | -0.04 | -0.30 | 1.16  | -0.04 | -1.21 | 1.13  | -0.12 | -0.06 |
| BU213897 | homer-1b                                                             | -0.55 | -0.83 | -1.56 | -1.51 | -0.09 | -0.46 | -0.15 | -0.29 |
| BU134927 | Homeotic Ultrabithorax protein                                       | -1.13 | -0.48 | -1.03 | 0.23  | -0.90 | -0.28 | -0.08 | -0.08 |
| BU400453 | Homeobox protein Hox-D13 (Hox-4I)                                    | 0.28  | 0.92  | 1.20  | 0.10  | -2.40 | 0.61  | -0.09 | 0.66  |
| AW773177 | H-l(3)mbt-like protein                                               | -1.24 | -0.15 | -1.72 | -0.36 | 0.01  | -0.82 | -0.57 | -0.37 |
| BU285935 | histidine triad protein member 5                                     | -1.63 | -0.96 | -2.15 | -1.02 | -1.83 | -1.16 | -0.63 | -0.42 |
| BU463884 | heterochromatin-associated protein MENT                              | 3.19  | 2.53  | 1.95  | -0.20 | -0.05 | 0.10  | -0.04 | 0.89  |
| BG625247 | heterochromatin-associated protein MENT                              | 4.01  | 3.48  | 2.85  | 0.14  | 1.32  | 0.30  | 0.25  | 0.84  |
| BU455732 | Hepatocyte nuclear factor 1a                                         | -1.60 | -0.95 | -1.61 | 0.00  | 0.59  | -0.80 | -0.48 | -0.36 |
| BU250264 | hemoglobin beta chain                                                | 0.23  | -1.61 | -1.44 | -2.29 | -0.87 | -1.61 | -1.81 | -1.07 |
| BG625455 | hemoglobin beta chain                                                | 0.18  | -2.15 | -1.46 | -2.62 | -1.16 | -1.83 | -2.37 | -1.19 |
| BU286176 | heart/fetal otoferlin                                                | -0.91 | -2.11 | -2.61 | -1.97 | -0.21 | -1.23 | -1.09 | -0.96 |
| BU315919 | HBS1-like protein                                                    | 0.14  | 0.09  | 1.01  | 0.02  | -0.03 | 1.19  | 0.19  | 0.39  |
| BU120659 | harmonin isoform a1                                                  | -0.54 | -0.84 | -1.41 | -0.24 | 1.58  | -0.02 | 0.27  | 0.31  |
| AI980812 | guanylate binding protein                                            | 2.03  | 1.04  | 1.08  | 0.09  | -0.18 | -0.29 | -0.39 | -0.43 |
| BU345438 | Guanine nucleotide-binding protein G(I)/G(S)/G(T) beta subunit 1     | 1.77  | 0.92  | 1.72  | 0.05  | -1.21 | 1.78  | 0.41  | 0.43  |
| BU248114 | G-patch domain containing protein                                    | -0.27 | 0.13  | 1.15  | 0.05  | -1.17 | 0.69  | -0.34 | -0.17 |
| BU225914 | gp121                                                                | -1.78 | -2.46 | -3.26 | -0.34 | -0.08 | -0.26 | -0.15 | -0.32 |
| BU298713 | glia maturation factor beta                                          | 1.22  | 1.04  | 1.35  | 0.83  | 0.71  | 0.89  | 0.33  | 0.49  |
| BU369388 | GH26207p                                                             | -1.49 | -1.75 | -2.22 | -0.78 | -0.02 | -0.32 | -0.11 | -0.35 |
| BU290384 | GH04176p                                                             | -1.54 | -1.43 | -2.91 | -0.18 | -0.68 | -0.11 | 0.26  | 0.11  |
| BG625245 | Geranylgeranyl transferase type II beta subunit                      | 1.00  | 0.65  | 1.23  | 0.44  | 1.01  | 0.85  | 0.61  | 0.30  |
| BU425821 | GCN5-like protein                                                    | 0.46  | 0.69  | 1.13  | 0.25  | -1.11 | 0.73  | 0.11  | 0.44  |
| BU212596 | GalNAc-4-sulfotransferase 2                                          | -1.12 | -2.37 | -2.86 | -1.05 | 0.04  | 0.20  | 0.21  | -0.67 |
| AW773311 | gag protein                                                          | 0.40  | 0.38  | 1.32  | 0.37  | -2.43 | 0.78  | 0.31  | 0.88  |
| BU130241 | GA binding protein alpha chain (GABP)                                | 0.58  | 0.61  | 1.89  | 0.19  | -0.12 | 1.62  | 0.05  | 0.12  |
| BU264286 | G protein-coupled receptor PGR4                                      | -0.01 | -0.31 | -1.00 | -0.39 | -1.03 | 0.77  | 0.29  | 0.22  |
| BU375773 | G protein-coupled receptor 56                                        | 0.08  | -0.43 | -1.58 | -1.10 | -1.50 | -0.41 | -0.04 | -0.03 |
| BU366331 | G protein-coupled receptor                                           | 1.46  | 1.70  | 2.64  | 1.13  | 0.87  | 0.35  | 0.25  | 0.67  |
| BU225634 | FUSE binding protein 3                                               | 0.54  | 0.79  | 0.49  | 0.45  | -1.43 | 0.96  | 0.96  | 1.21  |
| BU398848 | fragile-X-related protein 1 isoform b                                | 0.08  | -0.16 | 1.67  | -0.20 | -1.45 | 1.76  | 0.14  | 0.26  |
| BU139442 | foocen-s                                                             | -1.59 | -0.95 | -1.81 | -1.37 | -0.46 | -1.20 | -1.23 | -0.71 |
| BU321187 | FN5 protein                                                          | -1.48 | -2.31 | -2.73 | -1.26 | -1.06 | -1.25 | -0.58 | -1.01 |
| BU425787 | FIP1 protein                                                         | 0.30  | 0.59  | 1.27  | 0.36  | -1.43 | 0.69  | 0.25  | 0.45  |
| BU321641 | fibroblast growth factor-binding protein                             | 1.46  | 0.12  | -0.12 | -0.54 | -1.17 | 0.66  | 0.21  | 0.35  |
| BU254111 | Fibrillarin (34 kDa nucleolar scleroderma antigen)                   | -1.02 | -1.14 | -0.15 | 0.03  | 0.35  | -0.43 | -0.23 | -0.38 |
| BU243927 | fatty acid hydroxylase                                               | -1.70 | -1.94 | -3.17 | -0.91 | -1.42 | -0.01 | 0.42  | 0.03  |
| AW773113 | F5D14.3 protein                                                      | 1.12  | 0.76  | 1.82  | 0.22  | -1.38 | 1.16  | 0.40  | 0.72  |
| BU245618 | extra large alpha stimulating guanine-nucleotide binding polypeptide | 0.15  | 1.20  | 1.11  | 0.66  | -1.08 | 1.81  | -0.01 | 0.49  |
| BU265772 | exonuclease 1                                                        | 0.30  | 1.18  | 1.33  | 0.66  | 1.12  | -0.04 | 0.14  | -0.26 |
| AJ398033 | EVI2A protein (Ecotropic viral integration site 2A protein)          | 2.36  | 1.19  | 1.96  | 1.12  | 1.41  | 0.49  | 0.67  | 0.55  |
| BU362271 | EVG1                                                                 | -1.06 | -1.99 | -3.08 | 0.40  | -0.33 | 0.09  | 0.70  | 0.68  |
| BU226370 | Erythrocyte membrane protein band 4.2 (P4.2)                         | 1.00  | -0.44 | -0.57 | -1.05 | 0.20  | -0.83 | -0.86 | -0.50 |
| AI981398 | envelope protein                                                     | -1.25 | -1.61 | -2.27 | -0.54 | -0.37 | 0.49  | 0.50  | 0.46  |
| AJ456794 | Endoplasmic (Heat shock 108 kDa protein)                             | 1.27  | -0.04 | 1.92  | 0.23  | -0.15 | 0.63  | -0.52 | -0.59 |
| BU283548 | Ellis-van Creveld syndrome protein (DWF-1)                           | -0.99 | -1.25 | -1.69 | -0.59 | 0.17  | -0.55 | -0.17 | -0.55 |
| BU199689 | EEG1L                                                                | -0.10 | -1.14 | -1.41 | -0.86 | 0.03  | -0.55 | -0.80 | -0.80 |
| BU274473 | dynein 2 light intermediate chain                                    | -1.22 | -1.86 | -1.72 | 0.26  | 1.23  | -0.42 | -0.07 | -0.63 |
| BU228189 | dynammin-like protein                                                | -0.86 | -0.71 | -1.41 | -1.01 | -0.50 | -0.73 | -0.37 | -0.33 |
| BU366207 | Dual specificity protein phosphatase 15                              | -0.36 | -1.17 | -2.29 | -0.29 | 0.37  | -0.27 | 0.26  | 0.47  |
| BU323882 | Dual specificity protein kinase TTK(PYT)                             | 0.16  | 2.17  | 1.78  | 1.37  | 0.85  | 0.19  | 0.01  | 0.13  |
| BU356732 | DRAPC1                                                               | -1.63 | -0.91 | -2.19 | -0.98 | -0.67 | -0.45 | -0.23 | -0.21 |
| BU383782 | Dp71 protein                                                         | -1.74 | -1.55 | -2.31 | -1.79 | -1.40 | -1.00 | -0.67 | -0.57 |
| BG625581 | dodecenoyl-CoA delta-isomerase                                       | -0.26 | -1.05 | -1.02 | -0.20 | 0.24  | -0.02 | 0.00  | -0.12 |
| BU294709 | D-erythrose reductase                                                | -1.74 | -1.06 | -2.10 | -0.44 | 0.74  | -0.63 | -0.38 | -0.23 |
| BU451106 | Defender against cell death 1 (DAD-1)                                | -0.91 | -1.03 | -1.38 | -0.27 | 1.14  | -1.12 | -0.35 | -0.75 |

|          |                                                             |       |       |       |       |       |       |       |       |
|----------|-------------------------------------------------------------|-------|-------|-------|-------|-------|-------|-------|-------|
| BU374539 | DEC-205                                                     | -1.15 | -1.29 | -0.99 | -0.08 | 0.31  | -0.60 | -0.16 | -0.87 |
| BU260257 | DAZ-associated protein 1                                    | 0.92  | 1.53  | 0.38  | 1.01  | 0.68  | 0.52  | -0.20 | 0.64  |
| BU288062 | cytomegalovirus partial fusion receptor                     | 0.86  | 0.37  | 1.40  | 0.21  | 0.47  | 1.43  | 0.54  | 0.30  |
| BU211078 | cysteine conjugate beta-lyase                               | -1.13 | -1.63 | -0.80 | -0.33 | 0.06  | 0.06  | 0.08  | -0.41 |
| BU326323 | CTD-binding SR-like protein RA4                             | 0.22  | 1.24  | 1.39  | 0.74  | -0.45 | 0.31  | 0.28  | 0.50  |
| BU223275 | CTCL tumor antigen se20-10                                  | 0.01  | 2.49  | 1.79  | 1.10  | 0.68  | 0.32  | -0.22 | 0.04  |
| BU139747 | CTCL tumor antigen HD-CL-04                                 | -0.65 | -1.27 | -0.41 | -0.60 | -1.09 | 0.38  | 0.30  | 0.10  |
| BU341886 | crystallin, lamda 1                                         | -0.04 | 0.25  | 1.48  | -0.09 | -0.78 | 2.26  | 0.04  | 0.20  |
| BU250020 | c-myb protein                                               | -0.31 | -1.42 | -1.07 | -0.07 | -1.52 | -0.46 | -0.12 | -0.46 |
| BU355410 | c-Mpl binding protein                                       | 0.40  | -0.21 | 1.43  | 0.18  | -0.53 | 1.59  | 0.34  | 0.33  |
| BU262455 | cisplatin(CDDP) resistance related protein CRR9             | 0.19  | 0.06  | 1.13  | 0.02  | -0.34 | 1.69  | 0.16  | 0.22  |
| BU316572 | cis Golgi-localized calcium-binding protein                 | -0.76 | 0.29  | -1.19 | -0.24 | -1.19 | -0.32 | -0.26 | 0.02  |
| BU410181 | chondromodulin-I                                            | 0.58  | -0.30 | -2.21 | -2.26 | -1.24 | -0.71 | -0.46 | -0.48 |
| BU374385 | CG9153-PA                                                   | 4.08  | 2.20  | 1.62  | -0.02 | 1.06  | -0.25 | 0.64  | -0.82 |
| BU378217 | CG1544-PA                                                   | -1.17 | -0.87 | -1.60 | 0.24  | 0.44  | -0.57 | -0.15 | -0.50 |
| BG625163 | CG13214-PA                                                  | -0.11 | 0.57  | -0.61 | 1.00  | -2.16 | 0.17  | -0.12 | -0.23 |
| BU363842 | CG12178-PA                                                  | -0.15 | -0.85 | 1.03  | -0.09 | 0.17  | 1.20  | -0.26 | -0.13 |
| BU368604 | CG11859-PA                                                  | 0.59  | 0.53  | 1.67  | 0.33  | -1.37 | 0.94  | 0.39  | 0.90  |
| BU452818 | CG10663-PA                                                  | 1.22  | 0.88  | 0.98  | 0.65  | -1.76 | 0.88  | 0.39  | 0.58  |
| BU334351 | centriole associated protein CEP110                         | -1.07 | -1.17 | -1.62 | -0.41 | -0.86 | -0.75 | -0.21 | -0.24 |
| BU481823 | CEGPI protein                                               | -0.50 | -1.26 | -1.52 | -0.36 | 1.47  | 0.31  | 0.39  | 0.04  |
| AW773304 | Cenk protein                                                | -0.72 | -0.06 | -1.22 | -0.92 | 0.02  | -1.04 | -0.54 | -0.80 |
| BU214157 | cardiac leiomodin                                           | -1.00 | -1.00 | -1.19 | -1.86 | -0.88 | -0.95 | -0.52 | -0.88 |
| BU129634 | capillary morphogenesis protein-1                           | -1.35 | -1.17 | -1.15 | -0.38 | -0.99 | -0.01 | -0.24 | 0.26  |
| BU261787 | Calcium-binding mitochondrial carrier protein Aralar1       | 0.39  | -0.21 | 1.42  | 0.22  | -0.32 | 1.17  | 0.06  | 0.25  |
| BU389210 | bx24                                                        | 0.85  | 0.85  | 1.97  | 0.47  | -1.15 | 0.50  | 0.07  | 0.57  |
| BU379992 | b-tomосyn                                                   | 2.09  | 1.69  | 1.50  | 0.58  | 1.24  | 0.36  | 0.13  | 0.68  |
| BU109430 | bromodomain containing protein                              | 0.66  | 0.75  | 1.25  | 0.30  | -1.11 | 0.72  | 0.38  | 0.74  |
| BU236551 | Bone morphogenetic protein 3b (Bone inducing protein) (BIP) | -0.43 | 0.21  | -1.06 | -1.15 | -0.64 | -0.26 | -0.03 | -0.37 |
| BU443629 | bone marrow protein BM039                                   | 0.21  | 0.58  | 1.74  | 0.69  | 0.17  | 1.01  | 0.34  | 0.11  |
| BU462612 | BLu protein                                                 | -0.38 | -0.67 | -1.39 | 1.14  | -1.67 | 0.96  | 0.52  | 1.16  |
| BE139885 | BC024322 protein                                            | -0.13 | 0.39  | -0.59 | 1.05  | -1.08 | 0.26  | 0.50  | 0.84  |
| AI981478 | BAF60b                                                      | -0.85 | -0.61 | -1.05 | -0.01 | -1.00 | -0.62 | -0.18 | -0.37 |
| BU390390 | axonemal dynein heavy chain 9                               | -1.08 | -1.89 | -3.00 | -0.68 | -2.32 | 0.33  | 0.75  | 0.78  |
| BU247950 | Apolipoprotein B-100 (Apo B-100)                            | -1.58 | -0.70 | -0.87 | -1.60 | -1.23 | -1.58 | -1.33 | -0.32 |
| BG625525 | anthracycline-associated resistance ARX                     | 1.38  | 0.49  | 1.18  | -0.19 | -1.29 | -0.17 | -0.54 | -0.48 |
| BU234534 | Amotl2 protein                                              | 0.38  | 0.40  | -0.77 | -1.11 | -2.24 | -0.60 | -0.60 | -0.58 |
| BG625457 | alternative splicing factor ASF-1                           | 0.34  | 0.70  | 1.11  | 0.54  | -1.13 | 0.56  | 0.44  | 0.82  |
| AI979982 | Alpha-2-HS-glycoprotein (Fetuin-A)                          | -0.71 | -1.19 | -1.61 | -0.83 | -0.18 | -0.34 | -0.33 | -0.16 |
| BU288498 | AI648912                                                    | 0.11  | 0.19  | 0.30  | -0.34 | -1.06 | -1.15 | 0.00  | 0.03  |
| AI980945 | AF261233 protein                                            | 1.86  | 2.22  | 1.81  | 1.37  | -0.04 | 0.65  | 0.34  | 0.74  |
| BU373438 | AF-17 protein                                               | -0.74 | -0.39 | -1.24 | -0.81 | -0.75 | -1.17 | -0.59 | -0.69 |
| BU455504 | ADP-ribosylation-like 2 binding protein                     | -1.10 | -1.29 | -1.18 | 0.12  | 0.62  | -0.14 | 0.45  | -0.32 |
| BU329970 | AD024                                                       | -0.14 | 1.34  | 0.99  | 1.10  | 1.29  | -0.41 | 0.02  | -0.13 |
| BU239744 | 180 kDa secretory phospholipase A2 receptor (PLA2-R)        | 0.91  | 1.41  | 0.11  | -0.27 | 1.15  | -0.17 | -0.13 | -0.05 |
